# Supplementary material
Source: PubMed Central journal article supplement (PMC4205598)
Supplement: pnas.1412431111.sapp.pdf [file pnas.1412431111.sapp.pdf]

## Supporting Information

An et al.

### SI Materials and Methods

**Bacterial Strains and Growth Conditions.** The bacterial strains and plasmids used in this study are listed in SI Appendix, Table S2. *Burkholderia glumae* BGR1 and two QS-defective mutants, BGS2 (BGR1 *tofl*:: $\Omega$ ) and BGS9 (BGR1 *qsmR*:: $\Omega$ ), were grown in LB broth (0.1% tryptone, 0.5% yeast extract, and 0.5% NaCl [all w/v]; USB Corp., Cleveland, OH) or in LB broth buffered with 100 mM HEPES (pH 7.0) (BLB) at 37°C.

**Generation of the S9C17 and KJ1120 Strains.** For genetic complementation of the *qsmR* mutant BGS9, we mutagenized the mutant by mini-Tn5rescue (1) to integrate *qsmR* into the genome as a single copy. A single copy of the *qsmR* gene was inserted in the intergenic region between *bglu\_2g019970* and *bglu\_2g01980* in chromosome 2 of the *qsmR* mutant BGS9, resulting in S9C17. The *ptsI* mutant KJ1120 (BGR1 *ptsI*::mini-Tn5rescue) was constructed as previously described (1). Mini-Tn5rescue was inserted at the 3' end of *ptsI* gene (between 1,577 and 1,578 bp in a total length of 1,770 bp), which disrupted a PEP-utilizers\_C domain (2).

**Statistical Analyses.** The JMP 10 statistical software for Windows (SAS Institute Inc., Cary, NC) was used for all statistical analyses. A one-way analysis of variance was used to detect significant differences among the levels of intracellular metabolites of *B. glumae* BGR1 (wild- type), BGS2 (BGR1 *tofl*:: $\Omega$ ) and BGS9 (BGR1 *qsmR*:: $\Omega$ ). A one-way analysis of variance was used to detect significant differences among the growth rates of *B. glumae* BGR1 and two QS-defective mutants, BGS2 (BGR1 *tofl*:: $\Omega$ ) and BGS1 (BGR1 *tofR*:: $\Omega$ ) in the absence and presence of C8-HSL, and BGS9 (BGR1 *qsmR*:: $\Omega$ ), and S9C17 (BGR1 *qsmR*:: $\Omega$ /*qsmR*) during the exponential growth stage. Student's t-test was used to identify significant differences between sample pairs. A p-value < 0.05 was considered to indicate statistical significance.

**RNA isolation and quantitative reverse transcription-polymerase chain reaction (qRT-PCR).** Total RNAs from *B. glumae* BGR1 and two QS-defective mutants, BGS2 (BGR1 *tofl*:: $\Omega$ ) and BGS9 (BGR1 *qsmR*:: $\Omega$ ), grown in LB medium at 37°C for 10 h after subculture, were extracted using RNeasy mini kits (Qiagen) following the manufacturer's protocol. Total RNA was treated with RNase-free DNaseI (Ambion) to remove gDNA. We reverse-transcribed 1- $\mu$ g amounts of total RNA into cDNA using M-MLV Reverse Transcriptase (Promega) acting for 1 h at 42°C. The primer pairs used in qRT-PCR are listed in SI Appendix, Table S3. 16S rRNA served as a positive control. Transcriptional levels were determined using SsoFast EvaGreen Supermix (Bio-Rad) and a CFX96 Real-Time PCR System (Bio-Rad). The thermal cycling parameters were: 95°C for 30 sec, followed by 40 cycles of 95°C for 5 sec, and 60°C for 5 sec. All PCRs were performed three times, and all data were normalized to the expression levels of the 16S rRNA gene, using Bio-Rad CFX Manager software.

**Electrophoretic mobility shift assay.** QsmR-His was purified as described previously (1). The upstream regions of putative QsmR target genes were amplified using the primers shown in Table S3. PCR products were labeled with biotin using Lightshift Chemiluminescent Electrophoretic Mobility Shift Assay Kits, as described by the manufacturer (Pierce). We used the 329 bp upstream of *katE1* as a competitor DNA; this was amplified using the KatE1-F and KatE1-R primers, as described previously (see SI Appendix, Table

S3). Purified QsmR-His (500 nM) was incubated in binding buffer [10 mM Tris-HCl (pH 7.5), 100 mM NaCl, 0.5 mM EDTA, 1 mM DTT, 5% (v/v) glycerol, and 10 ng  $\mu\text{l}^{-1}$  poly (dI-dC)] containing 0.25 nM or 2.5 nM biotin-labeled DNA, for 15 min at 28°C. In competition analyses, unlabeled target DNA at 10–20-fold molar excess was added to each reaction along with the extract, before addition of labeled DNA targets. Reaction mixtures were separated in non-denaturing 4% (w/v) polyacrylamide gels and transferred to nitrocellulose membranes, followed by detection of relevant bands using streptavidin/horseradish peroxidase-derived chemiluminescence kits, as described by the manufacturer (Pierce). Images were visualized using Chemi Doc XRS+ and the Image Lab Software (Bio-Rad).

**Table S1.** The intracellular metabolite concentrations of *Burkholderia glumae* BGR1 (wild-type) and two QS-defective mutants, BGS2 (BGR1 *tofl::Ω*) and BGS9 (BGR1 *qsmR::Ω*), grown in LB broth or in LB broth buffered with 100 mM HEPES (pH 7.0) at 37°C.

| Metabolite                 | Concentration (pmol/10 <sup>9</sup> cells)                  |         |         |                                                               |         |        |                                                                |         |         |
|----------------------------|-------------------------------------------------------------|---------|---------|---------------------------------------------------------------|---------|--------|----------------------------------------------------------------|---------|---------|
|                            | Mid-exponential growth stage in LB (6 hrs after subculture) |         |         | Late-exponential growth stage in LB (10 hrs after subculture) |         |        | Late-exponential growth stage in BLB (10 hrs after subculture) |         |         |
|                            | BGR1                                                        | BGS2    | BGS9    | BGR1                                                          | BGS2    | BGS9   | BGR1                                                           | BGS2    | BGS9    |
| 2-Phosphoglyceric acid     | 43.667*                                                     | 170.333 | 71.667  | 45.2                                                          | 174     | 108.2  | 91.62                                                          | 157.72  | 168.11  |
| 3-Hydroxybutyric acid      | 1000.67                                                     | 2518    | 1707.33 | 2549.6                                                        | 2180.4  | 1282.6 | 1511.33                                                        | 1256.33 | 914.33  |
| 3-Phosphoglyceric acid     | 236.33                                                      | 1573    | 668.67  | 112.6                                                         | 978.2   | 551.6  | 162.65                                                         | 437.14  | 378.49  |
| 6-Phosphogluconic acid     | 19.3333                                                     | 58      | 67.3333 | 30.78                                                         | 97.6    | 113.2  | 83.32                                                          | 133.73  | 98.10   |
| Acetyl CoA_divalent        | 175.333                                                     | 42.667  | 69.333  | 853                                                           | 673     | 830.8  | 1031                                                           | 2301    | 1436.67 |
| Adenine                    | 142.667                                                     | 97.667  | 169     | 192.6                                                         | 187.4   | 197.6  | 172.333                                                        | 237.333 | 238.667 |
| Adenosine                  | 797.667                                                     | 566.333 | 770     | 878                                                           | 769.4   | 788.4  | 1062.33                                                        | 1397    | 1224.33 |
| ADP                        | 812.67                                                      | 1935.67 | 1181    | 712.8                                                         | 2174.2  | 1712.2 | 1345.33                                                        | 3134.33 | 2857    |
| Ala                        | 2869.33                                                     | 970.33  | 1747    | 1479.8                                                        | 4193    | 3066.6 | 1600.33                                                        | 2923.33 | 2145.67 |
| AMP                        | 411                                                         | 639     | 524     | 430.6                                                         | 832.4   | 738    | 620                                                            | 1161    | 810.33  |
| Anthranilic acid           | 224.667                                                     | 370.667 | 306     | 25.2                                                          | 102.4   | 98.8   | 14.58                                                          | 86.44   | 50.29   |
| Arg                        | 2820.67                                                     | 1409.67 | 2317    | 6997.8                                                        | 2386.4  | 2222.4 | 11033.3                                                        | 5928.7  | 5577.3  |
| Asn                        | 110                                                         | 82      | 106     | 101                                                           | 89      | 88     | 46.61                                                          | 64.73   | 51.83   |
| Asp                        | 1392                                                        | 1601.67 | 1871.67 | 1098.4                                                        | 1134.2  | 1091.4 | 523.333                                                        | 811     | 664     |
| ATP                        | 1411.67                                                     | 5201.67 | 2805.33 | 1434.4                                                        | 6425.4  | 5124.6 | 2536                                                           | 7508.33 | 7807    |
| Betaine                    | 4336.67                                                     | 8489.67 | 8169.67 | 3857                                                          | 19755.8 | 9636.6 | 6140                                                           | 10059   | 8975.7  |
| cAMP                       | 103.333                                                     | 126     | 160.667 | 141.4                                                         | 124.4   | 143.2  | 130.333                                                        | 160     | 163.667 |
| CDP                        | 49.667                                                      | 101     | 58.667  | 62.2                                                          | 187.8   | 159.2  | 118.333                                                        | 459.333 | 421.333 |
| cGMP                       | 80.667                                                      | 106.667 | 124.333 | 149.2                                                         | 130.6   | 142.4  | 105.08                                                         | 130.75  | 138.10  |
| Choline                    | 15.2333                                                     | 16      | 19.3333 | 36.2                                                          | 63.6    | 54     | 36                                                             | 77      | 51.6667 |
| Citric acid                | 355.667                                                     | 648.333 | 668.333 | 689.6                                                         | 913.8   | 882    | 827.67                                                         | 1194.67 | 660.33  |
| Citrulline                 | 189.333                                                     | 246.667 | 278.667 | 206                                                           | 566.8   | 873.2  | 152.333                                                        | 205     | 158.333 |
| CMP                        | 158.667                                                     | 306.333 | 262.667 | 306.4                                                         | 330.8   | 369.4  | 199.333                                                        | 592.333 | 410.333 |
| CTP                        | 117.333                                                     | 361     | 227.667 | 164                                                           | 709     | 601.6  | 290                                                            | 1544.33 | 1501    |
| Cytidine                   | 172.333                                                     | 104.333 | 203.333 | 460.6                                                         | 175.6   | 281    | 335.667                                                        | 622.667 | 755     |
| Cytosine                   | 526                                                         | 138     | 333     | 105.8                                                         | 119.4   | 102.6  | 158.667                                                        | 206     | 187.667 |
| dATP                       | 69                                                          | 166     | 105     | 38.8                                                          | 157     | 115    | 67                                                             | 195.667 | 176.667 |
| dCTP                       | 31.6667                                                     | 81.6667 | 61.3333 | 35.4                                                          | 150.6   | 110.8  | 46.73                                                          | 229.76  | 206.80  |
| Dihydroxyacetone phosphate | 171.667                                                     | 419.667 | 385.333 | 283                                                           | 422     | 444.8  | 292.21                                                         | 306.03  | 290.62  |
| dTDP                       | 53.3333                                                     | 68      | 54.3333 | 37                                                            | 82.8    | 68     | 40                                                             | 112.333 | 82.667  |
| dTMP                       | 21.6667                                                     | 30.3333 | 35.6667 | 11.72                                                         | 21.4    | 21.8   | 15.23                                                          | 30.13   | 22.27   |
| dTTP                       | 82                                                          | 139.333 | 87.667  | 64.4                                                          | 184.2   | 154.4  | 57                                                             | 221.333 | 210     |
| Fructose 6-phosphate       | 114.667                                                     | 514     | 355.333 | 155.6                                                         | 403.6   | 495.6  | 151.667                                                        | 312.333 | 263.333 |
| GABA                       | 90.333                                                      | 106     | 104.333 | 501.8                                                         | 127     | 147.8  | 515                                                            | 622.333 | 282.333 |

|                             |         |         |         |         |         |         |         |         |         |
|-----------------------------|---------|---------|---------|---------|---------|---------|---------|---------|---------|
| GDP                         | 113.333 | 321.667 | 180.333 | 96.8    | 500     | 292.6   | 385.333 | 894.333 | 875.667 |
| Gln                         | 1912    | 6065    | 6464.67 | 5534.2  | 15513.8 | 17082.2 | 2954    | 4352.67 | 8001.67 |
| Glu                         | 13340.7 | 17579.7 | 21812.3 | 17941.8 | 45655.8 | 43779.4 | 10926.7 | 23349.7 | 31296.3 |
| Gluconic acid               | 306.333 | 293.333 | 459     | 292     | 362.2   | 412.2   | 355     | 442.667 | 461     |
| Glucose 1-phosphate         | 40      | 64.3333 | 62.6667 | 46.2    | 131.8   | 106.8   | 44.3333 | 72.6667 | 65.6667 |
| Glucose 6-phosphate         | 138     | 576.333 | 454     | 159.4   | 632.8   | 646.6   | 119.333 | 362.333 | 224     |
| Glutathione (GSSG)_divalent | 1399.33 | 2741.67 | 3917.67 | 4629.8  | 16696.2 | 11361.2 | 2667.7  | 12677.7 | 12091.7 |
| Gly                         | 3274.67 | 2302.33 | 3355    | 4958.6  | 4684.4  | 4021.6  | 3489    | 3611.33 | 4292    |
| Glycerol 3-phosphate        | 837     | 2752.33 | 1775.67 | 418.2   | 1286.4  | 1740.2  | 698.33  | 2169    | 1309    |
| Glyoxylic acid              | 295     | 337.333 | 310.667 | 242.75  | 149     | 170.5   | 421.667 | 247.667 | 359.333 |
| GMP                         | 16.6667 | 48.6667 | 30      | 19.2    | 50.6    | 48.2    | 34      | 68.6667 | 54.6667 |
| GTP                         | 143.333 | 837.333 | 440.333 | 105.4   | 1062    | 549.2   | 433.67  | 1226.33 | 1232.67 |
| Guanosine                   | 43      | 60.3333 | 64      | 42.6    | 85.8    | 68.2    | 56      | 108.333 | 77.333  |
| His                         | 853.333 | 769.333 | 919.667 | 800     | 686.4   | 659.4   | 539     | 456     | 447.333 |
| Homoserine                  | 43      | 120     | 82.333  | 48.4    | 239.2   | 124.6   | 34.6667 | 57      | 59      |
| Hypoxanthine                | 418     | 221.333 | 271.333 | 69.75   | 339.75  | 197     | 311.667 | 252.667 | 199     |
| Ile                         | 4070.33 | 2607.67 | 3753    | 2765.2  | 2002    | 1896.8  | 2675.67 | 3453.67 | 2427.33 |
| Lactic acid                 | 6844.33 | 4717.67 | 4105.67 | 3986.2  | 5116.2  | 4370    | 3359.33 | 2876.67 | 2938    |
| Leu                         | 8550.67 | 5674    | 8076    | 6628.2  | 3993.8  | 3854.4  | 5881    | 7072.67 | 4871.33 |
| Lys                         | 13388.3 | 9316.7  | 13079.7 | 13452.4 | 12605.6 | 13391.4 | 11220.3 | 20854.3 | 18600.3 |
| Malic acid                  | 166.333 | 533.667 | 339.333 | 281     | 384.8   | 394.6   | 260.667 | 370     | 268.667 |
| NAD <sup>+</sup>            | 8617    | 11914.7 | 10364.7 | 14836.4 | 22038.2 | 20125.6 | 13816   | 25081   | 23451   |
| NADP <sup>+</sup>           | 208     | 570.667 | 284     | 400     | 998.2   | 1049.4  | 789.33  | 1655    | 1569.67 |
| Ornithine                   | 240.333 | 173.667 | 412.667 | 310.8   | 2668.6  | 5760    | 336.67  | 1506.33 | 1950.67 |
| Phe                         | 3362    | 2431    | 3481.33 | 1835    | 602.4   | 747.6   | 1589.33 | 1484.33 | 1119.67 |
| Phosphoenolpyruvic acid     | 122     | 819     | 260     | 89.2    | 525     | 275.4   | 100.01  | 185.37  | 179.26  |
| Pro                         | 348     | 371.333 | 372     | 1385    | 816.4   | 930.2   | 1027.33 | 891.67  | 1134.67 |
| Putrescine                  | 2287.67 | 4710    | 3008    | 3576.6  | 3160    | 2580.4  | 5963.67 | 7256.67 | 6287    |
| Ribose 5-phosphate          | 141.333 | 109.667 | 146     | 128.2   | 246.4   | 319     | 156.91  | 335.10  | 295.89  |
| Ribulose 5-phosphate        | 206.667 | 218.667 | 309     | 254.4   | 389.2   | 499     | 305.333 | 474.333 | 429.333 |
| Sedoheptulose 7-phosphate   | 371     | 214.333 | 257.333 | 123.6   | 332     | 336.6   | 154     | 432     | 264.333 |
| Ser                         | 854.67  | 1065.33 | 1056.33 | 1503.2  | 2452    | 1574.4  | 1188    | 899     | 1194.67 |
| Succinic acid               | 749     | 837     | 928.667 | 574.4   | 1868    | 1947.6  | 526.67  | 1275.33 | 1258    |
| Thr                         | 4133.67 | 3797.33 | 5068.33 | 4259.8  | 5454.4  | 4927    | 3746    | 5728.33 | 4779    |
| Trp                         | 974     | 747.333 | 957.333 | 619.8   | 253     | 340.4   | 585     | 647.333 | 511     |
| Tyr                         | 3180.67 | 1819.33 | 2469    | 2083.4  | 620.2   | 647.6   | 1754    | 2630    | 1761.33 |
| UDP                         | 246.333 | 205.667 | 178.667 | 260.4   | 395.4   | 413.4   | 617.67  | 1076.67 | 978.33  |
| UMP                         | 123.333 | 119.667 | 127.333 | 151.4   | 208     | 200.4   | 137     | 348.333 | 200.667 |
| UTP                         | 368.333 | 474     | 374     | 466     | 1000.2  | 960.4   | 1024.33 | 2321.33 | 2478.67 |
| Val                         | 7591    | 6603    | 7879    | 6662.2  | 5236.4  | 4633.4  | 5769    | 9051.67 | 6349.33 |
| β-Ala                       | 90      | 71.6667 | 95.3333 | 133.2   | 558.2   | 547.2   | 93.667  | 264     | 304.333 |

**Total**                    **109616**   **124620**   **134059**   **126419**   **209024**   **186800**   **118060**   **193339**   **186029**

<sup>c</sup> Concentrations differing in color signify that the replicate numbers differed: blue, brown in bold, black, red, and green indicate that the data are averages of those derived in five, four, three, two, and one independent experiment, respectively.

**Table S2. Bacterial strains used in this study**

| Strains          | Characteristics <sup>a</sup>     | Source or Reference |
|------------------|----------------------------------|---------------------|
| <i>B. glumae</i> |                                  |                     |
| BGR1             | Wild type, Rif <sup>R</sup>      | 1                   |
| BGS2             | BGR1 <i>tofI::Ω</i>              | 1                   |
| BGS9             | BGR1 <i>qsmR::Ω</i>              | 3                   |
| BGS1             | BGR1 <i>tofR::Ω</i>              | 1                   |
| S9C17            | BGR1 <i>qsmR::Ω/qsmR</i>         | This study          |
| KJ1120           | BGR1 <i>ptsI::mini-Tn5rescue</i> | This study          |

<sup>a</sup> Rif<sup>R</sup>, rifampicin resistance.

**Table S3. List of oligonucleotide primers used in this study**

| Primer name <sup>a</sup> | Sequence (5'→3')           |
|--------------------------|----------------------------|
| PEPpt-F                  | acgtgcattcgatgatcctcaa     |
| PEPpt-R                  | tgctcggtcagcgcccattcggcggt |
| ak-F                     | ctaccacgtgacgttcaa         |
| ak-R                     | acgcttctcaccgtctctt        |
| ndk-F                    | tcgcgcggtgaagcggag         |
| ndk-R                    | cctccagaacctggatc          |
| nrdB-F                   | tgttctcgcggccgtgttcgaggg   |
| nrdB-R                   | tcgcatgatgtactggaact       |
| carA-F                   | tgctcggccatcagatcat        |
| carA-R                   | cgctggccaggtccttcac        |
| purD-F                   | tgcgcgcatggagaacgac        |
| purD-R                   | cccatccggcaattgaact        |
| FAS-1                    | aacgaagatgttcctgct         |
| FAS-2                    | ctcgagctcgacagga           |
| NADH-1                   | gctgcgaccgtatcgtgc         |
| NADH-2                   | gatctcgttgacgctg           |
| pyk-1                    | tcgaggccgagaagtccga        |
| pyk-2                    | aggtggtaggcggtaagag        |
| pgk-1                    | gctggtgcgaactgggtc         |
| pgk-2                    | cgagcgctcgtcgttcttct       |
| PtsP-F                   | aattccctgcagcgtgaacg       |
| PtsP-R                   | tgctcaagctgattgccgac       |
| AdK-F                    | tcagggcccttttcagacg        |
| AdK-R                    | ccaacaggatcaaacgcatg       |
| NdpK-F                   | cggatagtcgttcattggtt       |
| NdpK-R                   | tcgattgccataaaaactcc       |
| RnrB-F                   | agccgcatgatgtggaattt       |
| RnrB-R                   | agcgatgtcattgattgca        |
| CpsAB-F                  | atctggtacgtgctgccggg       |
| CpsAB-R                  | ggcaacacggggggctcctt       |
| AtpS-F                   | tctggctgcgctggttctag       |
| AtpS-R                   | ttgaccgcatcgcgaattt        |
| NadD-F                   | ccaggacgtcccgaataaa        |
| NadD-R                   | taggcagcaggttcaaggc        |
| PyrK-F                   | tggaggtgctggaaacgcgc       |
| PyrK-R                   | ggcggaagcatgaaactcc        |
| PgK-F                    | tgctctgatgattgaccg         |
| PgK-R                    | ggcgatcaggtcggtaagac       |
| PrgS-F                   | tgttcggcaccaagaactga       |
| PrgS-R                   | ttggaatgaccagccatacc       |
| KatE1-F                  | actcgcgctcgtcgtgaa         |
| KatE1-R                  | acatcggcatcctgggtcgc       |

<sup>a</sup> F, forward primer; R, reverse primer

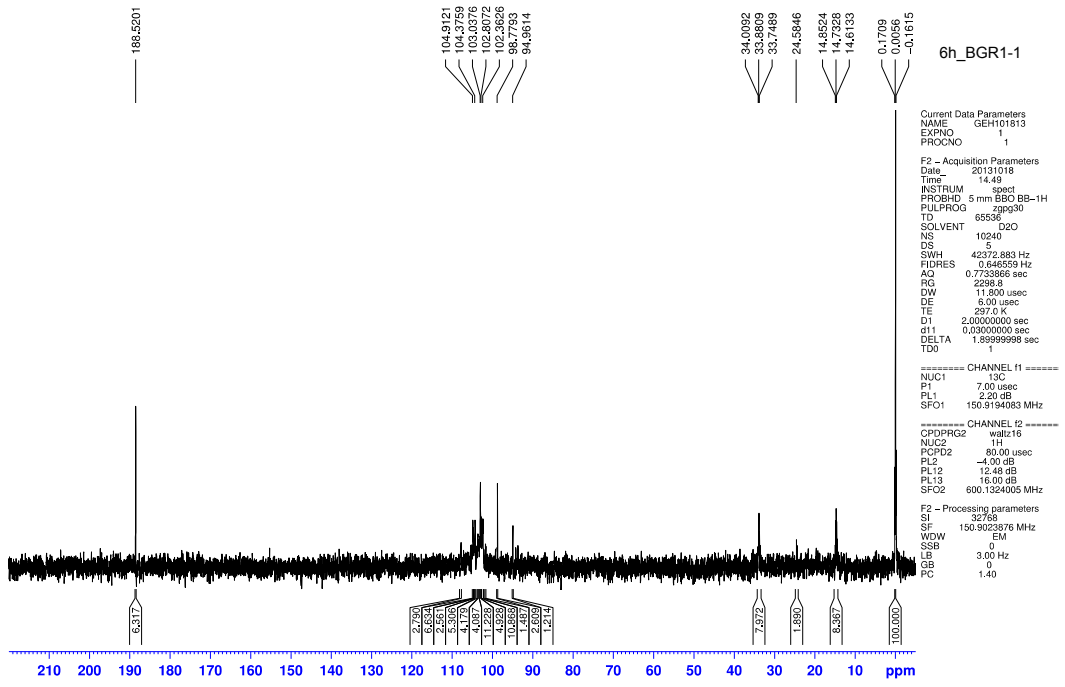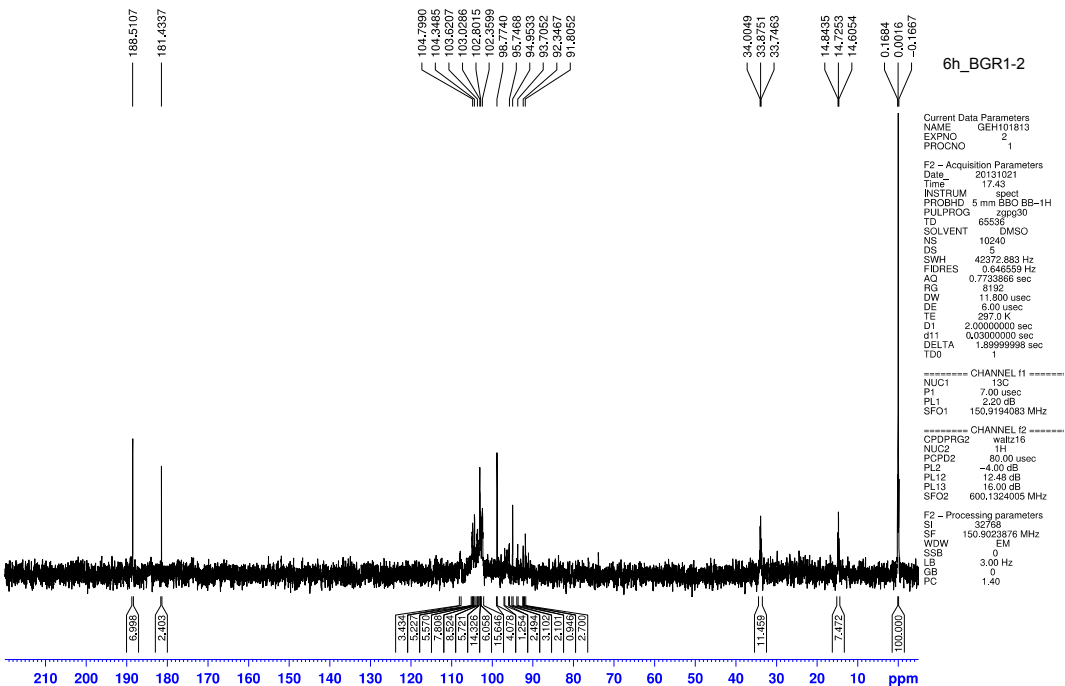

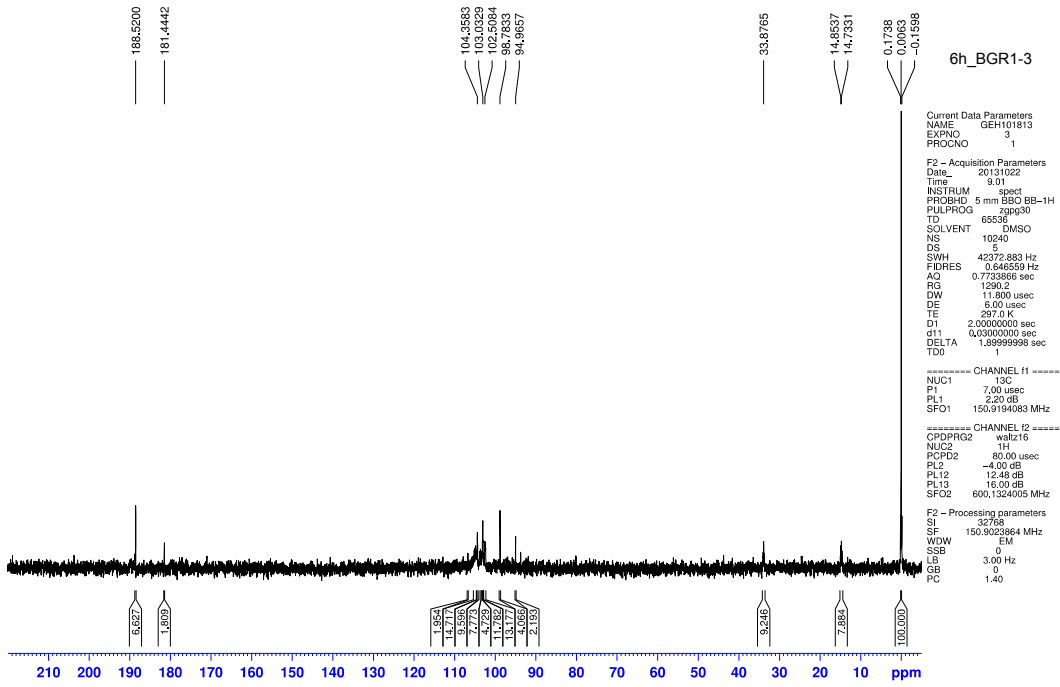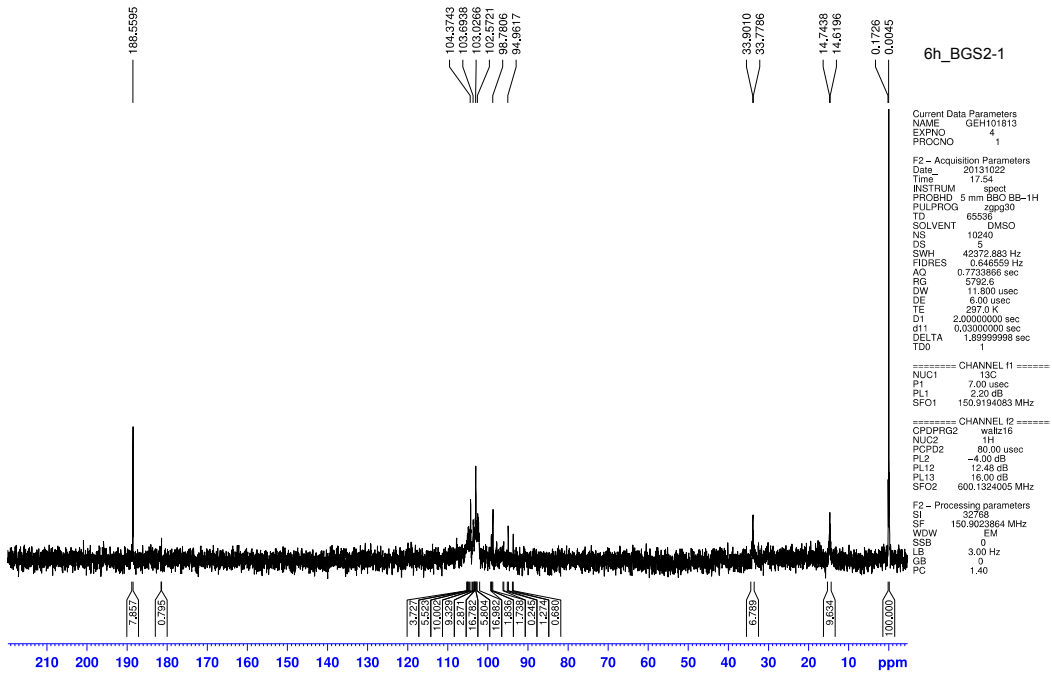



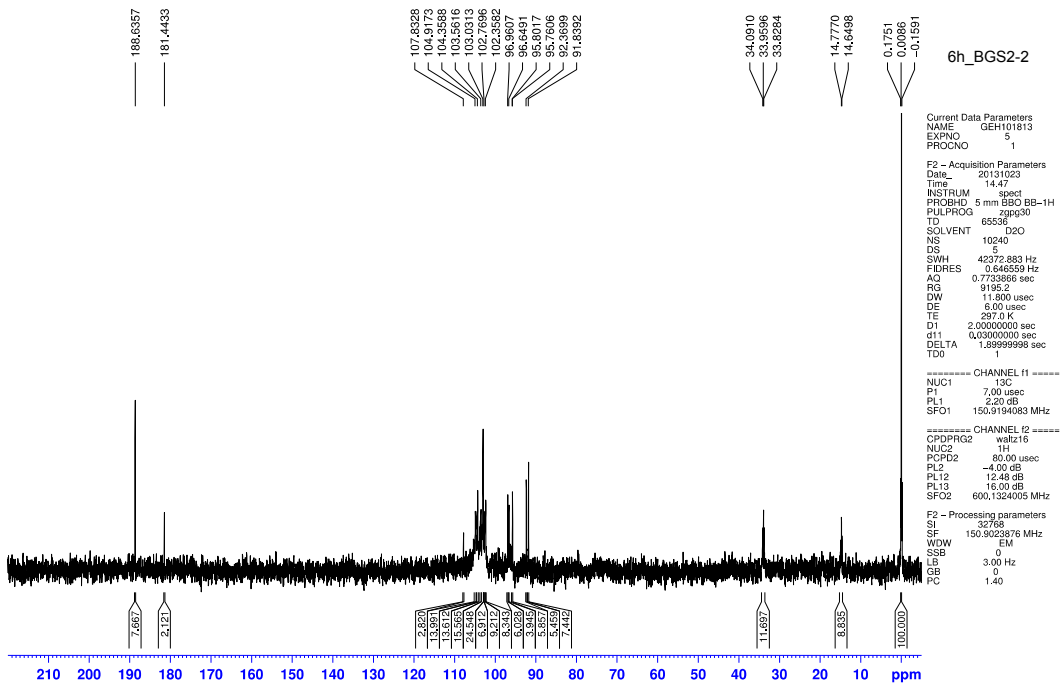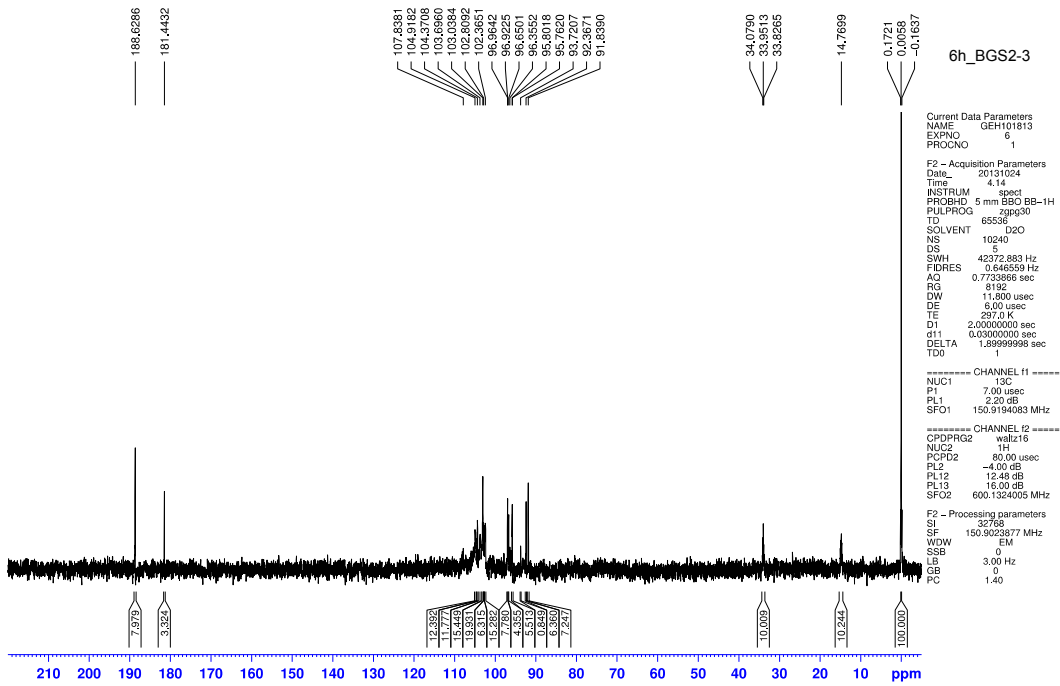

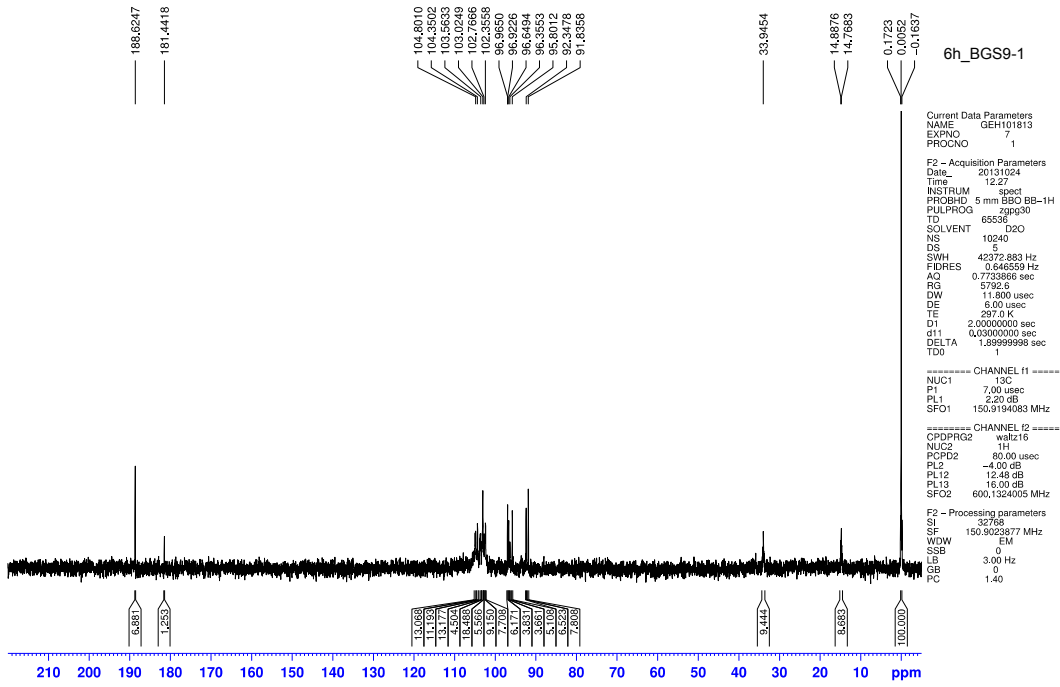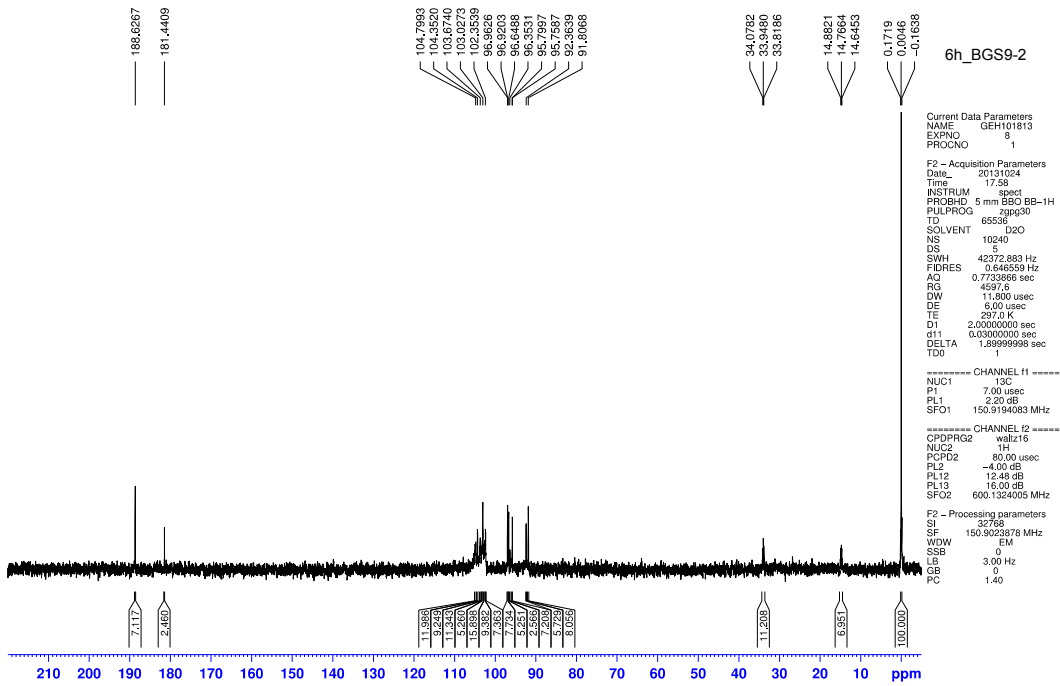

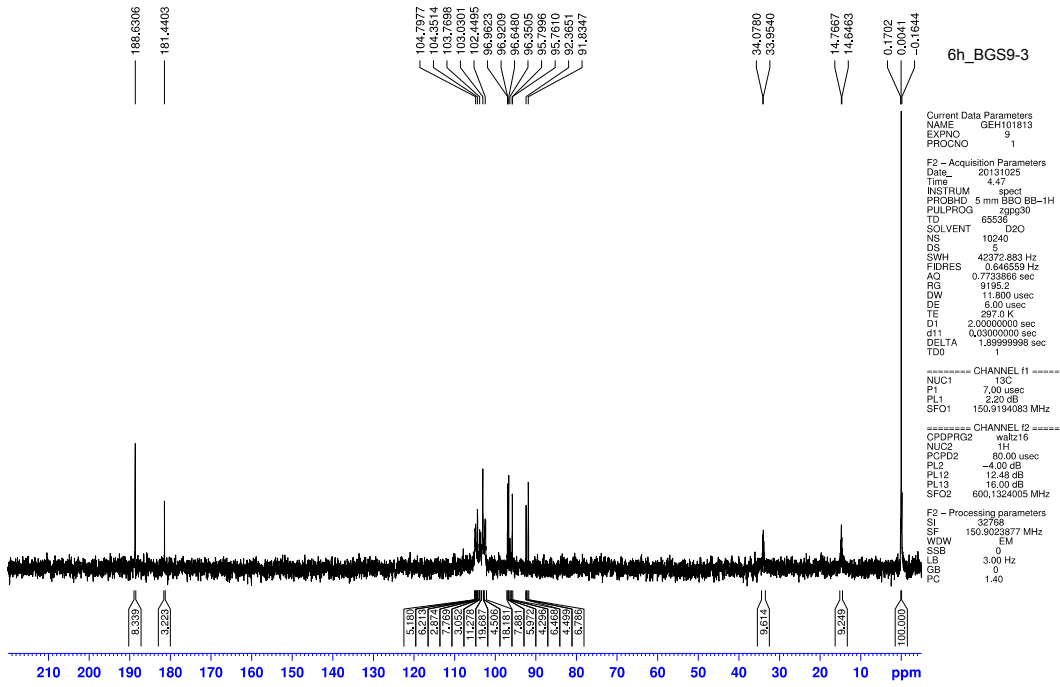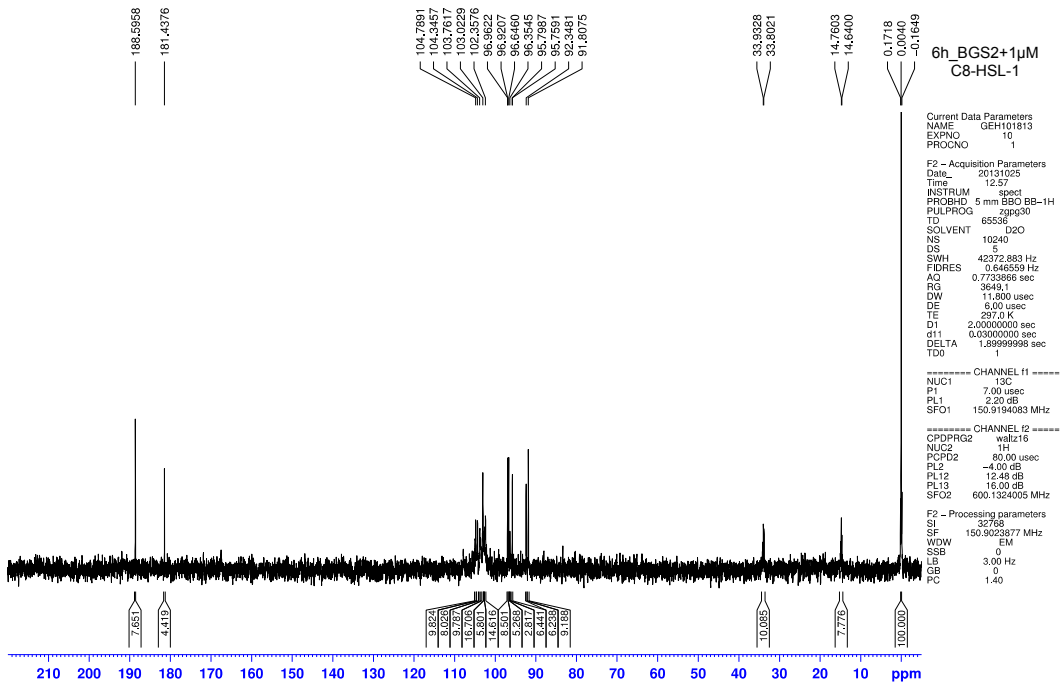

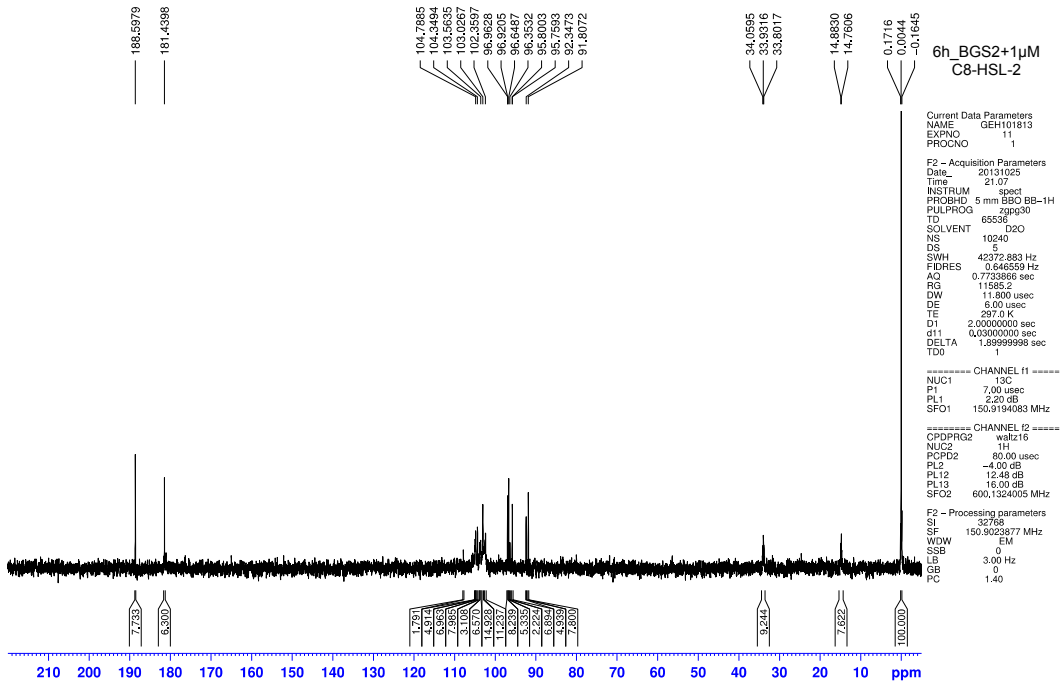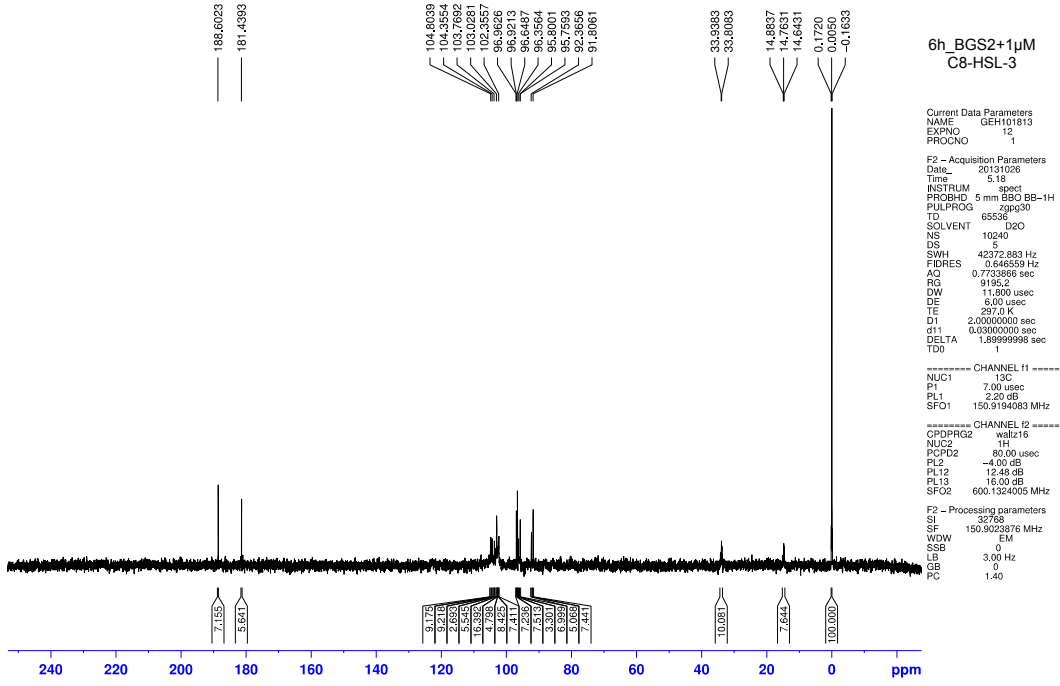

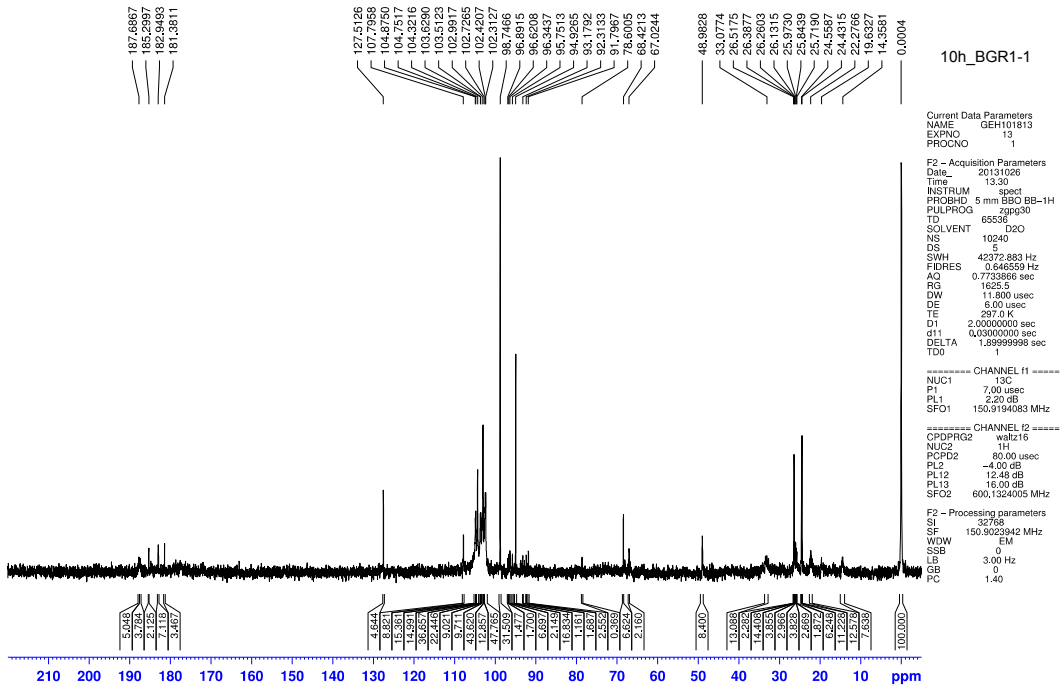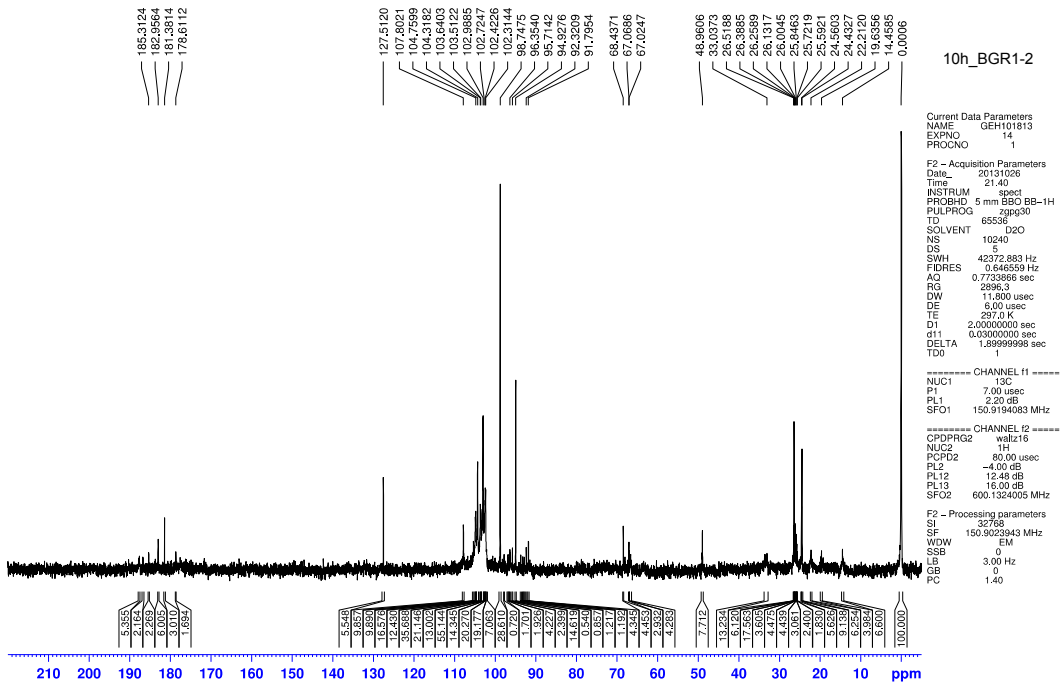

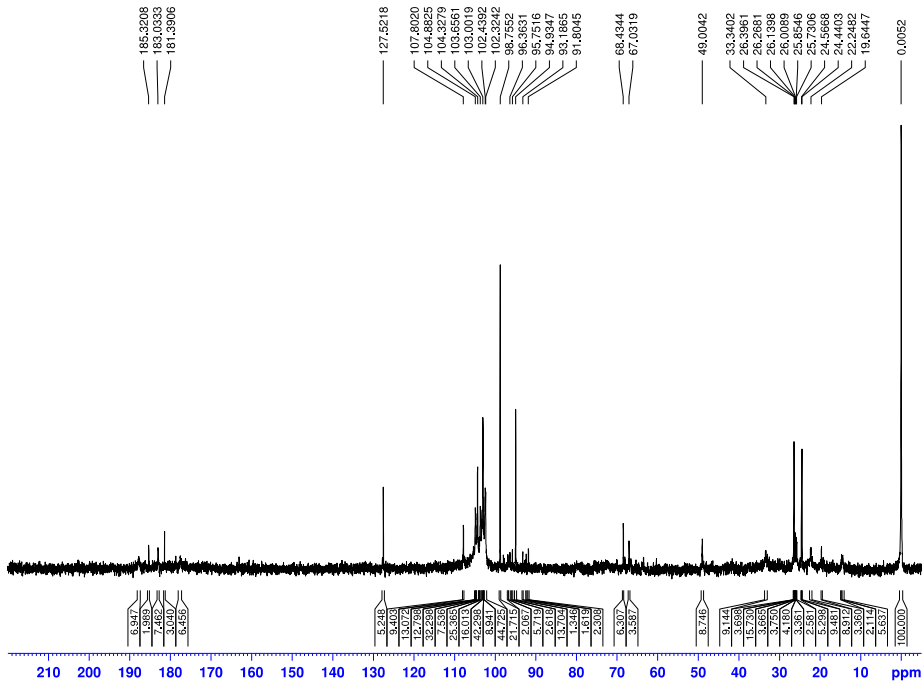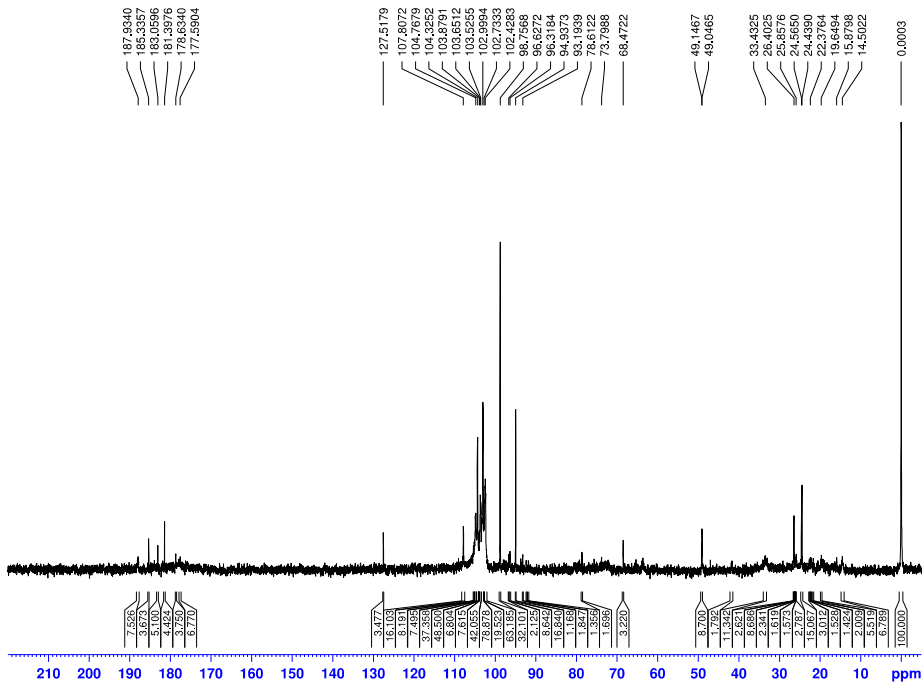

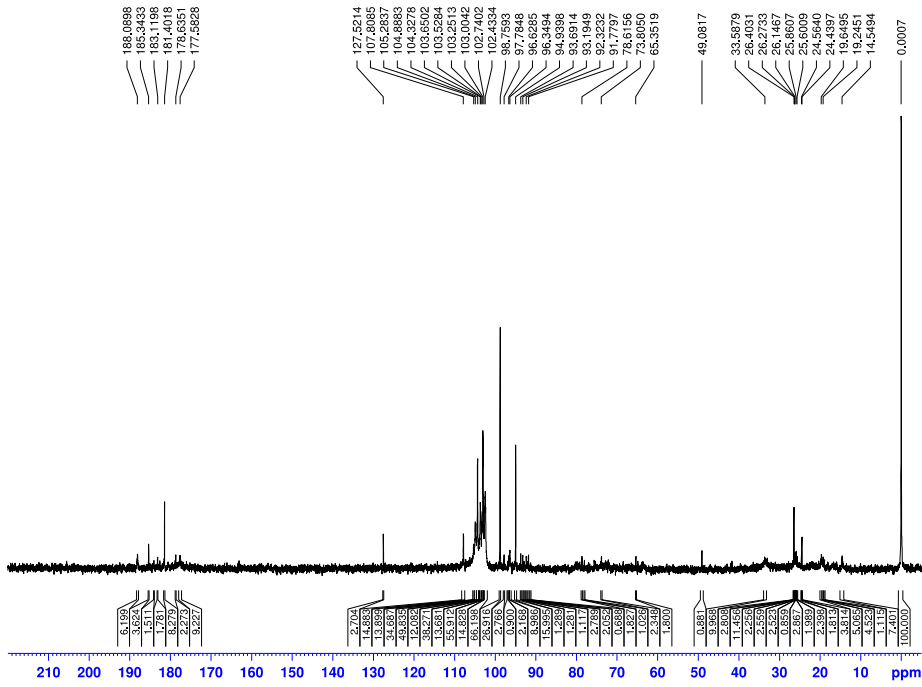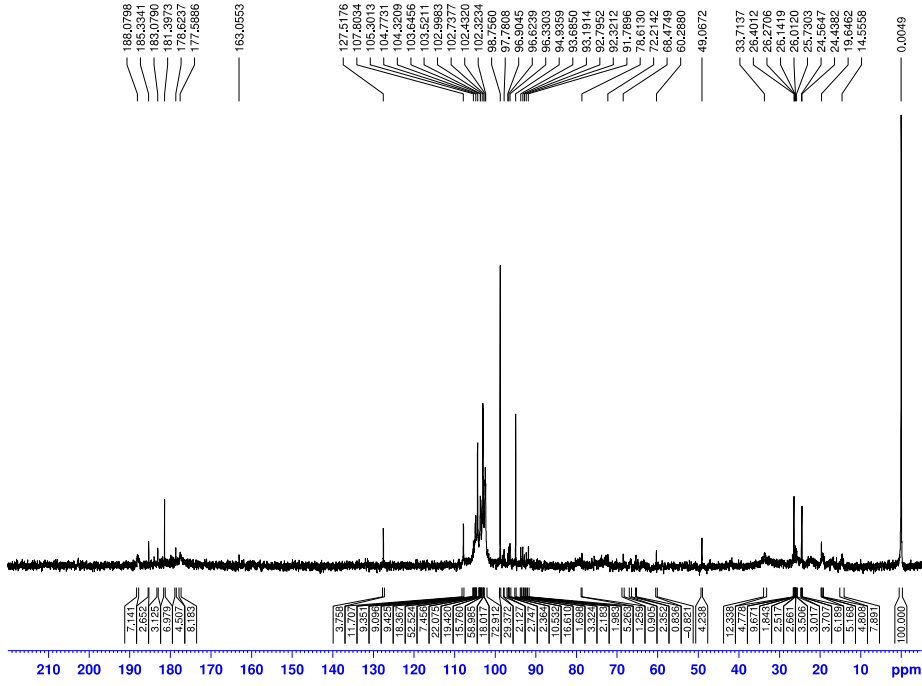

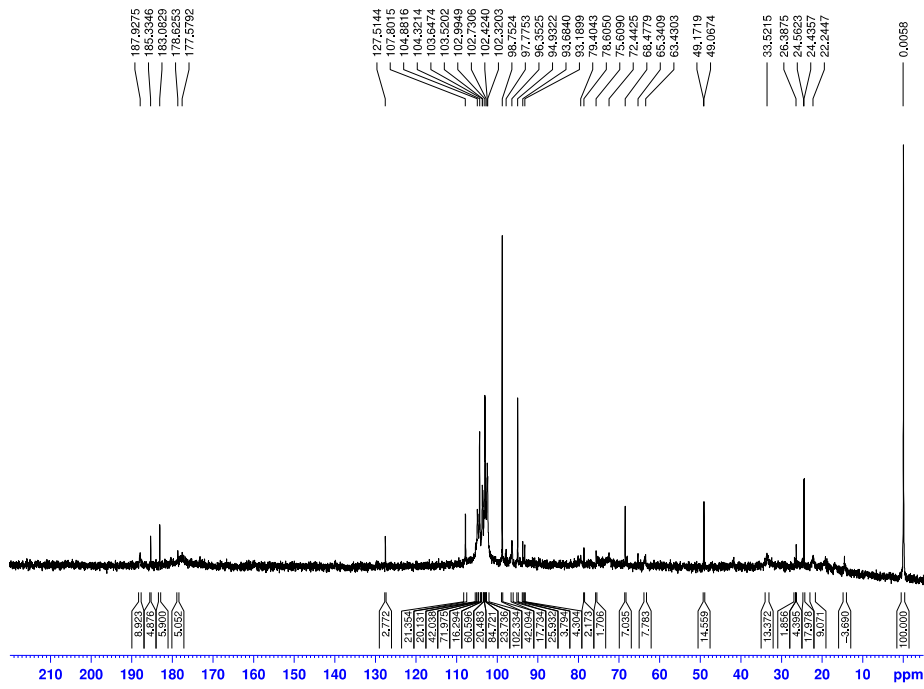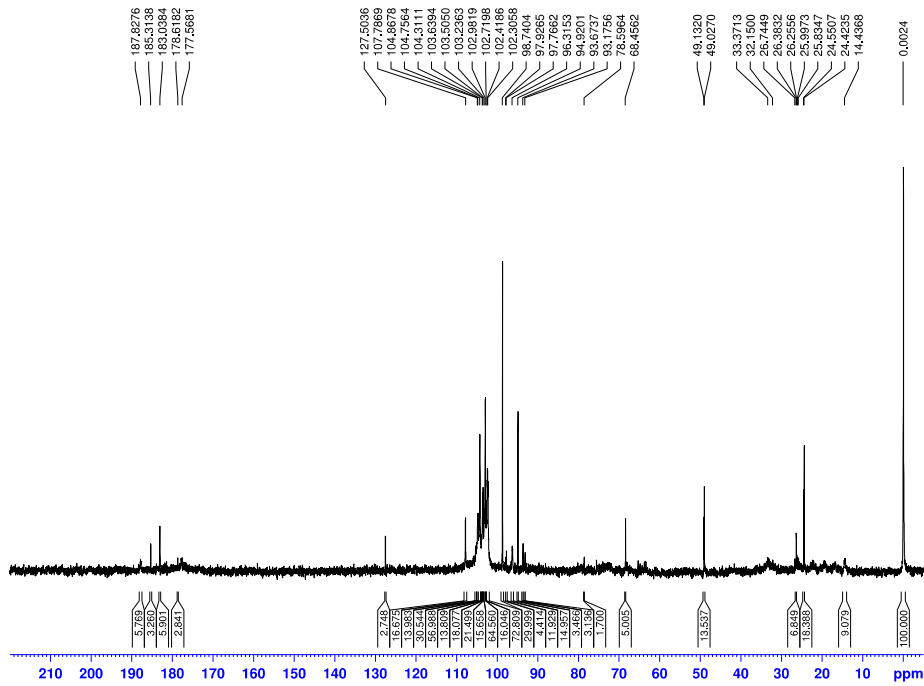



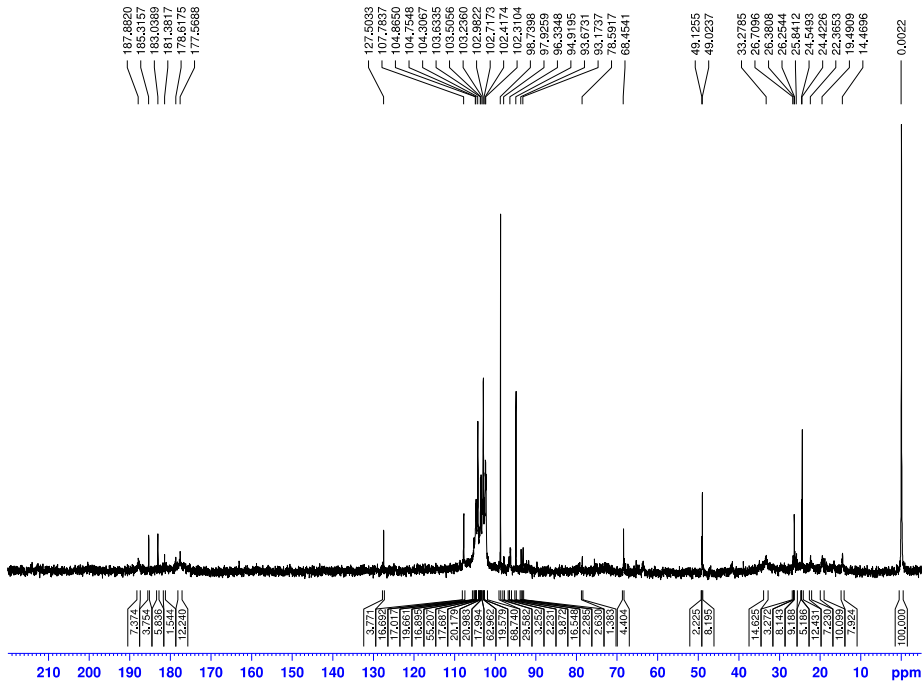

10h\_BGS9-3

Current Data Parameters  
 NAME GEH110813  
 EXPNO 9  
 PROCNO 1

F2 - Acquisition Parameters  
 Date\_ 20131111  
 Time 11.41  
 INSTRUM spect  
 PROBHD 5 mm BBO BB-1H  
 PULPROG zgpg30  
 TD 65536  
 SOLVENT D2O  
 NS 10240  
 DS 5  
 SWH 42372.883 Hz  
 FIDRES 0.646559 Hz  
 AQ 0.7733665 sec  
 RG 2580.3  
 DW 11.800 usec  
 DE 6.00 usec  
 TE 297.0 K  
 D1 2.0000000 sec  
 d11 0.0300000 sec  
 DELTA 1.8999999 sec  
 TD0

----- CHANNEL f1 -----  
 NUC1 13C  
 P1 7.00 usec  
 PL1 2.20 dB  
 SFO1 150.9194083 MHz

----- CHANNEL f2 -----  
 CPDPRG2 wellz16  
 NUC2 1H  
 PCPD2 60.00 usec  
 PL2 -4.00 dB  
 PL12 12.48 dB  
 PL13 16.00 dB  
 SFO2 600.1324005 MHz

F2 - Processing parameters  
 SI 32768  
 SF 150.9023263 MHz  
 WDW EM  
 SSB 0  
 LB 3.00 Hz  
 GB 0  
 PC 1.40

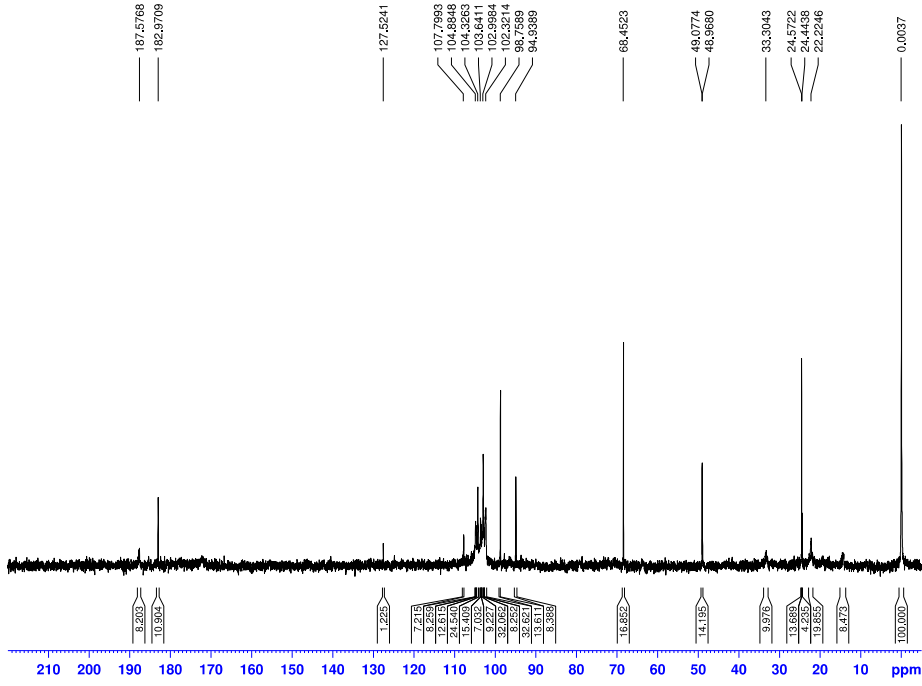

10h\_BGS2+1µM C8-HSL-1

Current Data Parameters  
 NAME GEH101813  
 EXPNO 22  
 PROCNO 1

F2 - Acquisition Parameters  
 Date\_ 20131029  
 Time 13.47  
 INSTRUM spect  
 PROBHD 5 mm BBO BB-1H  
 PULPROG zgpg30  
 TD 65536  
 SOLVENT D2O  
 NS 10240  
 DS 5  
 SWH 42372.883 Hz  
 FIDRES 0.646559 Hz  
 AQ 0.7733665 sec  
 RG 7296.2  
 DW 11.800 usec  
 DE 6.00 usec  
 TE 297.0 K  
 D1 2.0000000 sec  
 d11 0.0300000 sec  
 DELTA 1.8999999 sec  
 TD0

----- CHANNEL f1 -----  
 NUC1 13C  
 P1 7.00 usec  
 PL1 2.20 dB  
 SFO1 150.9194083 MHz

----- CHANNEL f2 -----  
 CPDPRG2 wellz16  
 NUC2 1H  
 PCPD2 60.00 usec  
 PL2 -4.00 dB  
 PL12 12.48 dB  
 PL13 16.00 dB  
 SFO2 600.1324005 MHz

F2 - Processing parameters  
 SI 32768  
 SF 150.9023263 MHz  
 WDW EM  
 SSB 0  
 LB 3.00 Hz  
 GB 0  
 PC 1.40

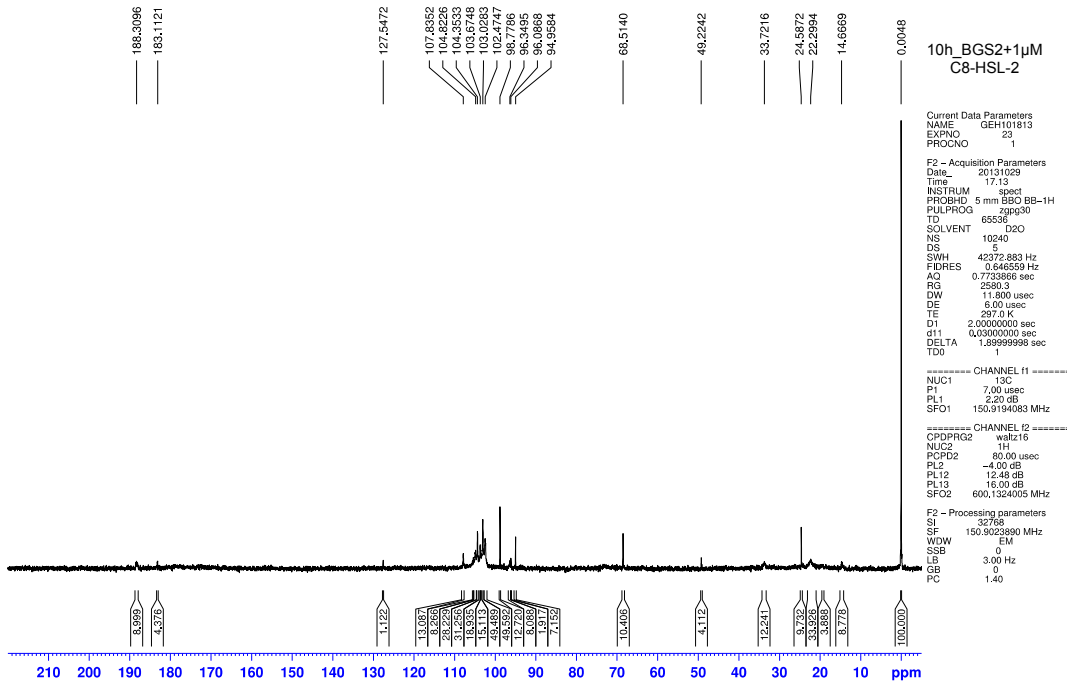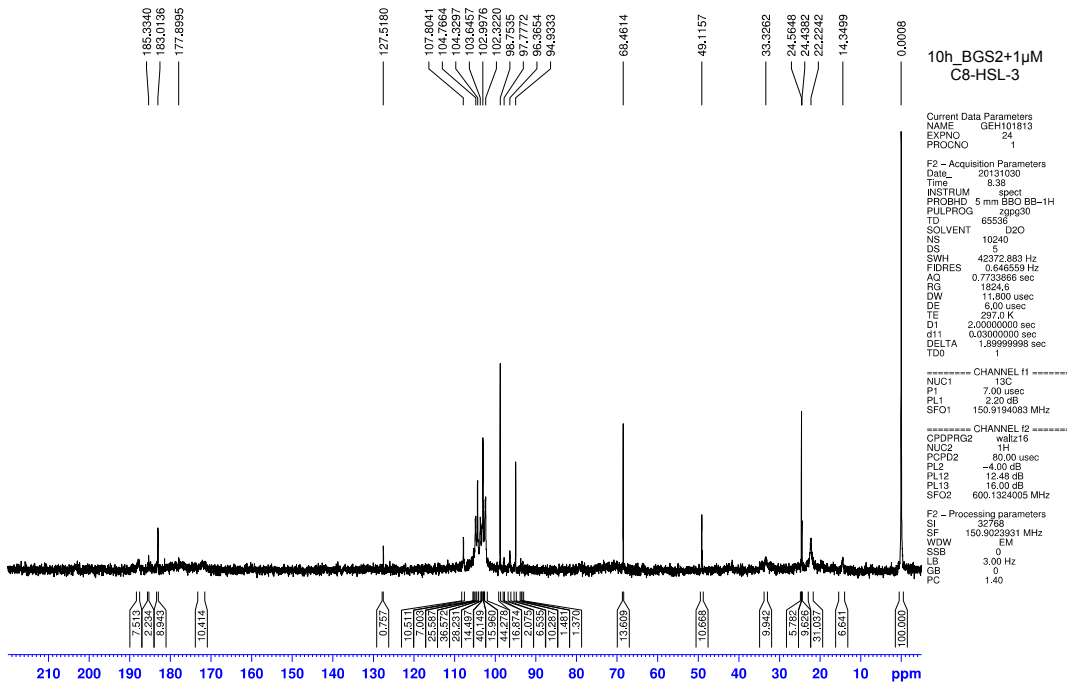

**Fig. S1.** The levels of  $[^{13}\text{C}]$ -labeled metabolites in wild-type BGR1, the *tofI* mutant BGS2, and the *qsmR* mutant BGS9, measured using  $[^{13}\text{C}]$ -nuclear magnetic resonance spectroscopy.

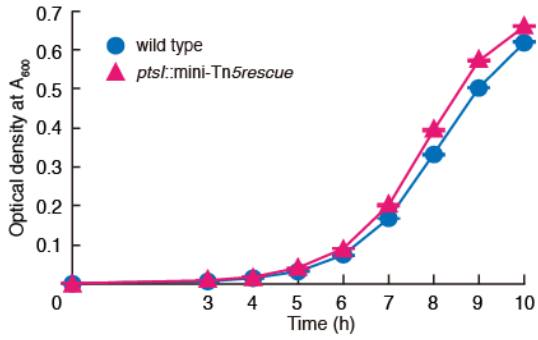

**Fig. S2.** Growth of the *ptsI* mutant KJ1120.

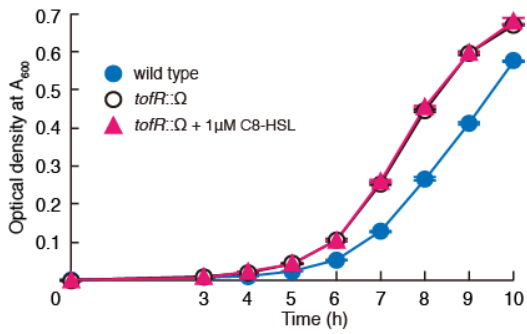

**Fig. S3.** Growth of the *tofR* mutant BGS1 in the absence and presence of C8-HSL. Error bars represent the error ranges of triplicate experiments.

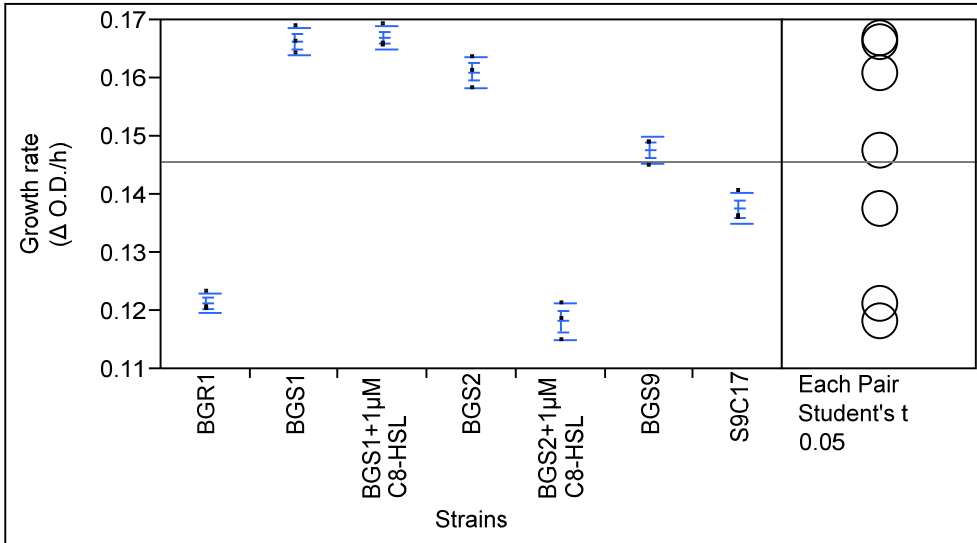

| Strain          | Number of Replicates | Mean     | Std Dev  | Connecting Letters |
|-----------------|----------------------|----------|----------|--------------------|
| BGR1            | 3                    | 0.121389 | 0.001578 | E                  |
| BGS1            | 3                    | 0.166427 | 0.002350 | A                  |
| BGS1+1μM C8-HSL | 3                    | 0.166988 | 0.001992 | A                  |
| BGS2            | 3                    | 0.161064 | 0.002636 | B                  |
| BGS2+1μM C8-HSL | 3                    | 0.118289 | 0.003131 | E                  |
| BGS9            | 3                    | 0.147775 | 0.002332 | C                  |
| S9C17           | 3                    | 0.137593 | 0.002627 | D                  |

| Strain vs Strain |                 | p-Value |
|------------------|-----------------|---------|
| BGS1+1μM C8-HSL  | BGS2+1μM C8-HSL | <.0001  |
| BGS1             | BGS2+1μM C8-HSL | <.0001  |
| BGS1+1μM C8-HSL  | BGR1            | <.0001  |
| BGS1             | BGR1            | <.0001  |
| BGS2             | BGS2+1μM C8-HSL | <.0001  |
| BGS2             | BGR1            | <.0001  |
| BGS9             | BGS2+1μM C8-HSL | <.0001  |
| BGS1+1μM C8-HSL  | S9C17           | <.0001  |
| BGS1             | S9C17           | <.0001  |
| BGS9             | BGR1            | <.0001  |
| BGS2             | S9C17           | <.0001  |
| S9C17            | BGS2+1μM C8-HSL | <.0001  |
| BGS1+1μM C8-HSL  | BGS9            | <.0001  |
| BGS1             | BGS9            | <.0001  |
| S9C17            | BGR1            | <.0001  |
| BGS2             | BGS9            | <.0001  |
| BGS9             | S9C17           | 0.0001  |
| BGS1+1μM C8-HSL  | BGS2            | 0.0097  |
| BGS1             | BGS2            | 0.0169  |
| BGR1             | BGS2+1μM C8-HSL | 0.1393  |
| BGS1+1μM C8-HSL  | BGS1            | 0.7809  |

**Fig. S4.** Statistical analysis of differences in the growth rates [ $\Delta$  optical density (O.D.)/h] of wild-type BGR1 and two QS-defective mutants, BGS2 (BGR1 *tofI::\Omega*) and BGS1 (BGR1 *tofR::\Omega*) in the absence and presence of C8-HSL, and BGS9 (BGR1 *qsmR::\Omega*), and S9C17 (BGR1 *qsmR::\Omega/qsmR*) during the exponential growth stage (6 to 9 hours after subculture).

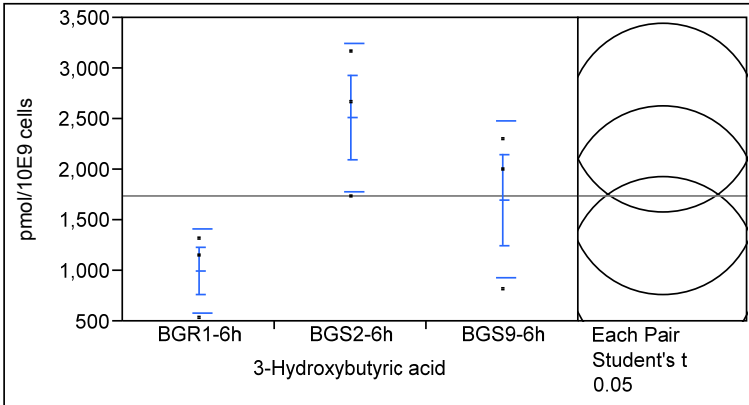

| Strain        | Number of replicates | Mean    | Standard deviation | Connecting Letters | p-value against control |
|---------------|----------------------|---------|--------------------|--------------------|-------------------------|
| BGR1-6 h (LB) | 3                    | 1000.67 | 410.665            | B                  |                         |
| BGS2-6 h (LB) | 3                    | 2518.00 | 729.095            | A                  | 0.0306                  |
| BGS9-6 h (LB) | 3                    | 1707.33 | 779.556            | AB                 | 0.2379                  |

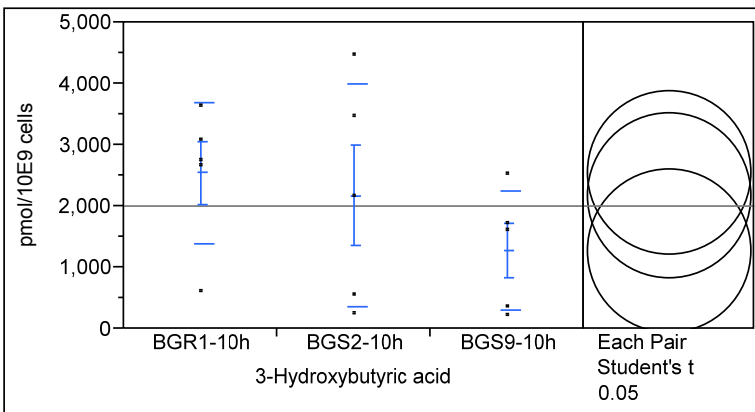

| Strain         | Number of replicates | Mean    | Standard deviation | Connecting Letters | p-value against control |
|----------------|----------------------|---------|--------------------|--------------------|-------------------------|
| BGR1-10 h (LB) | 5                    | 2549.60 | 1148.32            | A                  |                         |
| BGS2-10 h (LB) | 5                    | 2180.40 | 1829.04            | A                  | 0.6773                  |
| BGS9-10 h (LB) | 5                    | 1282.60 | 977.33             | A                  | 0.1690                  |

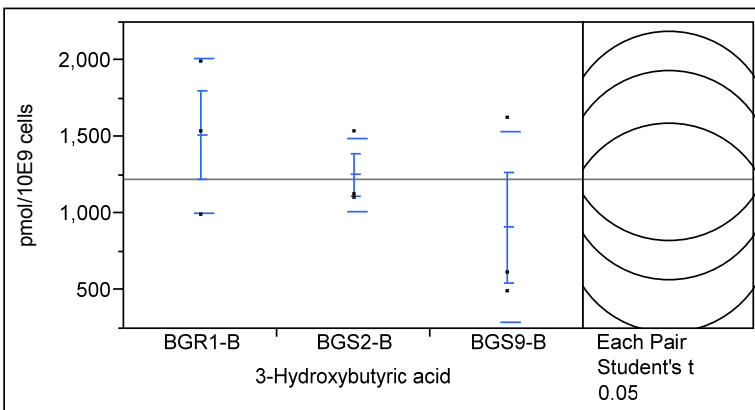

| Strain          | Number of replicates | Mean    | Standard deviation | Connecting Letters | p-value against control |
|-----------------|----------------------|---------|--------------------|--------------------|-------------------------|
| BGR1-10 h (BLB) | 3                    | 1511.33 | 500.252            | A                  |                         |
| BGS2-10 h (BLB) | 3                    | 1256.33 | 241.540            | A                  | 0.5416                  |
| BGS9-10 h (BLB) | 3                    | 914.33  | 624.959            | A                  | 0.1807                  |

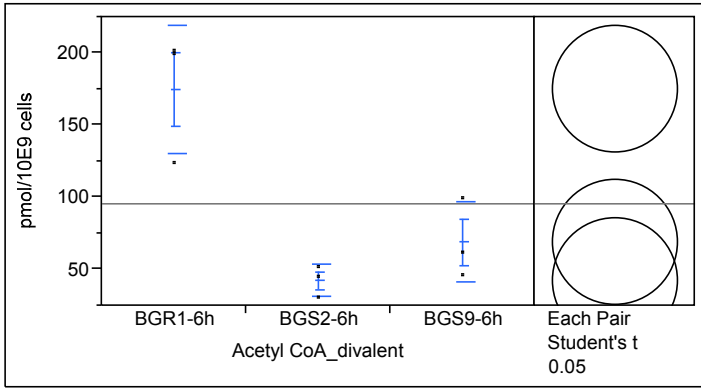

| Strain        | Number of replicates | Mean    | Standard deviation | Connecting Letters | p-value against control |
|---------------|----------------------|---------|--------------------|--------------------|-------------------------|
| BGR1-6 h (LB) | 3                    | 175.333 | 44.4672            | A                  |                         |
| BGS2-6 h (LB) | 3                    | 42.667  | 10.6927            | B                  | 0.0019                  |
| BGS9-6 h (LB) | 3                    | 69.333  | 27.7369            | B                  | 0.0057                  |

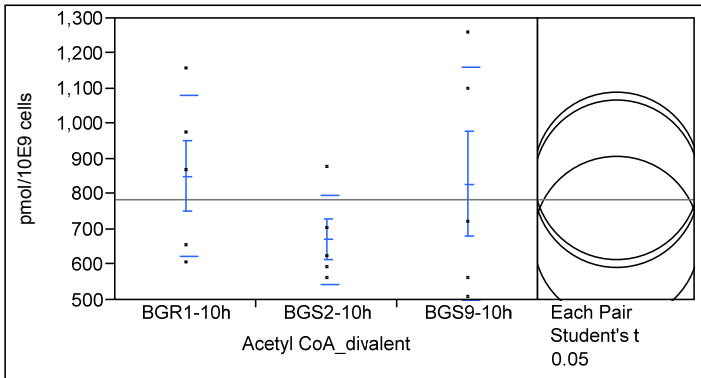

| Strain         | Number of replicates | Mean    | Standard deviation | Connecting Letters | p-value against control |
|----------------|----------------------|---------|--------------------|--------------------|-------------------------|
| BGR1-10 h (LB) | 5                    | 853.000 | 227.729            | A                  |                         |
| BGS2-10 h (LB) | 5                    | 673.000 | 126.911            | A                  | 0.2653                  |
| BGS9-10 h (LB) | 5                    | 830.800 | 331.679            | A                  | 0.8878                  |

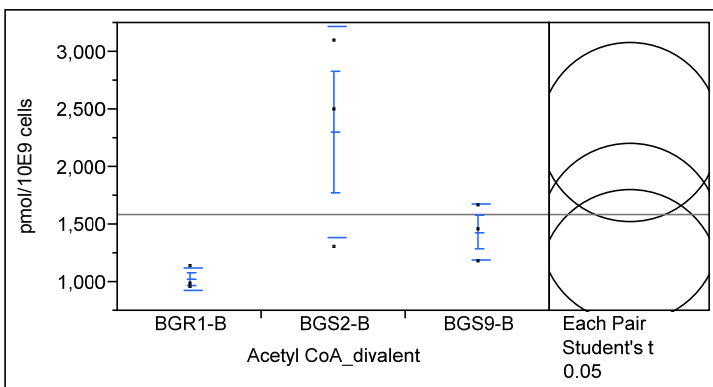

| Strain          | Number of replicates | Mean    | Standard deviation | Connecting Letters | p-value against control |
|-----------------|----------------------|---------|--------------------|--------------------|-------------------------|
| BGR1-10 h (BLB) | 3                    | 1031.00 | 94.726             | B                  |                         |
| BGS2-10 h (BLB) | 3                    | 2301.00 | 916.515            | A                  | 0.0301                  |
| BGS9-10 h (BLB) | 3                    | 1436.67 | 244.909            | AB                 | 0.4015                  |

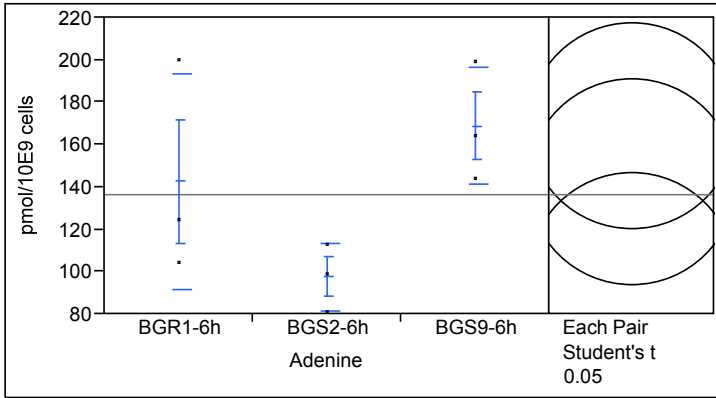

| Strain       | Number of replicates | Mean    | Standard deviation | Connecting Letters | p-value against control |
|--------------|----------------------|---------|--------------------|--------------------|-------------------------|
| BGR1-6h (LB) | 3                    | 142.667 | 50.6491            | AB                 |                         |
| BGS2-6h (LB) | 3                    | 97.667  | 16.0416            | B                  | 0.1626                  |
| BGS9-6h (LB) | 3                    | 169.000 | 27.8388            | A                  | 0.3876                  |

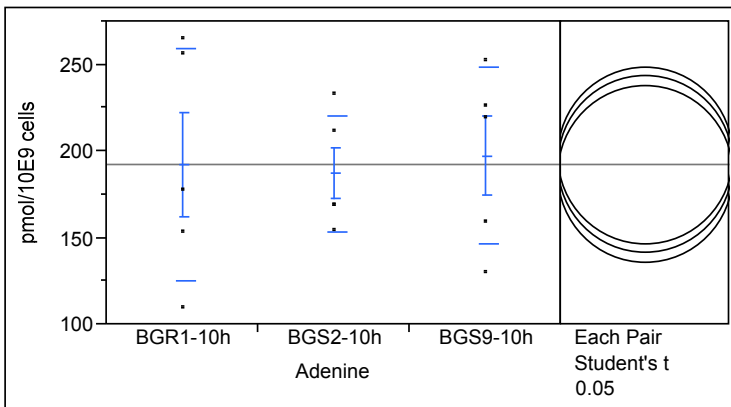

| Strain         | Number of replicates | Mean    | Standard deviation | Connecting Letters | p-value against control |
|----------------|----------------------|---------|--------------------|--------------------|-------------------------|
| BGR1-10 h (LB) | 5                    | 192.600 | 67.0694            | A                  |                         |
| BGS2-10 h (LB) | 5                    | 187.400 | 33.4559            | A                  | 0.8779                  |
| BGS9-10 h (LB) | 5                    | 197.600 | 51.0813            | A                  | 0.8825                  |

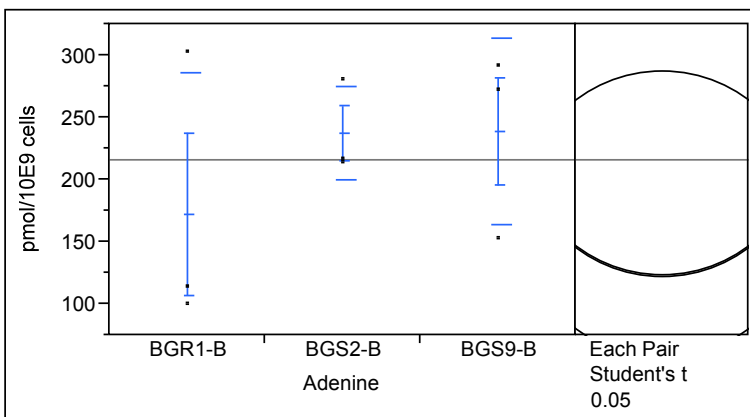

| Strain          | Number of replicates | Mean    | Standard deviation | Connecting Letters | p-value against control |
|-----------------|----------------------|---------|--------------------|--------------------|-------------------------|
| BGR1-10 h (BLB) | 3                    | 172.333 | 113.377            | A                  |                         |
| BGS2-10 h (BLB) | 3                    | 237.333 | 37.846             | A                  | 0.3659                  |
| BGS9-10 h (BLB) | 3                    | 238.667 | 74.795             | A                  | 0.3568                  |

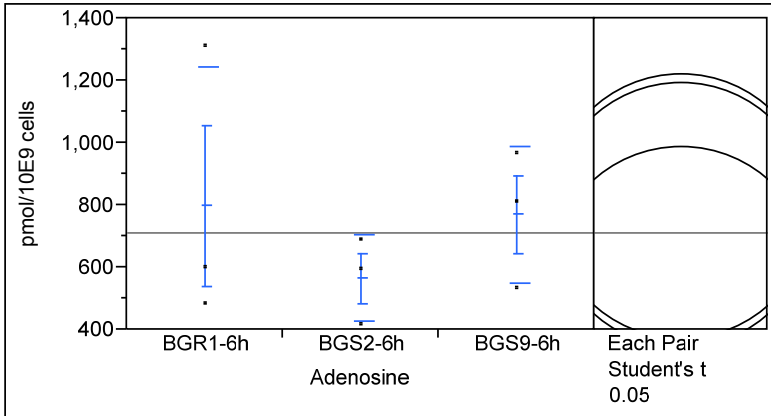

| Strain        | Number of replicates | Mean    | Standard deviation | Connecting Letters | p-value against control |
|---------------|----------------------|---------|--------------------|--------------------|-------------------------|
| BGR1-6 h (LB) | 3                    | 797.667 | 448.458            | A                  |                         |
| BGS2-6 h (LB) | 3                    | 566.333 | 139.880            | A                  | 0.3806                  |
| BGS9-6 h (LB) | 3                    | 770.000 | 219.748            | A                  | 0.9136                  |

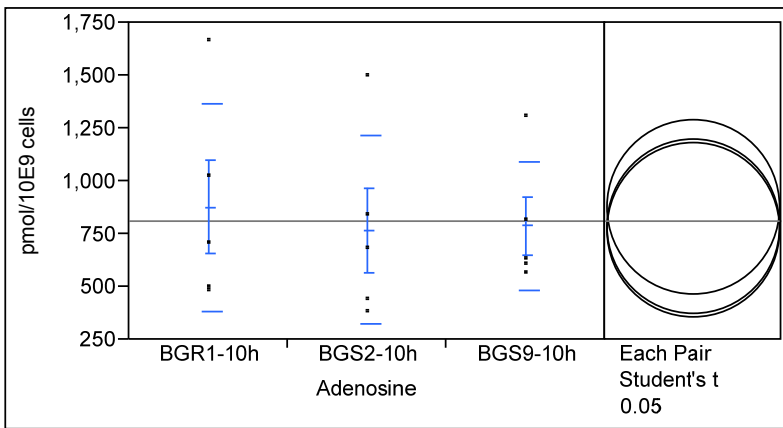

| Strain         | Number of replicates | Mean    | Standard deviation | Connecting Letters | p-value against control |
|----------------|----------------------|---------|--------------------|--------------------|-------------------------|
| BGR1-10 h (LB) | 5                    | 878.000 | 491.135            | A                  |                         |
| BGS2-10 h (LB) | 5                    | 769.400 | 446.677            | A                  | 0.6915                  |
| BGS9-10 h (LB) | 5                    | 788.400 | 307.088            | A                  | 0.7431                  |

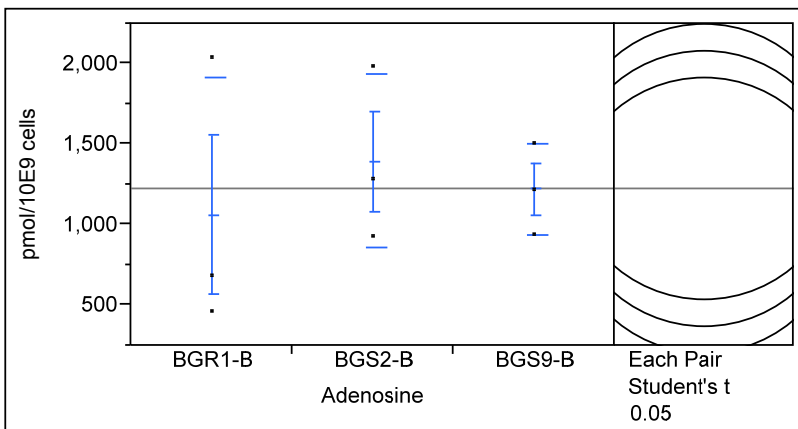

| Strain          | Number of replicates | Mean    | Standard deviation | Connecting Letters | p-value against control |
|-----------------|----------------------|---------|--------------------|--------------------|-------------------------|
| BGR1-10 h (BLB) | 3                    | 1062.33 | 856.918            | A                  |                         |
| BGS2-10 h (BLB) | 3                    | 1397.00 | 538.454            | A                  | 0.5244                  |
| BGS9-10 h (BLB) | 3                    | 1224.33 | 282.525            | A                  | 0.7547                  |



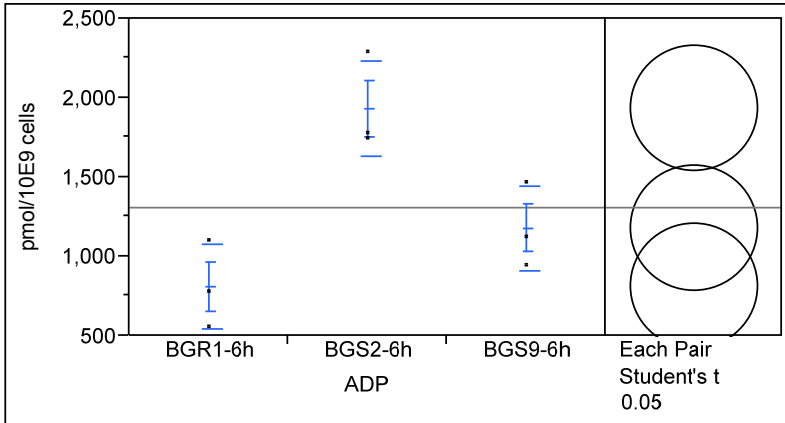

| Strain        | Number of replicates | Mean    | Standard deviation | Connecting Letters | p-value against control |
|---------------|----------------------|---------|--------------------|--------------------|-------------------------|
| BGR1-6 h (LB) | 3                    | 812.67  | 269.897            | B                  |                         |
| BGS2-6 h (LB) | 3                    | 1935.67 | 302.855            | A                  | 0.0027                  |
| BGS9-6 h (LB) | 3                    | 1181.00 | 265.157            | B                  | 0.1580                  |

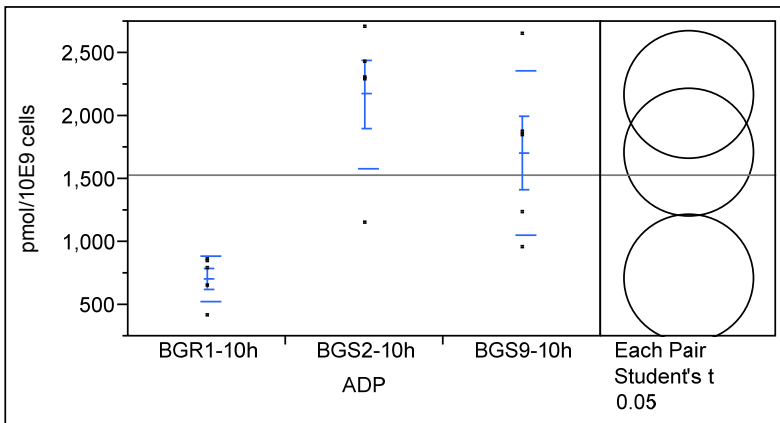

| Strain         | Number of replicates | Mean    | Standard deviation | Connecting Letters | p-value against control |
|----------------|----------------------|---------|--------------------|--------------------|-------------------------|
| BGR1-10 h (LB) | 5                    | 712.80  | 182.429            | B                  |                         |
| BGS2-10 h (LB) | 5                    | 2174.20 | 597.504            | A                  | 0.0008                  |
| BGS9-10 h (LB) | 5                    | 1712.20 | 654.220            | A                  | 0.0106                  |

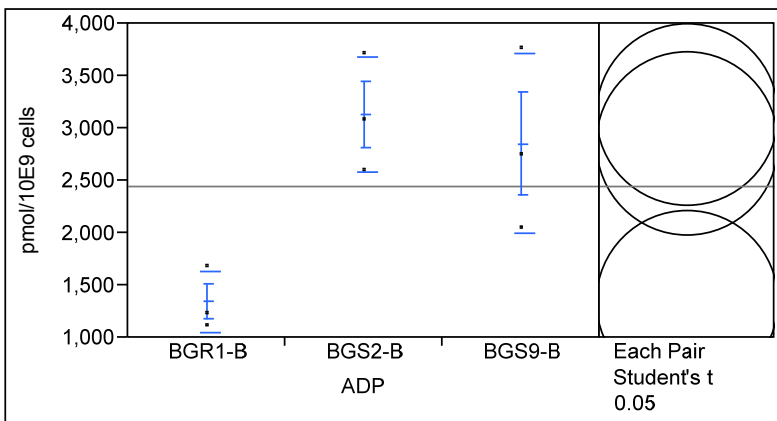

| Strain          | Number of replicates | Mean    | Standard deviation | Connecting Letters | p-value against control |
|-----------------|----------------------|---------|--------------------|--------------------|-------------------------|
| BGR1-10 h (BLB) | 3                    | 1345.33 | 291.790            | B                  |                         |
| BGS2-10 h (BLB) | 3                    | 3134.33 | 554.272            | A                  | 0.0120                  |
| BGS9-10 h (BLB) | 3                    | 2857.00 | 863.674            | A                  | 0.0238                  |

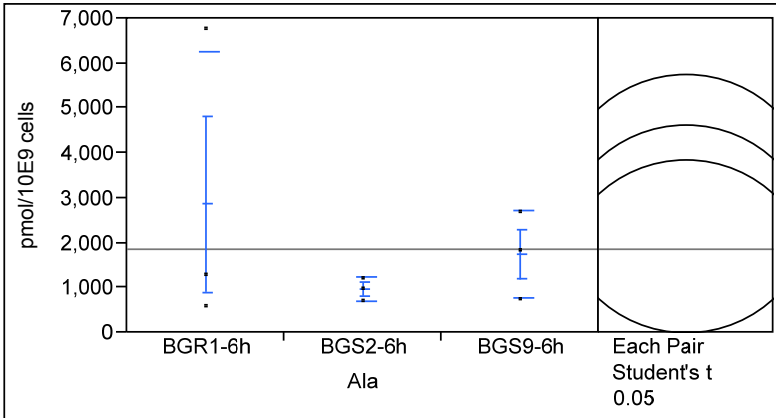

| Strain        | Number of replicates | Mean    | Standard deviation | Connecting Letters | p-value against control |
|---------------|----------------------|---------|--------------------|--------------------|-------------------------|
| BGR1-6 h (LB) | 3                    | 2869.33 | 3388.25            | A                  |                         |
| BGS2-6 h (LB) | 3                    | 970.33  | 254.96             | A                  | 0.2977                  |
| BGS9-6 h (LB) | 3                    | 1747.00 | 969.56             | A                  | 0.5255                  |

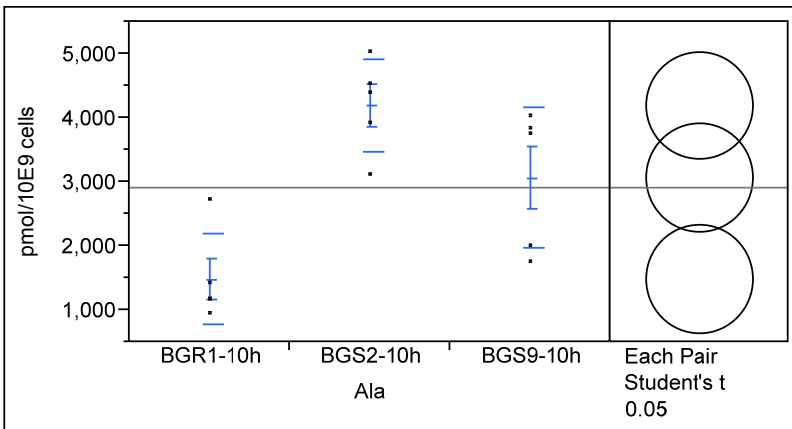

| Strain         | Number of replicates | Mean    | Standard deviation | Connecting Letters | p-value against control |
|----------------|----------------------|---------|--------------------|--------------------|-------------------------|
| BGR1-10 h (LB) | 5                    | 1479.80 | 715.56             | B                  |                         |
| BGS2-10 h (LB) | 5                    | 4193.00 | 718.02             | A                  | 0.0003                  |
| BGS9-10 h (LB) | 5                    | 3066.60 | 1103.99            | A                  | 0.0133                  |

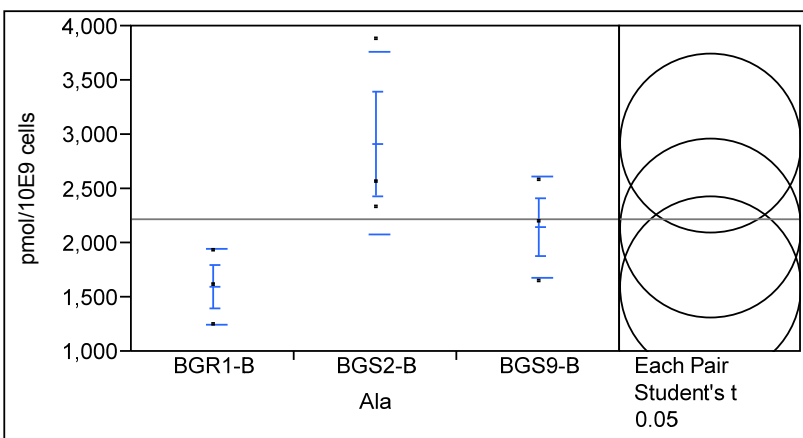

| Strain          | Number of replicates | Mean    | Standard deviation | Connecting Letters | p-value against control |
|-----------------|----------------------|---------|--------------------|--------------------|-------------------------|
| BGR1-10 h (BLB) | 3                    | 1600.33 | 344.840            | B                  |                         |
| BGS2-10 h (BLB) | 3                    | 2923.33 | 835.429            | A                  | 0.0327                  |
| BGS9-10 h (BLB) | 3                    | 2145.67 | 463.855            | AB                 | 0.2982                  |

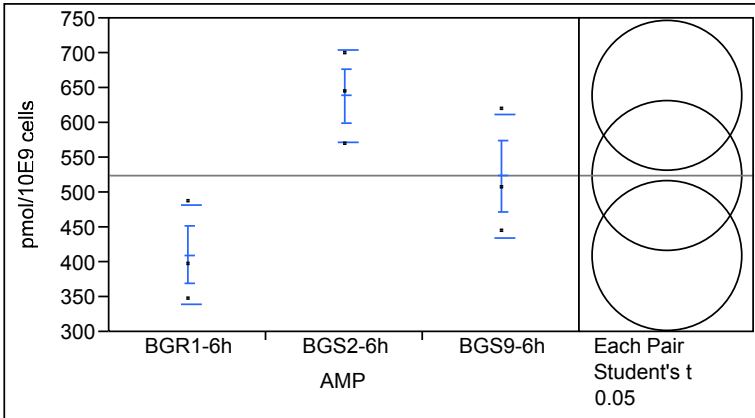

| Strain        | Number of replicates | Mean    | Standard deviation | Connecting Letters | p-value against control |
|---------------|----------------------|---------|--------------------|--------------------|-------------------------|
| BGR1-6 h (LB) | 3                    | 411.000 | 71.0422            | B                  |                         |
| BGS2-6 h (LB) | 3                    | 639.000 | 65.7799            | A                  | 0.0104                  |
| BGS9-6 h (LB) | 3                    | 524.000 | 89.0842            | AB                 | 0.1183                  |

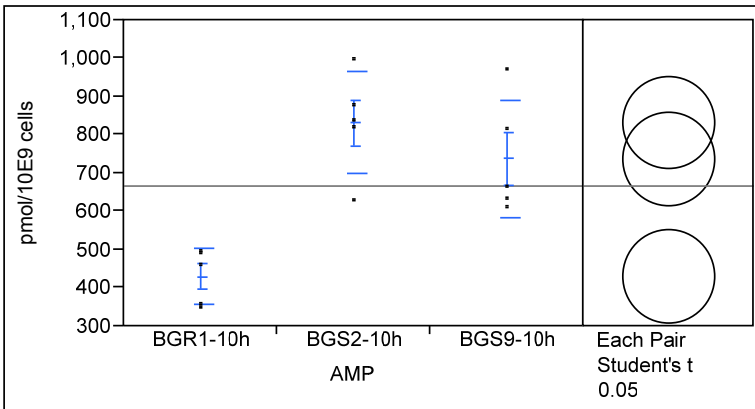

| Strain         | Number of replicates | Mean    | Standard deviation | Connecting Letters | p-value against control |
|----------------|----------------------|---------|--------------------|--------------------|-------------------------|
| BGR1-10 h (LB) | 5                    | 430.600 | 71.811             | B                  |                         |
| BGS2-10 h (LB) | 5                    | 832.400 | 134.091            | A                  | 0.0003                  |
| BGS9-10 h (LB) | 5                    | 738.000 | 151.821            | A                  | 0.0020                  |

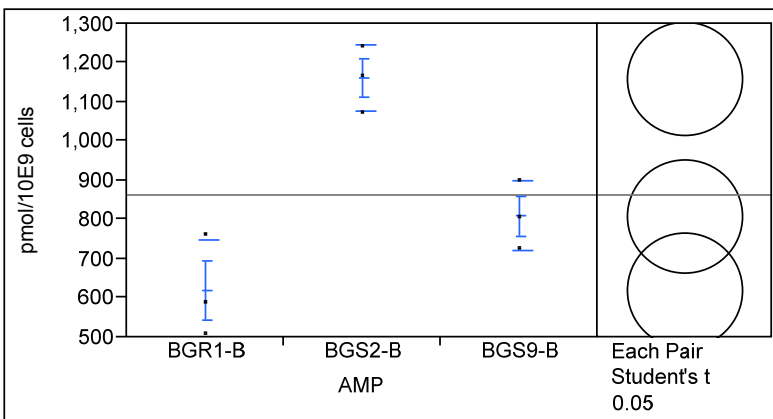

| Strain          | Number of replicates | Mean    | Standard deviation | Connecting Letters | p-value against control |
|-----------------|----------------------|---------|--------------------|--------------------|-------------------------|
| BGR1-10 h (BLB) | 3                    | 620.00  | 128.713            | B                  |                         |
| BGS2-10 h (BLB) | 3                    | 1161.00 | 84.717             | A                  | 0.0006                  |
| BGS9-10 h (BLB) | 3                    | 810.33  | 87.580             | B                  | 0.0630                  |

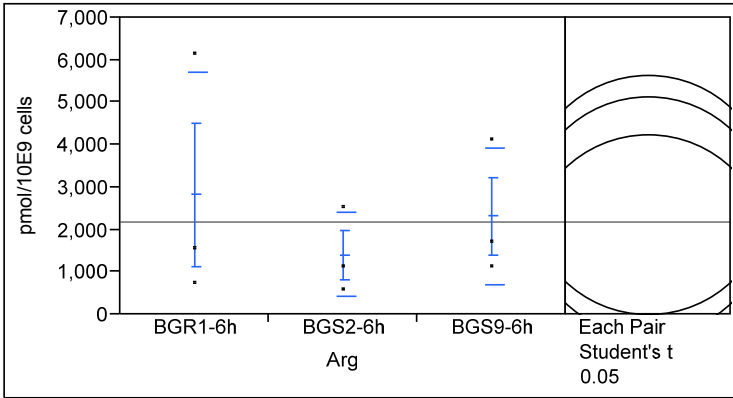

| Strain        | Number of replicates | Mean    | Standard deviation | Connecting Letters | p-value against control |
|---------------|----------------------|---------|--------------------|--------------------|-------------------------|
| BGR1-6 h (LB) | 3                    | 2820.67 | 2914.93            | A                  |                         |
| BGS2-6 h (LB) | 3                    | 1409.67 | 999.17             | A                  | 0.4221                  |
| BGS9-6 h (LB) | 3                    | 2317.00 | 1605.63            | A                  | 0.7689                  |

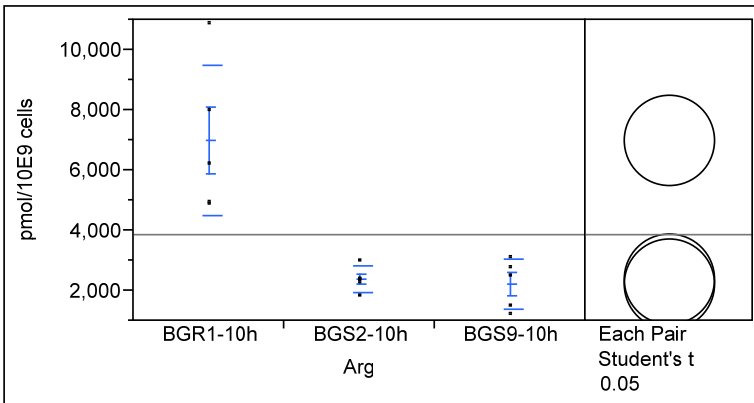

| Strain         | Number of replicates | Mean    | Standard deviation | Connecting Letters | p-value against control |
|----------------|----------------------|---------|--------------------|--------------------|-------------------------|
| BGR1-10 h (LB) | 5                    | 6997.80 | 2520.62            | A                  |                         |
| BGS2-10 h (LB) | 5                    | 2386.40 | 419.68             | B                  | 0.0005                  |
| BGS9-10 h (LB) | 5                    | 2222.40 | 810.07             | B                  | 0.0004                  |

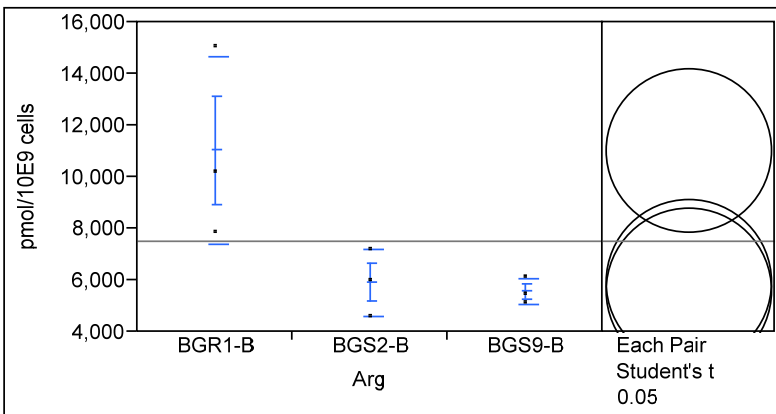

| Strain          | Number of replicates | Mean    | Standard deviation | Connecting Letters | p-value against control |
|-----------------|----------------------|---------|--------------------|--------------------|-------------------------|
| BGR1-10 h (BLB) | 3                    | 11033.3 | 3653.77            | A                  |                         |
| BGS2-10 h (BLB) | 3                    | 5928.7  | 1303.96            | B                  | 0.0325                  |
| BGS9-10 h (BLB) | 3                    | 5577.3  | 502.13             | B                  | 0.0253                  |

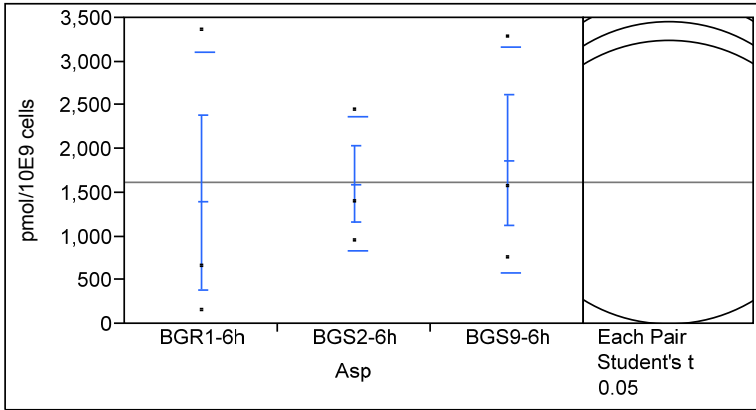

| Strain        | Number of replicates | Mean    | Standard deviation | Connecting Letters | p-value against control |
|---------------|----------------------|---------|--------------------|--------------------|-------------------------|
| BGR1-6 h (LB) | 3                    | 1392.00 | 1723.46            | A                  |                         |
| BGS2-6 h (LB) | 3                    | 1601.67 | 765.88             | A                  | 0.8522                  |
| BGS9-6 h (LB) | 3                    | 1871.67 | 1291.81            | A                  | 0.6718                  |

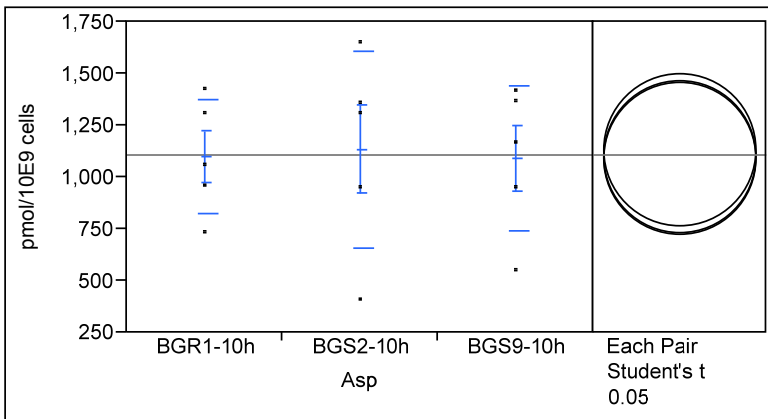

| Strain         | Number of replicates | Mean    | Standard deviation | Connecting Letters | p-value against control |
|----------------|----------------------|---------|--------------------|--------------------|-------------------------|
| BGR1-10 h (LB) | 5                    | 1098.40 | 274.367            | A                  |                         |
| BGS2-10 h (LB) | 5                    | 1134.20 | 476.214            | A                  | 0.8832                  |
| BGS9-10 h (LB) | 5                    | 1091.40 | 353.263            | A                  | 0.9771                  |

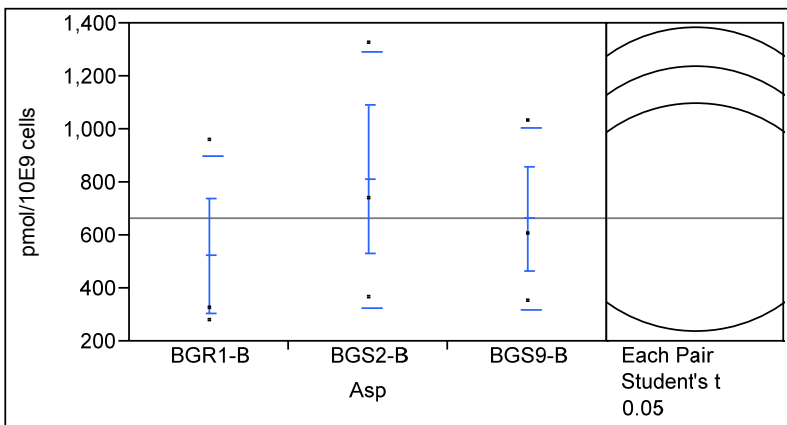

| Strain          | Number of replicates | Mean    | Standard deviation | Connecting Letters | p-value against control |
|-----------------|----------------------|---------|--------------------|--------------------|-------------------------|
| BGR1-10 h (BLB) | 3                    | 523.333 | 378.093            | A                  |                         |
| BGS2-10 h (BLB) | 3                    | 811.000 | 483.268            | A                  | 0.4187                  |
| BGS9-10 h (BLB) | 3                    | 664.000 | 342.959            | A                  | 0.6860                  |

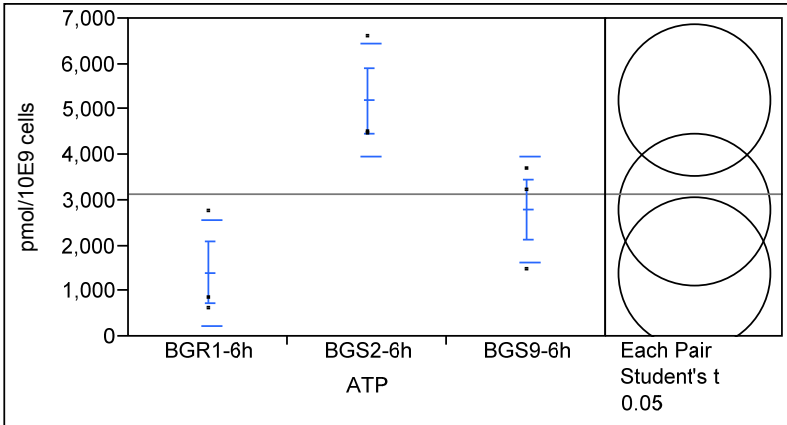

| Strain        | Number of replicates | Mean    | Standard deviation | Connecting Letters | p-value against control |
|---------------|----------------------|---------|--------------------|--------------------|-------------------------|
| BGR1-6 h (LB) | 3                    | 1411.67 | 1167.81            | B                  |                         |
| BGS2-6 h (LB) | 3                    | 5201.67 | 1235.57            | A                  | 0.0079                  |
| BGS9-6 h (LB) | 3                    | 2805.33 | 1159.91            | B                  | 0.2009                  |

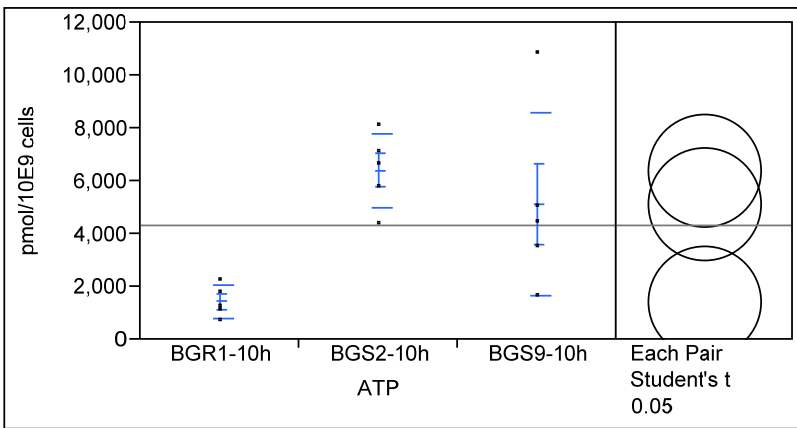

| Strain         | Number of replicates | Mean    | Standard deviation | Connecting Letters | p-value against control |
|----------------|----------------------|---------|--------------------|--------------------|-------------------------|
| BGR1-10 h (LB) | 5                    | 1434.40 | 606.94             | B                  |                         |
| BGS2-10 h (LB) | 5                    | 6425.40 | 1407.59            | A                  | 0.0035                  |
| BGS9-10 h (LB) | 5                    | 5124.60 | 3454.71            | A                  | 0.0203                  |

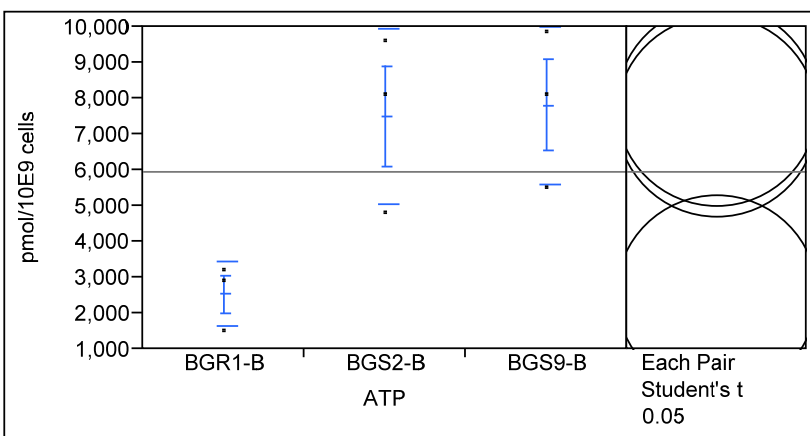

| Strain          | Number of replicates | Mean    | Standard deviation | Connecting Letters | p-value against control |
|-----------------|----------------------|---------|--------------------|--------------------|-------------------------|
| BGR1-10 h (BLB) | 3                    | 2536.00 | 907.94             | B                  |                         |
| BGS2-10 h (BLB) | 3                    | 7508.33 | 2450.71            | A                  | 0.0214                  |
| BGS9-10 h (BLB) | 3                    | 7807.00 | 2197.40            | A                  | 0.0169                  |

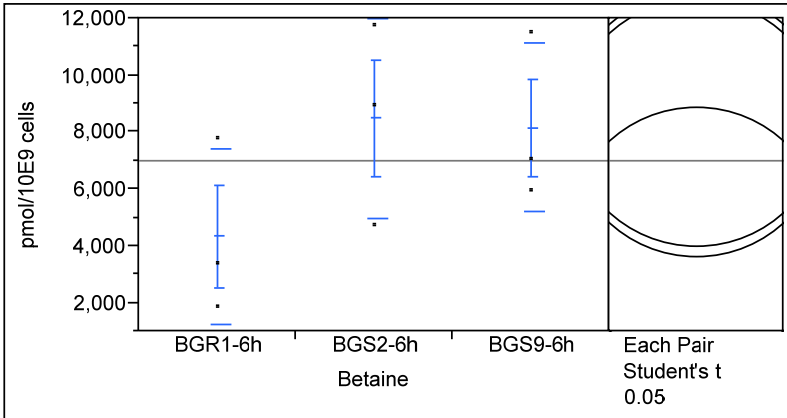

| Strain        | Number of replicates | Mean    | Standard deviation | Connecting Letters | p-value against control |
|---------------|----------------------|---------|--------------------|--------------------|-------------------------|
| BGR1-6 h (LB) | 3                    | 4336.67 | 3093.37            | A                  |                         |
| BGS2-6 h (LB) | 3                    | 8489.67 | 3520.74            | A                  | 0.1629                  |
| BGS9-6 h (LB) | 3                    | 8169.67 | 2953.99            | A                  | 0.1926                  |

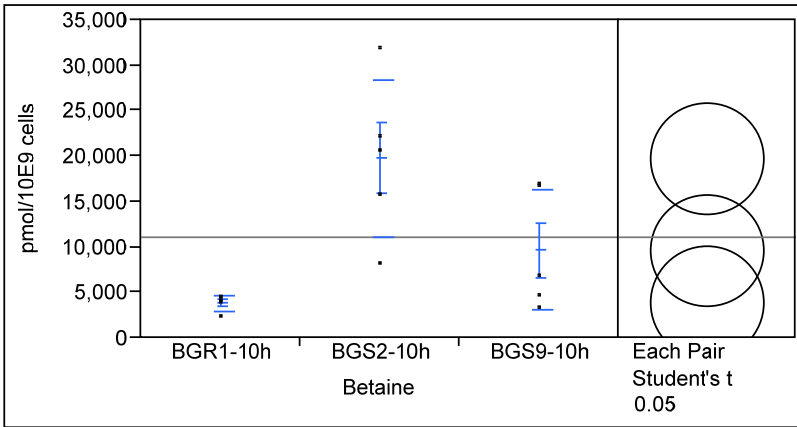

| Strain         | Number of replicates | Mean    | Standard deviation | Connecting Letters | p-value against control |
|----------------|----------------------|---------|--------------------|--------------------|-------------------------|
| BGR1-10 h (LB) | 5                    | 3857.0  | 845.27             | B                  |                         |
| BGS2-10 h (LB) | 5                    | 19755.8 | 8721.34            | A                  | 0.0019                  |
| BGS9-10 h (LB) | 5                    | 9636.6  | 6604.22            | B                  | 0.0266                  |

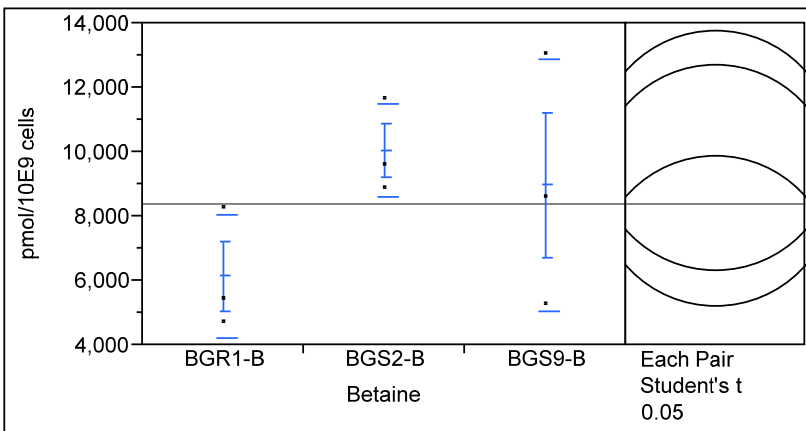

| Strain          | Number of replicates | Mean    | Standard deviation | Connecting Letters | p-value against control |
|-----------------|----------------------|---------|--------------------|--------------------|-------------------------|
| BGR1-10 h (BLB) | 3                    | 6140.0  | 1890.26            | A                  |                         |
| BGS2-10 h (BLB) | 3                    | 10059.0 | 1445.56            | A                  | 0.1192                  |
| BGS9-10 h (BLB) | 3                    | 8975.7  | 3910.07            | A                  | 0.2368                  |

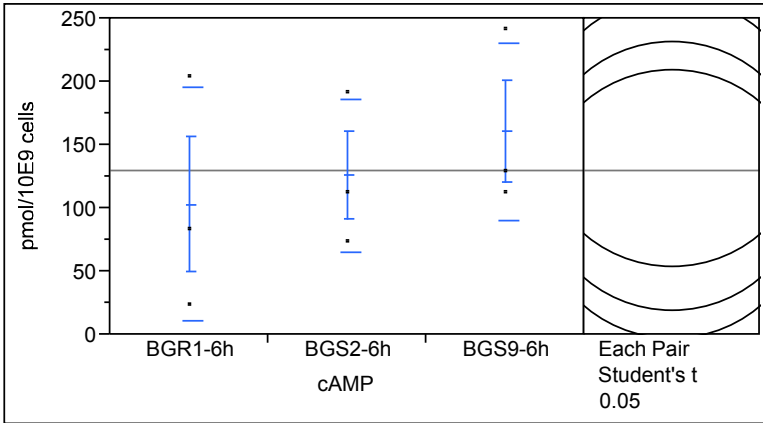

| Strain        | Number of replicates | Mean    | Standard deviation | Connecting Letters | p-value against control |
|---------------|----------------------|---------|--------------------|--------------------|-------------------------|
| BGR1-6 h (LB) | 3                    | 103.333 | 92.1973            | A                  |                         |
| BGS2-6 h (LB) | 3                    | 126.000 | 60.5558            | A                  | 0.7256                  |
| BGS9-6 h (LB) | 3                    | 160.667 | 70.0880            | A                  | 0.3880                  |

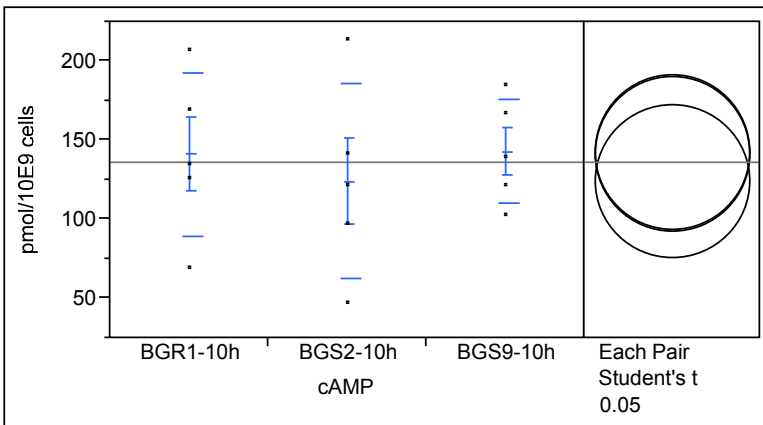

| Strain         | Number of replicates | Mean    | Standard deviation | Connecting Letters | p-value against control |
|----------------|----------------------|---------|--------------------|--------------------|-------------------------|
| BGR1-10 h (LB) | 5                    | 141.400 | 51.5781            | A                  |                         |
| BGS2-10 h (LB) | 5                    | 124.400 | 61.4109            | A                  | 0.6014                  |
| BGS9-10 h (LB) | 5                    | 143.200 | 33.1542            | A                  | 0.9556                  |

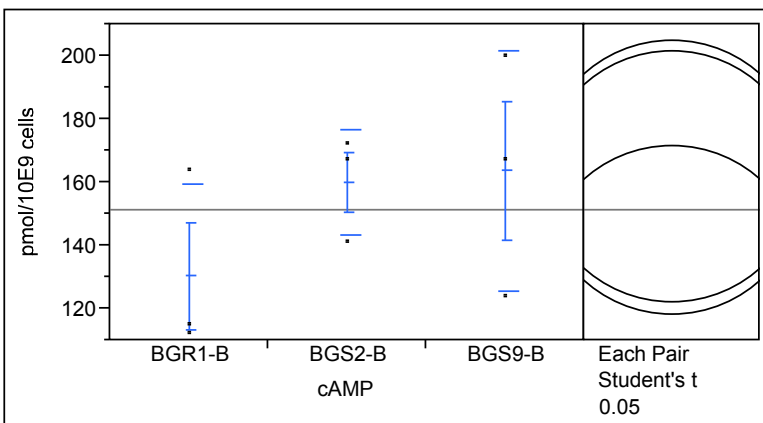

| Strain          | Number of replicates | Mean    | Standard deviation | Connecting Letters | p-value against control |
|-----------------|----------------------|---------|--------------------|--------------------|-------------------------|
| BGR1-10 h (BLB) | 3                    | 130.333 | 29.1947            | A                  |                         |
| BGS2-10 h (BLB) | 3                    | 160.000 | 16.6433            | A                  | 0.2618                  |
| BGS9-10 h (BLB) | 3                    | 163.667 | 38.1095            | A                  | 0.2134                  |



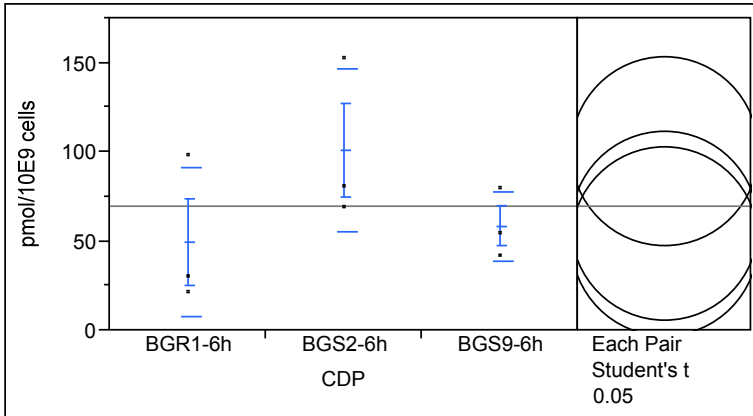

| Strain        | Number of replicates | Mean    | Standard deviation | Connecting Letters | p-value against control |
|---------------|----------------------|---------|--------------------|--------------------|-------------------------|
| BGR1-6 h (LB) | 3                    | 49.667  | 42.0991            | A                  |                         |
| BGS2-6 h (LB) | 3                    | 101.000 | 45.4313            | A                  | 0.1444                  |
| BGS9-6 h (LB) | 3                    | 58.667  | 19.4251            | A                  | 0.7786                  |

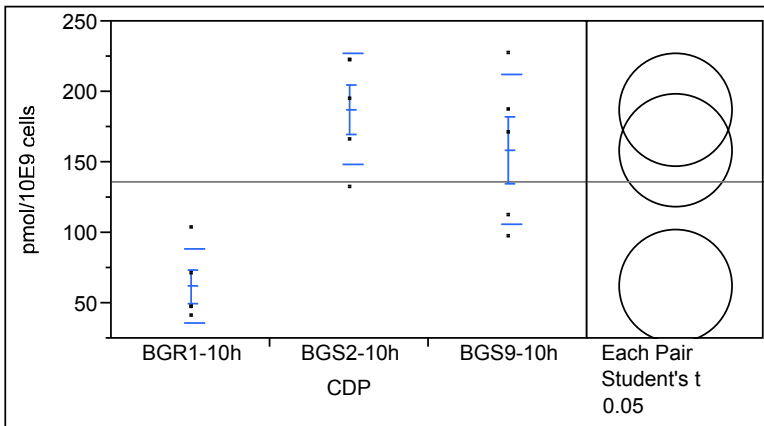

| Strain         | Number of replicates | Mean    | Standard deviation | Connecting Letters | p-value against control |
|----------------|----------------------|---------|--------------------|--------------------|-------------------------|
| BGR1-10 h (LB) | 5                    | 62.200  | 26.0135            | B                  |                         |
| BGS2-10 h (LB) | 5                    | 187.800 | 39.1114            | A                  | 0.0004                  |
| BGS9-10 h (LB) | 5                    | 159.200 | 53.3592            | A                  | 0.0028                  |

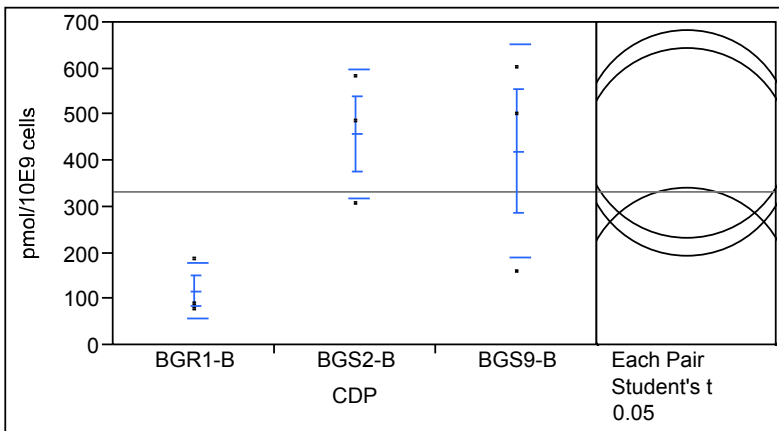

| Strain          | Number of replicates | Mean    | Standard deviation | Connecting Letters | p-value against control |
|-----------------|----------------------|---------|--------------------|--------------------|-------------------------|
| BGR1-10 h (BLB) | 3                    | 118.333 | 59.769             | B                  |                         |
| BGS2-10 h (BLB) | 3                    | 459.333 | 140.272            | A                  | 0.0399                  |
| BGS9-10 h (BLB) | 3                    | 421.333 | 230.825            | AB                 | 0.0592                  |

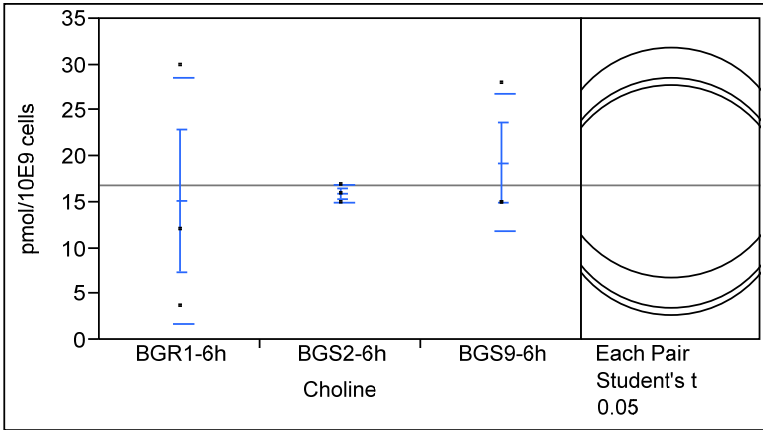

| Strain        | Number of replicates | Mean    | Standard deviation | Connecting Letters | p-value against control |
|---------------|----------------------|---------|--------------------|--------------------|-------------------------|
| BGR1-6 h (LB) | 3                    | 15.2333 | 13.4448            | A                  |                         |
| BGS2-6 h (LB) | 3                    | 16.0000 | 1.0000             | A                  | 0.9195                  |
| BGS9-6 h (LB) | 3                    | 19.3333 | 7.5056             | A                  | 0.5934                  |

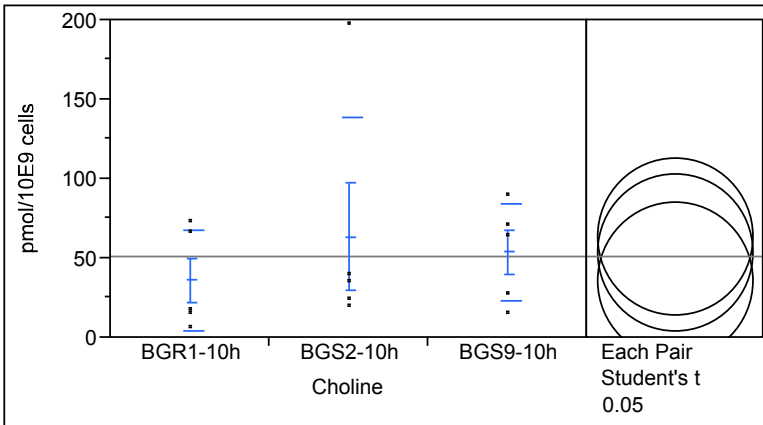

| Strain         | Number of replicates | Mean    | Standard deviation | Connecting Letters | p-value against control |
|----------------|----------------------|---------|--------------------|--------------------|-------------------------|
| BGR1-10 h (LB) | 5                    | 36.2000 | 31.2042            | A                  |                         |
| BGS2-10 h (LB) | 5                    | 63.6000 | 75.5831            | A                  | 0.4075                  |
| BGS9-10 h (LB) | 5                    | 54.0000 | 30.9273            | A                  | 0.5874                  |

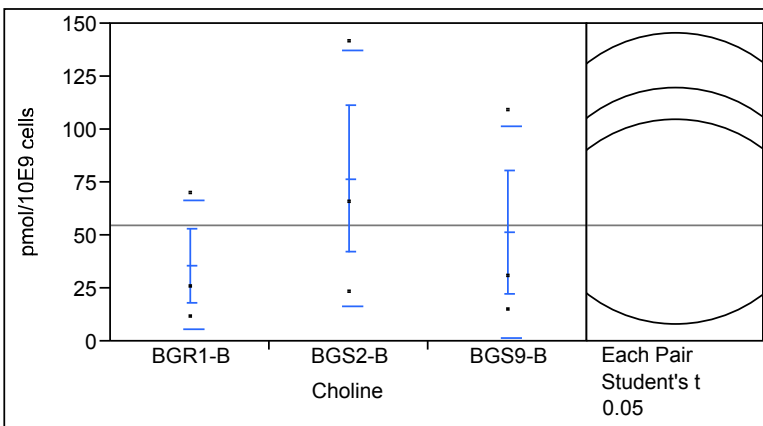

| Strain          | Number of replicates | Mean    | Standard deviation | Connecting Letters | p-value against control |
|-----------------|----------------------|---------|--------------------|--------------------|-------------------------|
| BGR1-10 h (BLB) | 3                    | 36.0000 | 30.2655            | A                  |                         |
| BGS2-10 h (BLB) | 3                    | 77.0000 | 60.2578            | A                  | 0.3410                  |
| BGS9-10 h (BLB) | 3                    | 51.6667 | 50.2925            | A                  | 0.7065                  |

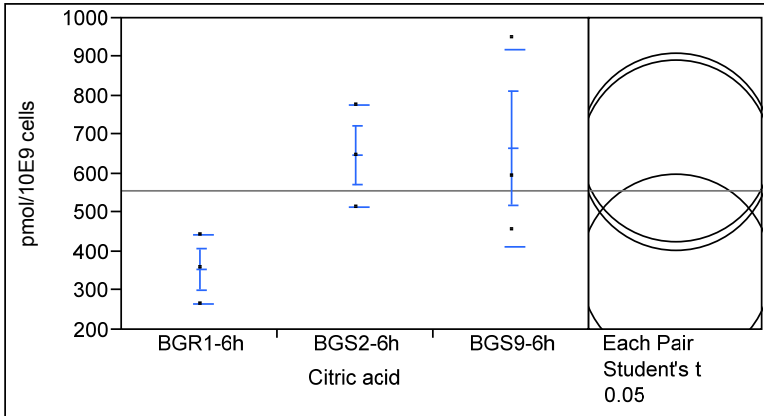

| Strain        | Number of replicates | Mean    | Standard deviation | Connecting Letters | p-value against control |
|---------------|----------------------|---------|--------------------|--------------------|-------------------------|
| BGR1-6 h (LB) | 3                    | 355.667 | 89.047             | A                  |                         |
| BGS2-6 h (LB) | 3                    | 648.333 | 131.508            | A                  | 0.0830                  |
| BGS9-6 h (LB) | 3                    | 668.333 | 253.097            | A                  | 0.0682                  |

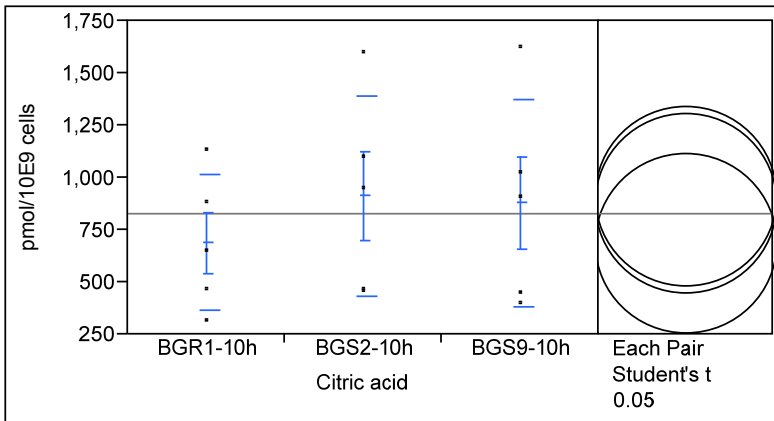

| Strain         | Number of replicates | Mean    | Standard deviation | Connecting Letters | p-value against control |
|----------------|----------------------|---------|--------------------|--------------------|-------------------------|
| BGR1-10 h (LB) | 5                    | 689.600 | 325.646            | A                  |                         |
| BGS2-10 h (LB) | 5                    | 913.800 | 480.613            | A                  | 0.4370                  |
| BGS9-10 h (LB) | 5                    | 882.000 | 495.992            | A                  | 0.5033                  |

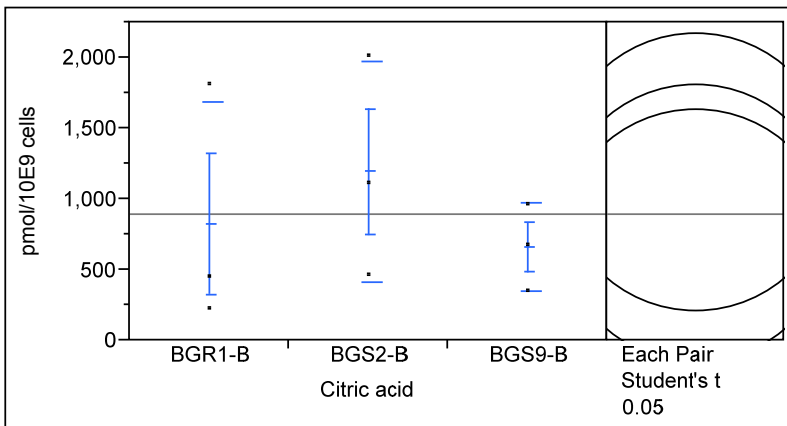

| Strain          | Number of replicates | Mean    | Standard deviation | Connecting Letters | p-value against control |
|-----------------|----------------------|---------|--------------------|--------------------|-------------------------|
| BGR1-10 h (BLB) | 3                    | 827.67  | 861.038            | A                  |                         |
| BGS2-10 h (BLB) | 3                    | 1194.67 | 777.567            | A                  | 0.5408                  |
| BGS9-10 h (BLB) | 3                    | 660.33  | 309.726            | A                  | 0.7775                  |

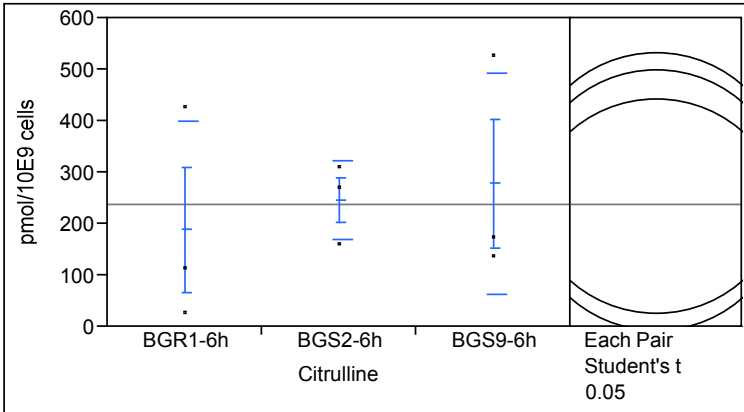

| Strain        | Number of replicates | Mean    | Standard deviation | Connecting Letters | p-value against control |
|---------------|----------------------|---------|--------------------|--------------------|-------------------------|
| BGR1-6 h (LB) | 3                    | 189.333 | 210.372            | A                  |                         |
| BGS2-6 h (LB) | 3                    | 246.667 | 77.675             | A                  | 0.7089                  |
| BGS9-6 h (LB) | 3                    | 278.667 | 214.871            | A                  | 0.5641                  |

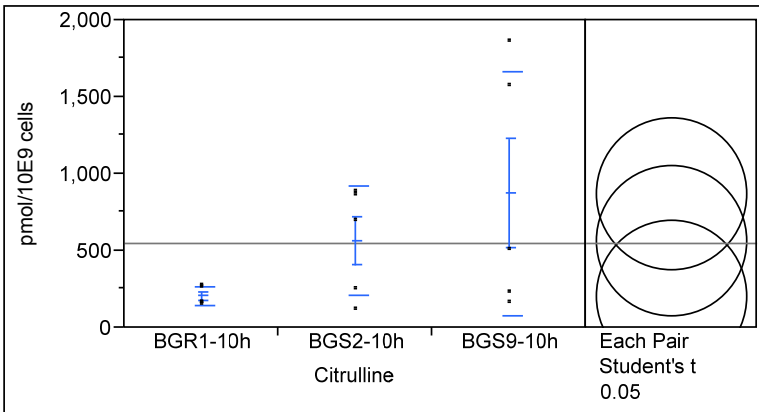

| Strain         | Number of replicates | Mean    | Standard deviation | Connecting Letters | p-value against control |
|----------------|----------------------|---------|--------------------|--------------------|-------------------------|
| BGR1-10 h (LB) | 5                    | 206.000 | 59.996             | A                  |                         |
| BGS2-10 h (LB) | 5                    | 566.800 | 359.086            | A                  | 0.2797                  |
| BGS9-10 h (LB) | 5                    | 873.200 | 793.166            | A                  | 0.0582                  |

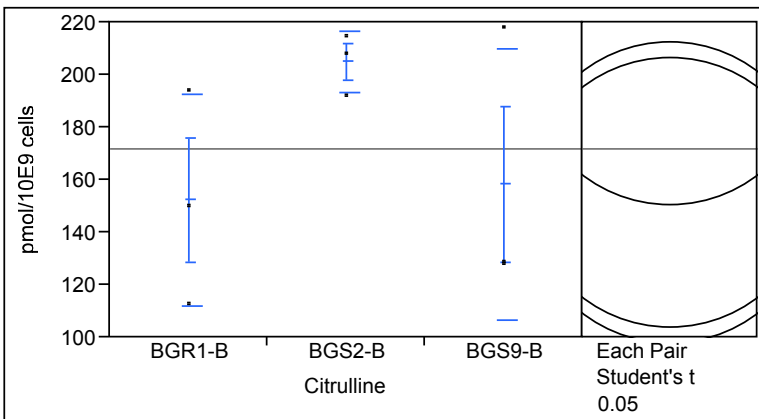

| Strain          | Number of replicates | Mean    | Standard deviation | Connecting Letters | p-value against control |
|-----------------|----------------------|---------|--------------------|--------------------|-------------------------|
| BGR1-10 h (BLB) | 3                    | 152.333 | 40.5504            | A                  |                         |
| BGS2-10 h (BLB) | 3                    | 205.000 | 11.7898            | A                  | 0.1451                  |
| BGS9-10 h (BLB) | 3                    | 158.333 | 51.6753            | A                  | 0.8550                  |

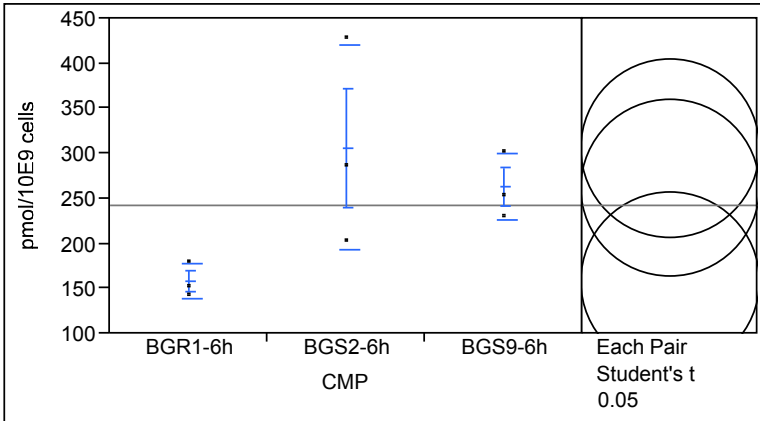

| Strain        | Number of replicates | Mean    | Standard deviation | Connecting Letters | p-value against control |
|---------------|----------------------|---------|--------------------|--------------------|-------------------------|
| BGR1-6 h (LB) | 3                    | 158.667 | 19.140             | B                  |                         |
| BGS2-6 h (LB) | 3                    | 306.333 | 113.870            | A                  | 0.0415                  |
| BGS9-6 h (LB) | 3                    | 262.667 | 36.774             | AB                 | 0.1185                  |

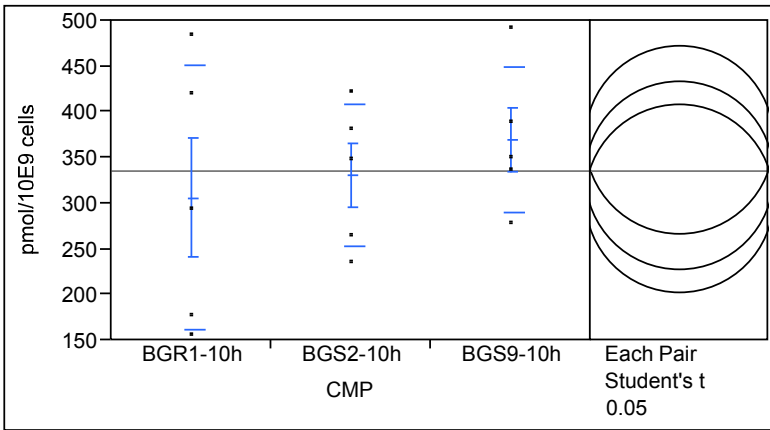

| Strain         | Number of replicates | Mean    | Standard deviation | Connecting Letters | p-value against control |
|----------------|----------------------|---------|--------------------|--------------------|-------------------------|
| BGR1-10 h (LB) | 5                    | 306.400 | 145.118            | A                  |                         |
| BGS2-10 h (LB) | 5                    | 330.800 | 78.532             | A                  | 0.7213                  |
| BGS9-10 h (LB) | 5                    | 369.400 | 79.122             | A                  | 0.3644                  |

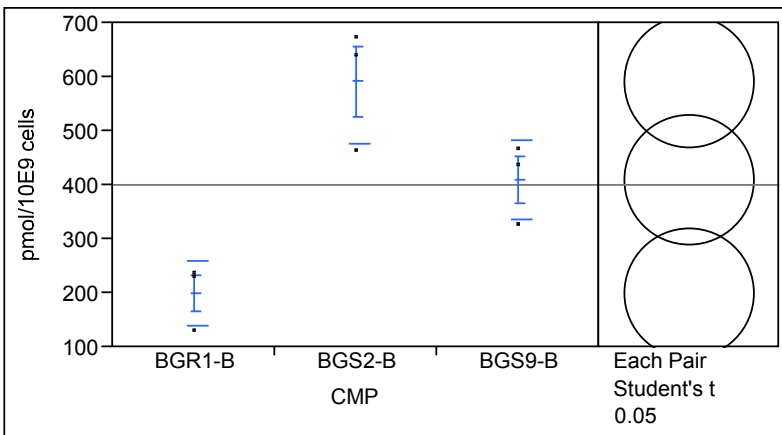

| Strain          | Number of replicates | Mean    | Standard deviation | Connecting Letters | p-value against control |
|-----------------|----------------------|---------|--------------------|--------------------|-------------------------|
| BGR1-10 h (BLB) | 3                    | 199.333 | 59.282             | C                  |                         |
| BGS2-10 h (BLB) | 3                    | 592.333 | 114.221            | A                  | 0.0013                  |
| BGS9-10 h (BLB) | 3                    | 410.333 | 73.514             | B                  | 0.0234                  |

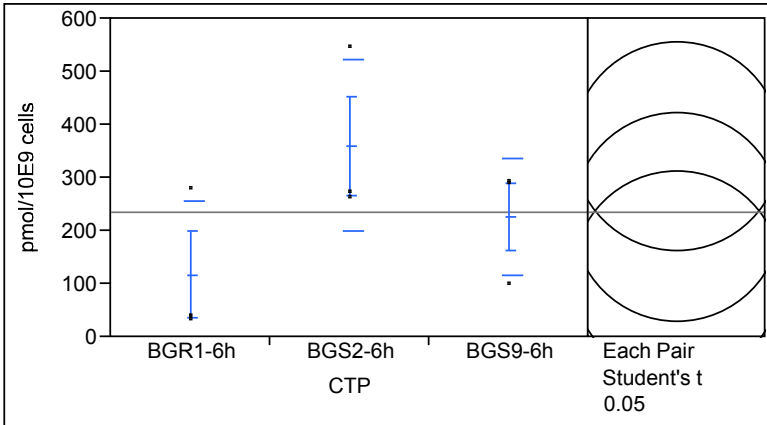

| Strain        | Number of replicates | Mean    | Standard deviation | Connecting Letters | p-value against control |
|---------------|----------------------|---------|--------------------|--------------------|-------------------------|
| BGR1-6 h (LB) | 3                    | 117.333 | 140.930            | A                  |                         |
| BGS2-6 h (LB) | 3                    | 361.000 | 161.158            | A                  | 0.0756                  |
| BGS9-6 h (LB) | 3                    | 227.667 | 110.564            | A                  | 0.3689                  |

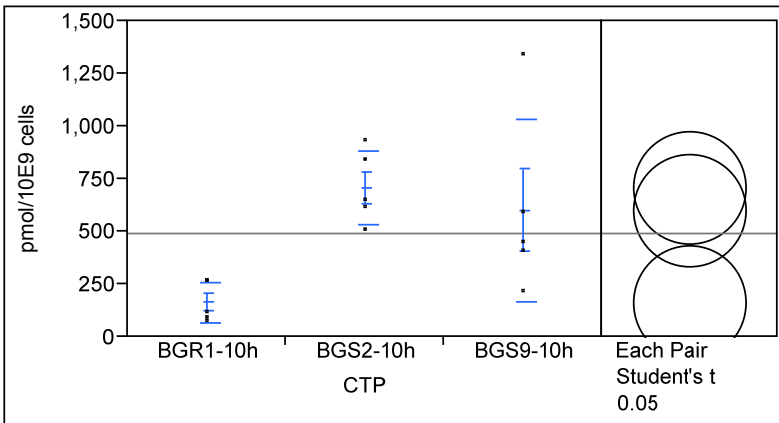

| Strain         | Number of replicates | Mean    | Standard deviation | Connecting Letters | p-value against control |
|----------------|----------------------|---------|--------------------|--------------------|-------------------------|
| BGR1-10 h (LB) | 5                    | 164.000 | 95.310             | B                  |                         |
| BGS2-10 h (LB) | 5                    | 709.000 | 173.478            | A                  | 0.0088                  |
| BGS9-10 h (LB) | 5                    | 601.600 | 435.374            | A                  | 0.0276                  |

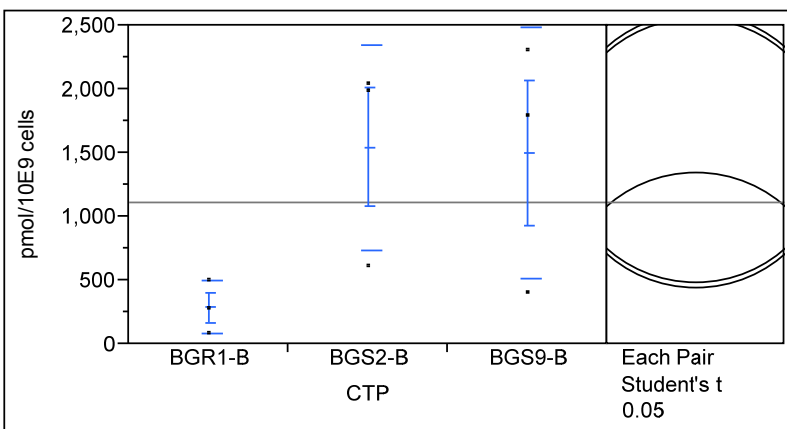

| Strain          | Number of replicates | Mean    | Standard deviation | Connecting Letters | p-value against control |
|-----------------|----------------------|---------|--------------------|--------------------|-------------------------|
| BGR1-10 h (BLB) | 3                    | 290.00  | 205.183            | A                  |                         |
| BGS2-10 h (BLB) | 3                    | 1544.33 | 808.810            | A                  | 0.0849                  |
| BGS9-10 h (BLB) | 3                    | 1501.00 | 985.097            | A                  | 0.0937                  |

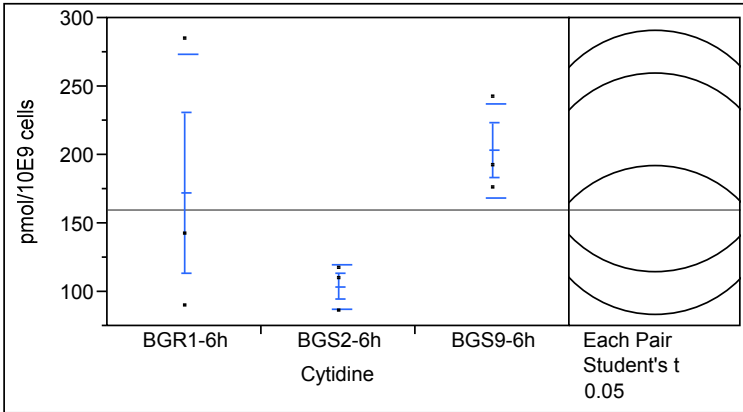

| Strain        | Number of replicates | Mean    | Standard deviation | Connecting Letters | p-value against control |
|---------------|----------------------|---------|--------------------|--------------------|-------------------------|
| BGR1-6 h (LB) | 3                    | 172.333 | 100.977            | A                  |                         |
| BGS2-6 h (LB) | 3                    | 104.333 | 16.258             | A                  | 0.2298                  |
| BGS9-6 h (LB) | 3                    | 203.333 | 34.429             | A                  | 0.5646                  |

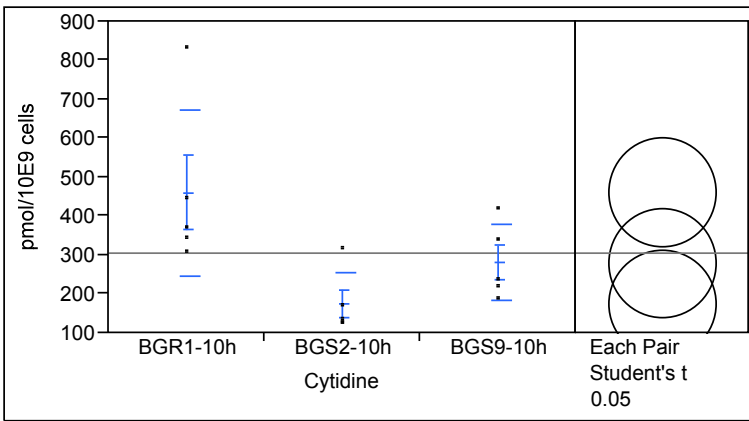

| Strain         | Number of replicates | Mean    | Standard deviation | Connecting Letters | p-value against control |
|----------------|----------------------|---------|--------------------|--------------------|-------------------------|
| BGR1-10 h (LB) | 5                    | 460.600 | 213.996            | A                  |                         |
| BGS2-10 h (LB) | 5                    | 175.600 | 80.792             | B                  | 0.0085                  |
| BGS9-10 h (LB) | 5                    | 281.000 | 97.501             | AB                 | 0.0713                  |

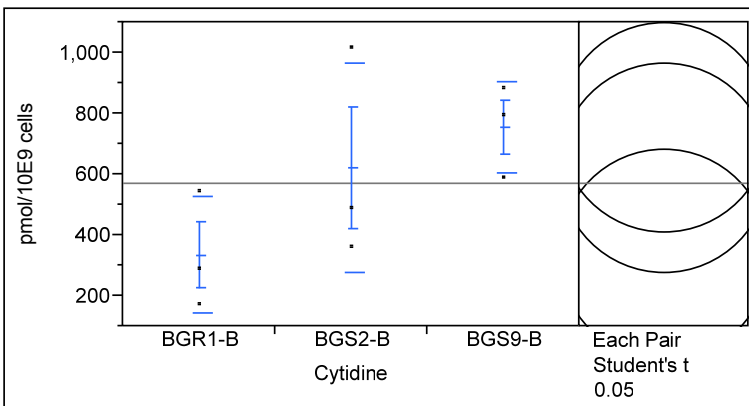

| Strain          | Number of replicates | Mean    | Standard deviation | Connecting Letters | p-value against control |
|-----------------|----------------------|---------|--------------------|--------------------|-------------------------|
| BGR1-10 h (BLB) | 3                    | 335.667 | 191.014            | A                  |                         |
| BGS2-10 h (BLB) | 3                    | 622.667 | 345.839            | A                  | 0.2002                  |
| BGS9-10 h (BLB) | 3                    | 755.000 | 151.318            | A                  | 0.0802                  |

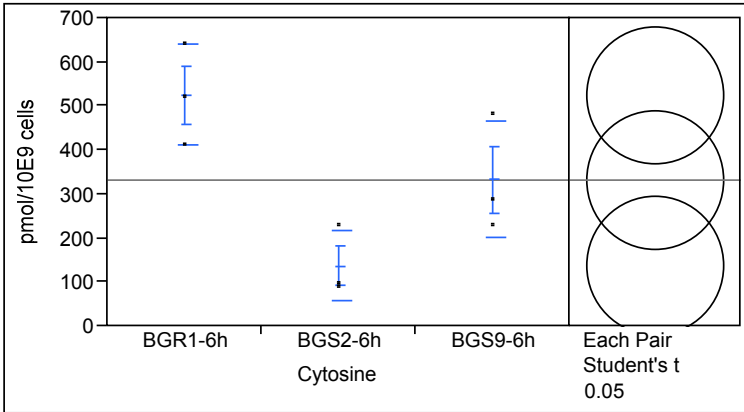

| Strain        | Number of replicates | Mean    | Standard deviation | Connecting Letters | p-value against control |
|---------------|----------------------|---------|--------------------|--------------------|-------------------------|
| BGR1-6 h (LB) | 3                    | 526.000 | 114.053            | A                  |                         |
| BGS2-6 h (LB) | 3                    | 138.000 | 78.886             | B                  | 0.0051                  |
| BGS9-6 h (LB) | 3                    | 333.000 | 131.936            | AB                 | 0.0763                  |

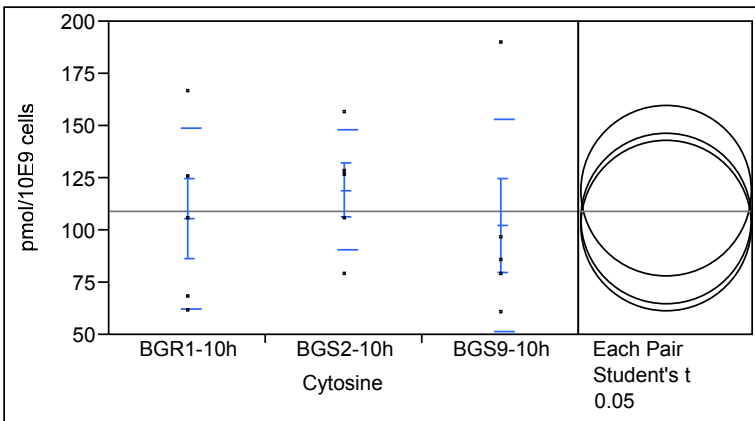

| Strain         | Number of replicates | Mean    | Standard deviation | Connecting Letters | p-value against control |
|----------------|----------------------|---------|--------------------|--------------------|-------------------------|
| BGR1-10 h (LB) | 5                    | 105.800 | 43.3036            | A                  |                         |
| BGS2-10 h (LB) | 5                    | 119.400 | 28.9707            | A                  | 0.6173                  |
| BGS9-10 h (LB) | 5                    | 102.600 | 50.5796            | A                  | 0.9059                  |

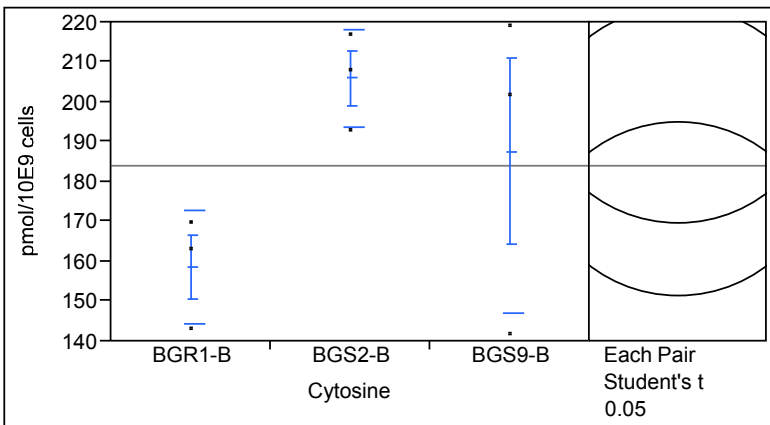

| Strain          | Number of replicates | Mean    | Standard deviation | Connecting Letters | p-value against control |
|-----------------|----------------------|---------|--------------------|--------------------|-------------------------|
| BGR1-10 h (BLB) | 3                    | 158.667 | 14.0119            | A                  |                         |
| BGS2-10 h (BLB) | 3                    | 206.000 | 12.1244            | A                  | 0.0648                  |
| BGS9-10 h (BLB) | 3                    | 187.667 | 40.4516            | A                  | 0.2160                  |



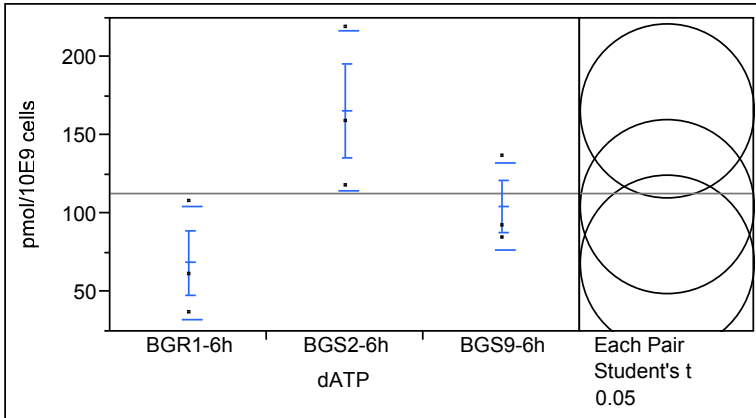

| Strain        | Number of replicates | Mean    | Standard deviation | Connecting Letters | p-value against control |
|---------------|----------------------|---------|--------------------|--------------------|-------------------------|
| BGR1-6 h (LB) | 3                    | 69.000  | 36.0139            | B                  |                         |
| BGS2-6 h (LB) | 3                    | 166.000 | 51.2640            | A                  | 0.0241                  |
| BGS9-6 h (LB) | 3                    | 105.000 | 28.0000            | AB                 | 0.3084                  |

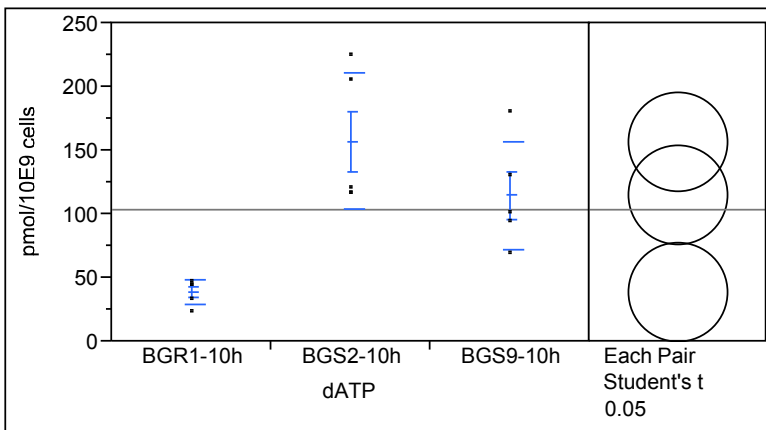

| Strain         | Number of replicates | Mean    | Standard deviation | Connecting Letters | p-value against control |
|----------------|----------------------|---------|--------------------|--------------------|-------------------------|
| BGR1-10 h (LB) | 5                    | 38.800  | 9.6799             | B                  |                         |
| BGS2-10 h (LB) | 5                    | 157.000 | 53.4416            | A                  | 0.0005                  |
| BGS9-10 h (LB) | 5                    | 115.000 | 42.5265            | A                  | 0.0106                  |

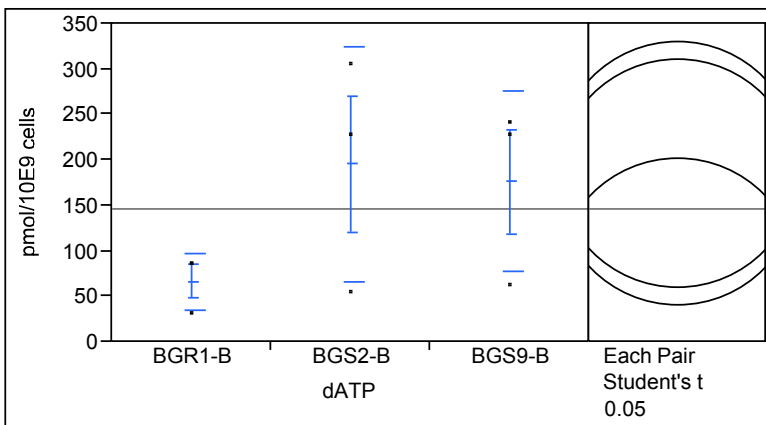

| Strain          | Number of replicates | Mean    | Standard deviation | Connecting Letters | p-value against control |
|-----------------|----------------------|---------|--------------------|--------------------|-------------------------|
| BGR1-10 h (BLB) | 3                    | 67.000  | 31.177             | A                  |                         |
| BGS2-10 h (BLB) | 3                    | 195.667 | 128.586            | A                  | 0.1504                  |
| BGS9-10 h (BLB) | 3                    | 176.667 | 99.551             | A                  | 0.2096                  |

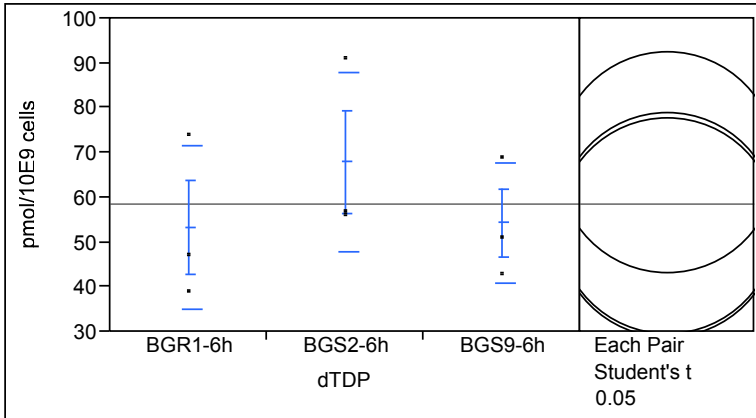

| Strain        | Number of replicates | Mean    | Standard deviation | Connecting Letters | p-value against control |
|---------------|----------------------|---------|--------------------|--------------------|-------------------------|
| BGR1-6 h (LB) | 3                    | 53.3333 | 18.3394            | A                  |                         |
| BGS2-6 h (LB) | 3                    | 68.0000 | 19.9249            | A                  | 0.3423                  |
| BGS9-6 h (LB) | 3                    | 54.3333 | 13.3167            | A                  | 0.9462                  |

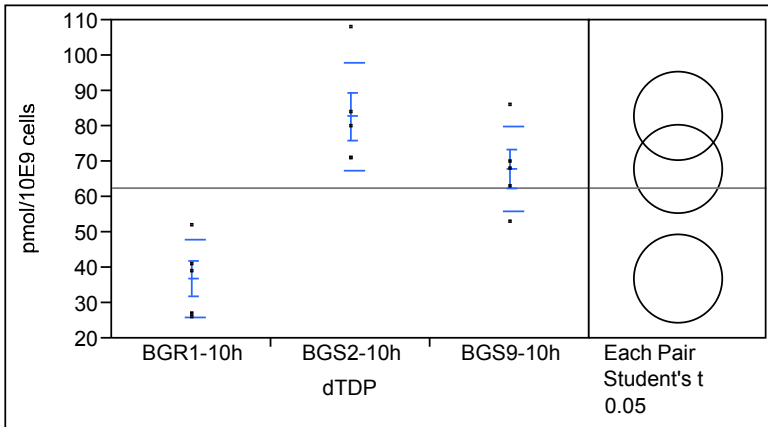

| Strain         | Number of replicates | Mean    | Standard deviation | Connecting Letters | p-value against control |
|----------------|----------------------|---------|--------------------|--------------------|-------------------------|
| BGR1-10 h (LB) | 5                    | 37.0000 | 10.7935            | B                  |                         |
| BGS2-10 h (LB) | 5                    | 82.8000 | 15.1888            | A                  | 0.0001                  |
| BGS9-10 h (LB) | 5                    | 68.0000 | 12.0208            | A                  | 0.0024                  |

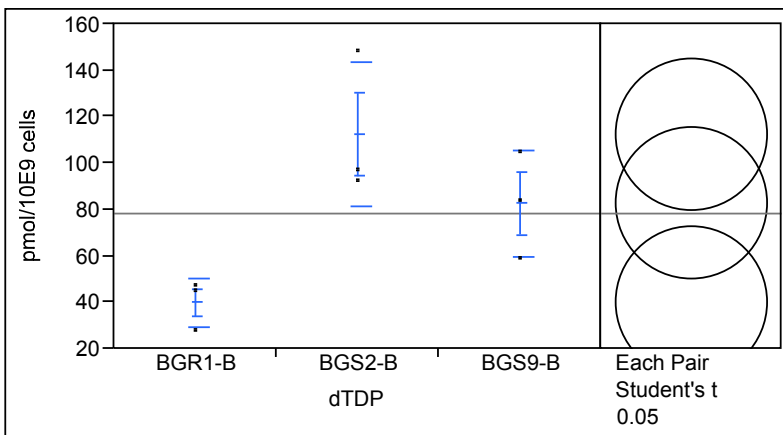

| Strain          | Number of replicates | Mean    | Standard deviation | Connecting Letters | p-value against control |
|-----------------|----------------------|---------|--------------------|--------------------|-------------------------|
| BGR1-10 h (BLB) | 3                    | 40.000  | 10.4403            | B                  |                         |
| BGS2-10 h (BLB) | 3                    | 112.333 | 30.9892            | A                  | 0.0086                  |
| BGS9-10 h (BLB) | 3                    | 82.667  | 23.0290            | AB                 | 0.0643                  |

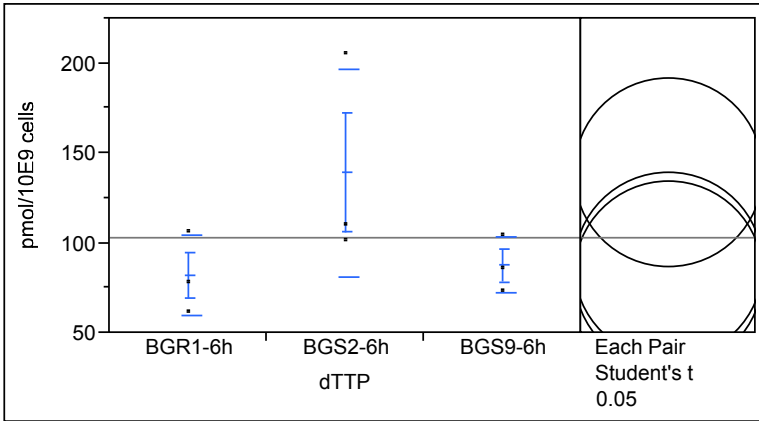

| Strain        | Number of replicates | Mean    | Standard deviation | Connecting Letters | p-value against control |
|---------------|----------------------|---------|--------------------|--------------------|-------------------------|
| BGR1-6 h (LB) | 3                    | 82.000  | 22.2711            | A                  |                         |
| BGS2-6 h (LB) | 3                    | 139.333 | 57.8734            | A                  | 0.1058                  |
| BGS9-6 h (LB) | 3                    | 87.667  | 15.5671            | A                  | 0.8571                  |

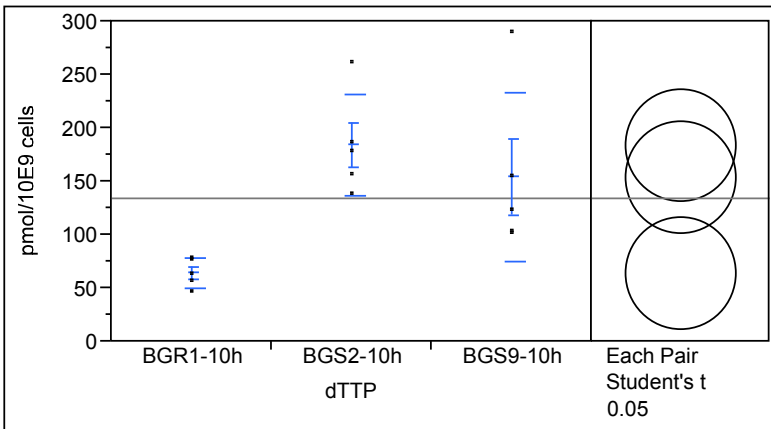

| Strain         | Number of replicates | Mean    | Standard deviation | Connecting Letters | p-value against control |
|----------------|----------------------|---------|--------------------|--------------------|-------------------------|
| BGR1-10 h (LB) | 5                    | 64.400  | 13.8492            | B                  |                         |
| BGS2-10 h (LB) | 5                    | 184.200 | 47.4679            | A                  | 0.0042                  |
| BGS9-10 h (LB) | 5                    | 154.400 | 78.8467            | A                  | 0.0212                  |

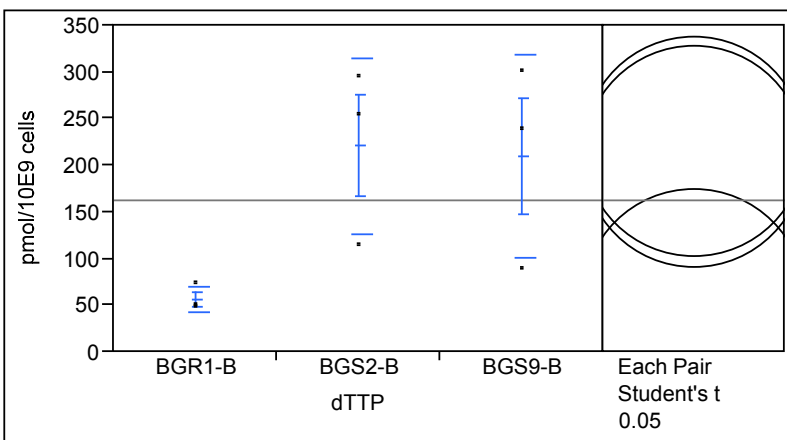

| Strain          | Number of replicates | Mean    | Standard deviation | Connecting Letters | p-value against control |
|-----------------|----------------------|---------|--------------------|--------------------|-------------------------|
| BGR1-10 h (BLB) | 3                    | 57.000  | 13.892             | A                  |                         |
| BGS2-10 h (BLB) | 3                    | 221.333 | 94.342             | A                  | 0.0523                  |
| BGS9-10 h (BLB) | 3                    | 210.000 | 108.448            | A                  | 0.0657                  |

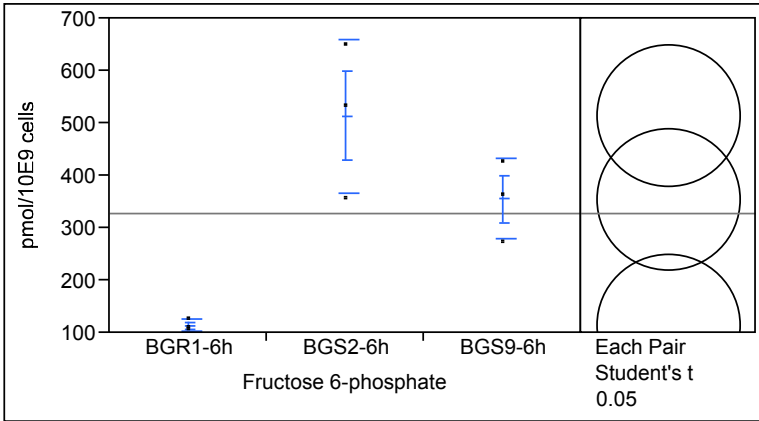

| Strain        | Number of replicates | Mean    | Standard deviation | Connecting Letters | p-value against control |
|---------------|----------------------|---------|--------------------|--------------------|-------------------------|
| BGR1-6 h (LB) | 3                    | 114.667 | 11.590             | B                  |                         |
| BGS2-6 h (LB) | 3                    | 514.000 | 146.632            | A                  | 0.0022                  |
| BGS9-6 h (LB) | 3                    | 355.333 | 76.957             | A                  | 0.0218                  |

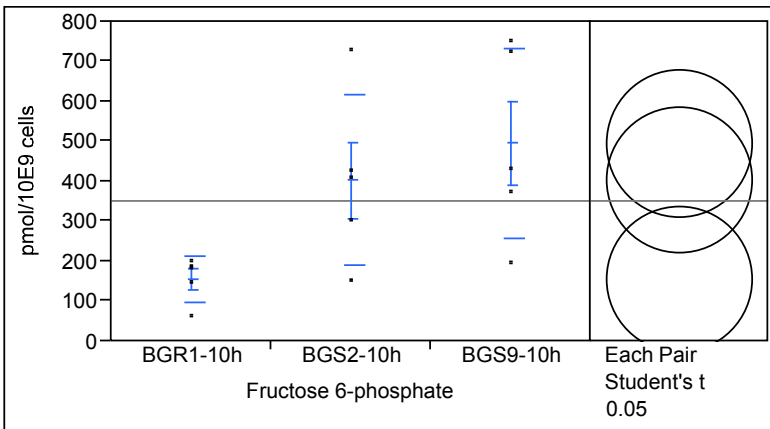

| Strain         | Number of replicates | Mean    | Standard deviation | Connecting Letters | p-value against control |
|----------------|----------------------|---------|--------------------|--------------------|-------------------------|
| BGR1-10 h (LB) | 5                    | 155.600 | 55.653             | B                  |                         |
| BGS2-10 h (LB) | 5                    | 403.600 | 213.036            | AB                 | 0.0582                  |
| BGS9-10 h (LB) | 5                    | 495.600 | 238.297            | A                  | 0.0141                  |

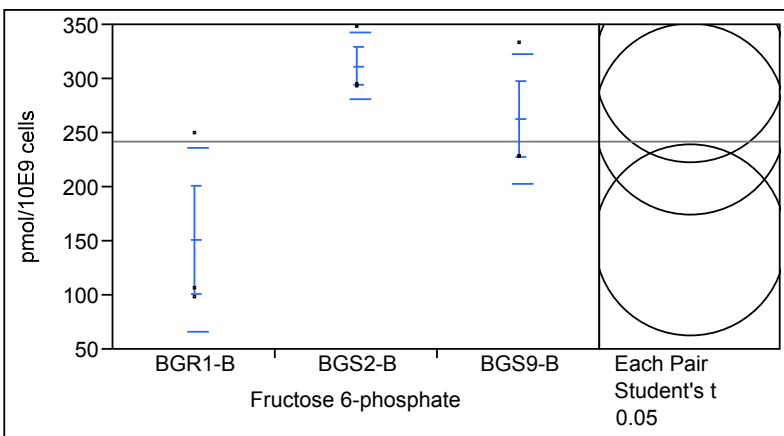

| Strain          | Number of replicates | Mean    | Standard deviation | Connecting Letters | p-value against control |
|-----------------|----------------------|---------|--------------------|--------------------|-------------------------|
| BGR1-10 h (BLB) | 3                    | 151.667 | 85.2311            | B                  |                         |
| BGS2-10 h (BLB) | 3                    | 312.333 | 30.8923            | A                  | 0.0203                  |
| BGS9-10 h (BLB) | 3                    | 263.333 | 60.3352            | AB                 | 0.0725                  |

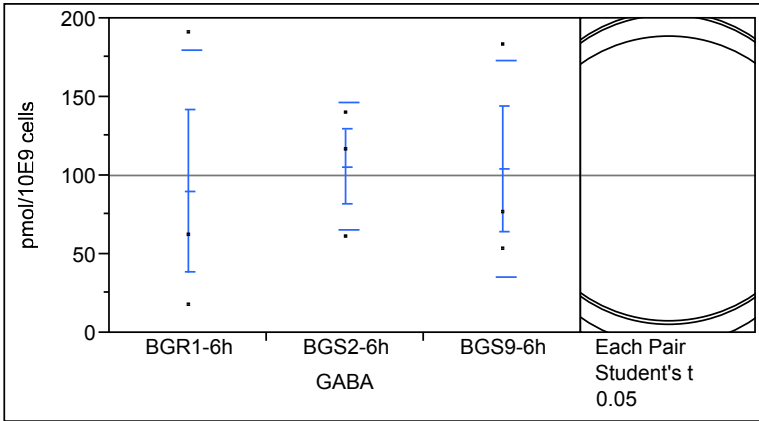

| Strain        | Number of replicates | Mean    | Standard deviation | Connecting Letters | p-value against control |
|---------------|----------------------|---------|--------------------|--------------------|-------------------------|
| BGR1-6 h (LB) | 3                    | 90.333  | 89.9129            | A                  |                         |
| BGS2-6 h (LB) | 3                    | 106.000 | 40.6325            | A                  | 0.7920                  |
| BGS9-6 h (LB) | 3                    | 104.333 | 69.1761            | A                  | 0.8135                  |

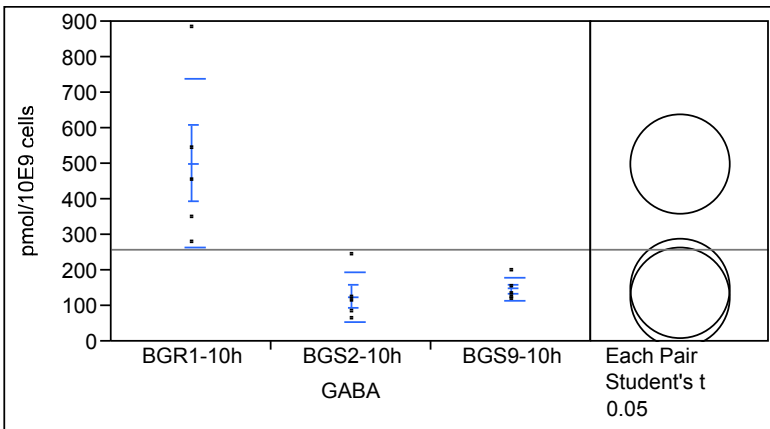

| Strain         | Number of replicates | Mean    | Standard deviation | Connecting Letters | p-value against control |
|----------------|----------------------|---------|--------------------|--------------------|-------------------------|
| BGR1-10 h (LB) | 5                    | 501.800 | 236.875            | A                  |                         |
| BGS2-10 h (LB) | 5                    | 127.000 | 70.168             | B                  | 0.0014                  |
| BGS9-10 h (LB) | 5                    | 147.800 | 32.112             | B                  | 0.0021                  |

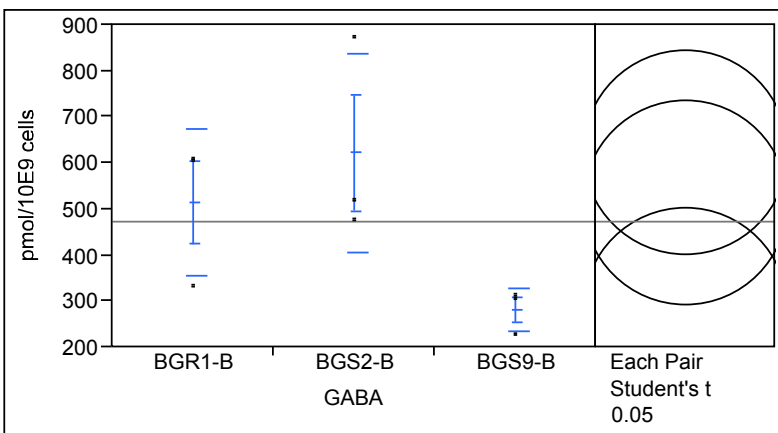

| Strain          | Number of replicates | Mean    | Standard deviation | Connecting Letters | p-value against control |
|-----------------|----------------------|---------|--------------------|--------------------|-------------------------|
| BGR1-10 h (BLB) | 3                    | 515.000 | 157.645            | AB                 |                         |
| BGS2-10 h (BLB) | 3                    | 622.333 | 216.278            | A                  | 0.4340                  |
| BGS9-10 h (BLB) | 3                    | 282.333 | 46.361             | B                  | 0.1191                  |

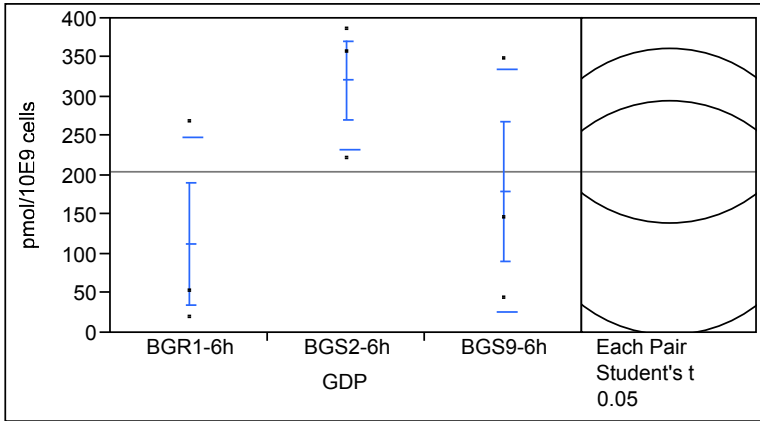

| Strain        | Number of replicates | Mean    | Standard deviation | Connecting Letters | p-value against control |
|---------------|----------------------|---------|--------------------|--------------------|-------------------------|
| BGR1-6 h (LB) | 3                    | 113.333 | 135.020            | A                  |                         |
| BGS2-6 h (LB) | 3                    | 321.667 | 87.523             | A                  | 0.0950                  |
| BGS9-6 h (LB) | 3                    | 180.333 | 154.717            | A                  | 0.5478                  |

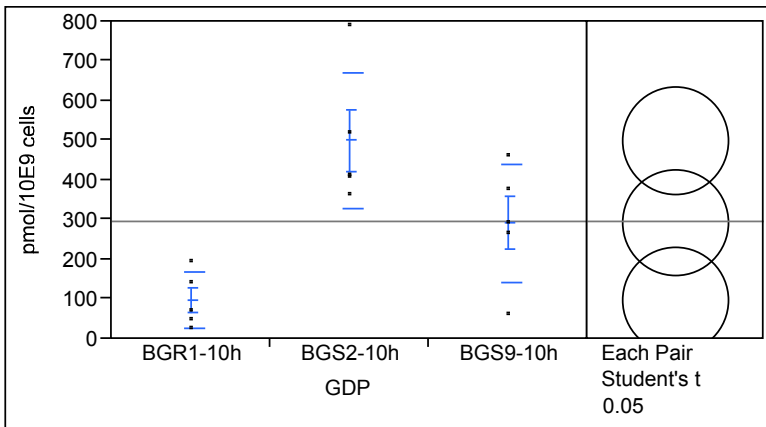

| Strain         | Number of replicates | Mean    | Standard deviation | Connecting Letters | p-value against control |
|----------------|----------------------|---------|--------------------|--------------------|-------------------------|
| BGR1-10 h (LB) | 5                    | 96.800  | 70.439             | C                  |                         |
| BGS2-10 h (LB) | 5                    | 500.000 | 171.483            | A                  | 0.0006                  |
| BGS9-10 h (LB) | 5                    | 292.600 | 149.412            | B                  | 0.0438                  |

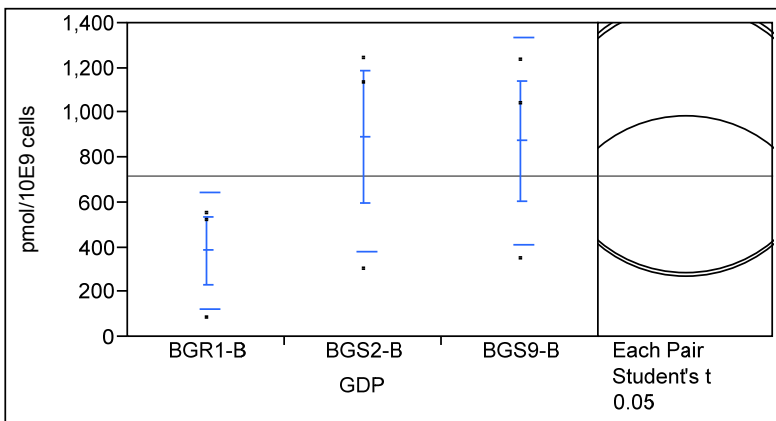

| Strain          | Number of replicates | Mean    | Standard deviation | Connecting Letters | p-value against control |
|-----------------|----------------------|---------|--------------------|--------------------|-------------------------|
| BGR1-10 h (BLB) | 3                    | 385.333 | 258.771            | A                  |                         |
| BGS2-10 h (BLB) | 3                    | 894.333 | 515.758            | A                  | 0.1949                  |
| BGS9-10 h (BLB) | 3                    | 875.667 | 463.455            | A                  | 0.2095                  |

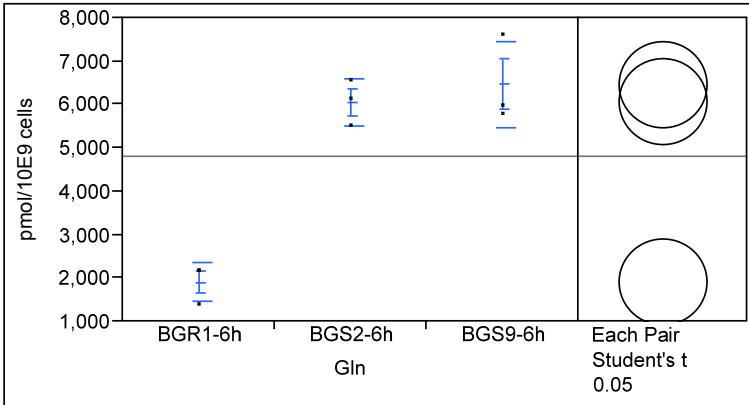

| Strain        | Number of replicates | Mean    | Standard deviation | Connecting Letters | p-value against control |
|---------------|----------------------|---------|--------------------|--------------------|-------------------------|
| BGR1-6 h (LB) | 3                    | 1912.00 | 436.55             | B                  |                         |
| BGS2-6 h (LB) | 3                    | 6065.00 | 534.85             | A                  | 0.0004                  |
| BGS9-6 h (LB) | 3                    | 6464.67 | 1009.13            | A                  | 0.0002                  |

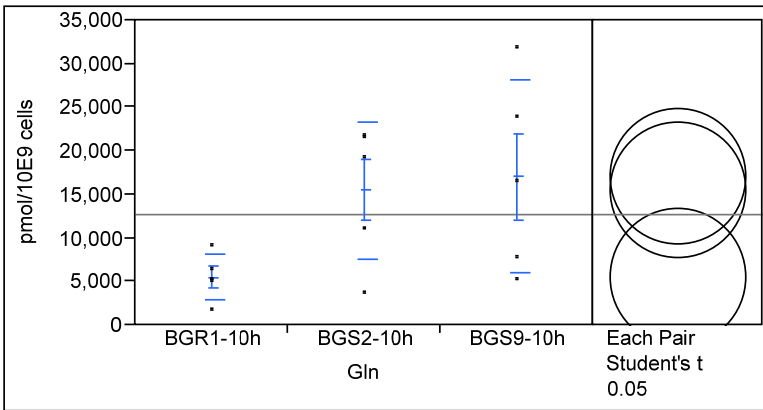

| Strain         | Number of replicates | Mean    | Standard deviation | Connecting Letters | p-value against control |
|----------------|----------------------|---------|--------------------|--------------------|-------------------------|
| BGR1-10 h (LB) | 5                    | 5534.2  | 2702.9             | B                  |                         |
| BGS2-10 h (LB) | 5                    | 15513.8 | 7912.6             | AB                 | 0.0728                  |
| BGS9-10 h (LB) | 5                    | 17082.2 | 11102.5            | A                  | 0.0420                  |

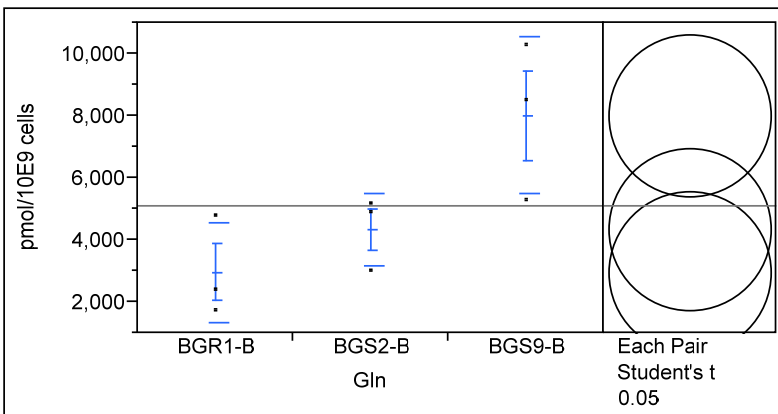

| Strain          | Number of replicates | Mean    | Standard deviation | Connecting Letters | p-value against control |
|-----------------|----------------------|---------|--------------------|--------------------|-------------------------|
| BGR1-10 h (BLB) | 3                    | 2954.00 | 1597.58            | B                  |                         |
| BGS2-10 h (BLB) | 3                    | 4352.67 | 1169.22            | AB                 | 0.3910                  |
| BGS9-10 h (BLB) | 3                    | 8001.67 | 2527.20            | A                  | 0.0157                  |

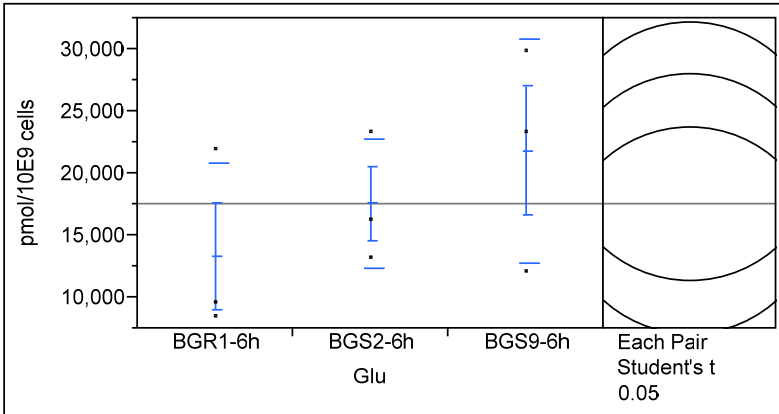

| Strain        | Number of replicates | Mean    | Standard deviation | Connecting Letters | p-value against control |
|---------------|----------------------|---------|--------------------|--------------------|-------------------------|
| BGR1-6 h (LB) | 3                    | 13340.7 | 7454.98            | A                  |                         |
| BGS2-6 h (LB) | 3                    | 17579.7 | 5189.87            | A                  | 0.5085                  |
| BGS9-6 h (LB) | 3                    | 21812.3 | 9010.66            | A                  | 0.2097                  |

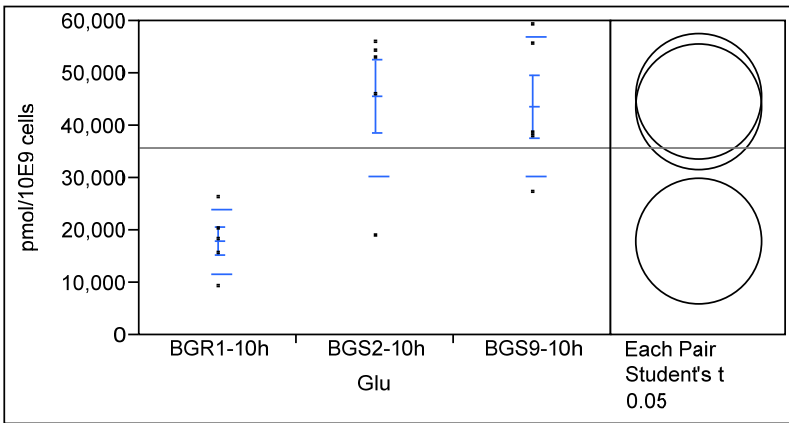

| Strain         | Number of replicates | Mean    | Standard deviation | Connecting Letters | p-value against control |
|----------------|----------------------|---------|--------------------|--------------------|-------------------------|
| BGR1-10 h (LB) | 5                    | 17941.8 | 6187.3             | B                  |                         |
| BGS2-10 h (LB) | 5                    | 45655.8 | 15332.8            | A                  | 0.0038                  |
| BGS9-10 h (LB) | 5                    | 43779.4 | 13353.6            | A                  | 0.0060                  |

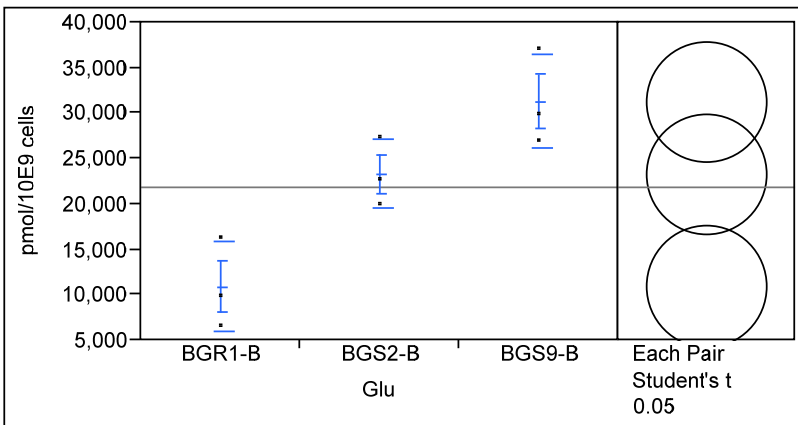

| Strain          | Number of replicates | Mean    | Standard deviation | Connecting Letters | p-value against control |
|-----------------|----------------------|---------|--------------------|--------------------|-------------------------|
| BGR1-10 h (BLB) | 3                    | 10926.7 | 5021.51            | B                  |                         |
| BGS2-10 h (BLB) | 3                    | 23349.7 | 3724.38            | A                  | 0.0175                  |
| BGS9-10 h (BLB) | 3                    | 31296.3 | 5168.15            | A                  | 0.0018                  |



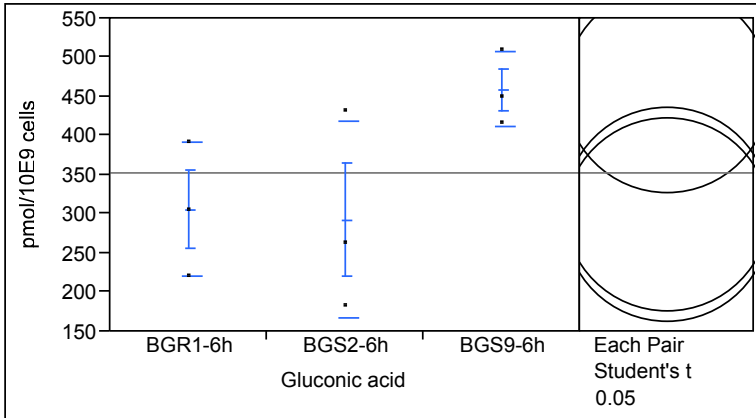

| Strain        | Number of replicates | Mean    | Standard deviation | Connecting Letters | p-value against control |
|---------------|----------------------|---------|--------------------|--------------------|-------------------------|
| BGR1-6 h (LB) | 3                    | 306.333 | 85.500             | A                  |                         |
| BGS2-6 h (LB) | 3                    | 293.333 | 126.575            | A                  | 0.8689                  |
| BGS9-6 h (LB) | 3                    | 459.000 | 47.791             | A                  | 0.0895                  |

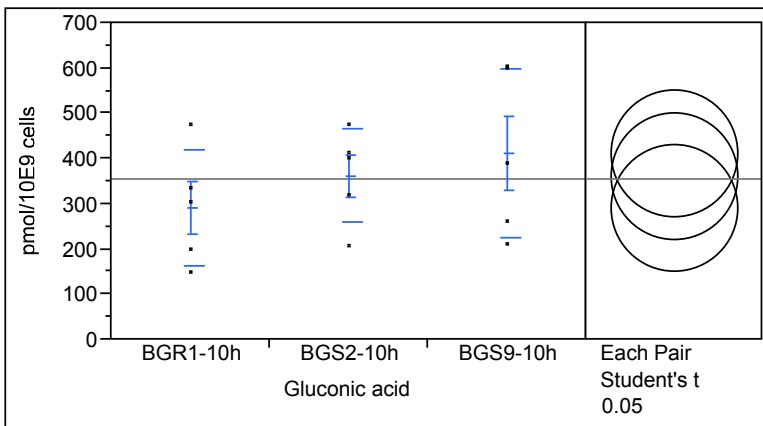

| Strain         | Number of replicates | Mean    | Standard deviation | Connecting Letters | p-value against control |
|----------------|----------------------|---------|--------------------|--------------------|-------------------------|
| BGR1-10 h (LB) | 5                    | 292.000 | 128.378            | A                  |                         |
| BGS2-10 h (LB) | 5                    | 362.200 | 102.634            | A                  | 0.4521                  |
| BGS9-10 h (LB) | 5                    | 412.200 | 184.848            | A                  | 0.2080                  |

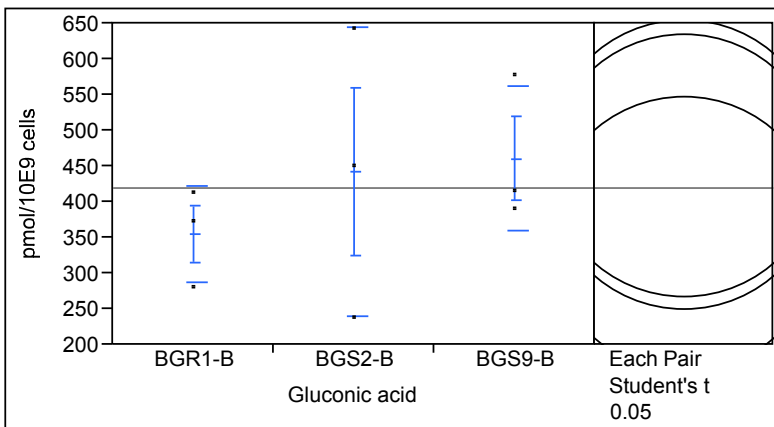

| Strain          | Number of replicates | Mean    | Standard deviation | Connecting Letters | p-value against control |
|-----------------|----------------------|---------|--------------------|--------------------|-------------------------|
| BGR1-10 h (BLB) | 3                    | 355.000 | 67.134             | A                  |                         |
| BGS2-10 h (BLB) | 3                    | 442.667 | 202.574            | A                  | 0.4616                  |
| BGS9-10 h (BLB) | 3                    | 461.000 | 101.975            | A                  | 0.3785                  |

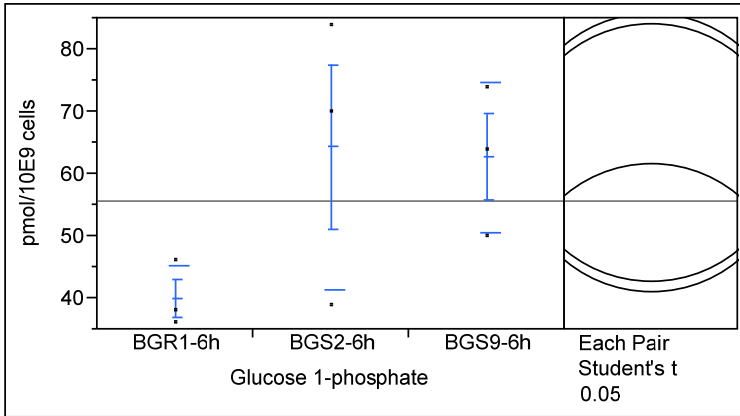

| Strain        | Number of replicates | Mean    | Standard deviation | Connecting Letters | p-value against control |
|---------------|----------------------|---------|--------------------|--------------------|-------------------------|
| BGR1-6 h (LB) | 3                    | 40.0000 | 5.2915             | A                  |                         |
| BGS2-6 h (LB) | 3                    | 64.3333 | 23.0290            | A                  | 0.0996                  |
| BGS9-6 h (LB) | 3                    | 62.6667 | 12.0554            | A                  | 0.1198                  |

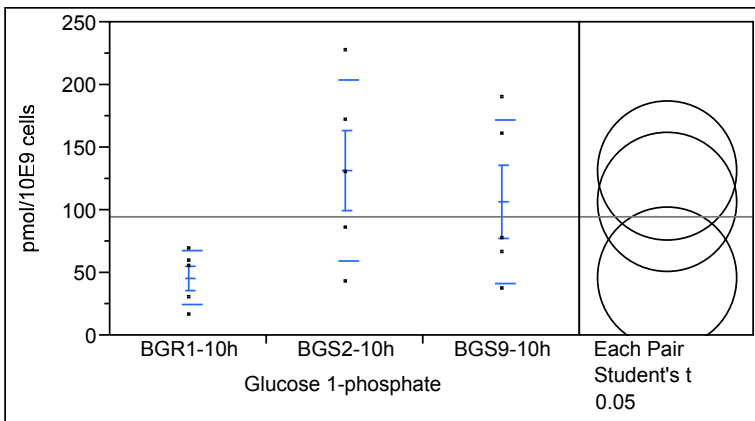

| Strain         | Number of replicates | Mean    | Standard deviation | Connecting Letters | p-value against control |
|----------------|----------------------|---------|--------------------|--------------------|-------------------------|
| BGR1-10 h (LB) | 5                    | 46.200  | 21.8105            | B                  |                         |
| BGS2-10 h (LB) | 5                    | 131.800 | 72.2094            | A                  | 0.0366                  |
| BGS9-10 h (LB) | 5                    | 106.800 | 65.2051            | AB                 | 0.1219                  |

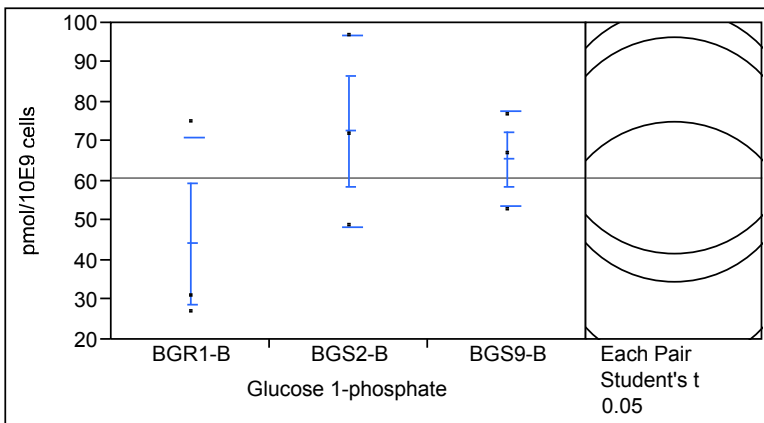

| Strain          | Number of replicates | Mean    | Standard deviation | Connecting Letters | p-value against control |
|-----------------|----------------------|---------|--------------------|--------------------|-------------------------|
| BGR1-10 h (BLB) | 3                    | 44.3333 | 26.6333            | A                  |                         |
| BGS2-10 h (BLB) | 3                    | 72.6667 | 24.0069            | A                  | 0.1632                  |
| BGS9-10 h (BLB) | 3                    | 65.6667 | 12.0554            | A                  | 0.2767                  |

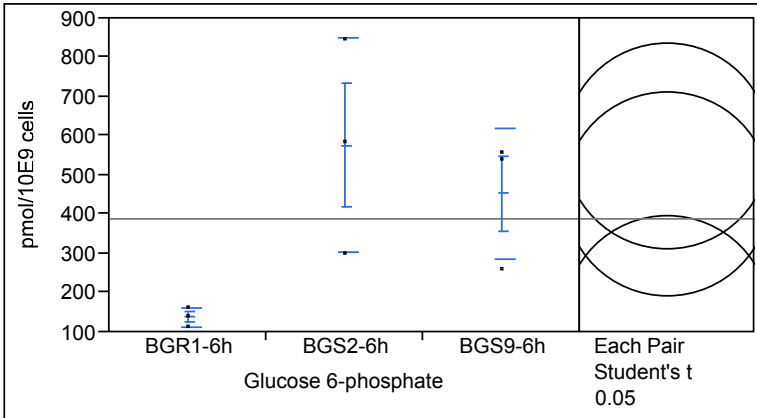

| Strain        | Number of replicates | Mean    | Standard deviation | Connecting Letters | p-value against control |
|---------------|----------------------|---------|--------------------|--------------------|-------------------------|
| BGR1-6 h (LB) | 3                    | 138.000 | 23.000             | B                  |                         |
| BGS2-6 h (LB) | 3                    | 576.333 | 272.581            | A                  | 0.0272                  |
| BGS9-6 h (LB) | 3                    | 454.000 | 166.469            | AB                 | 0.0812                  |

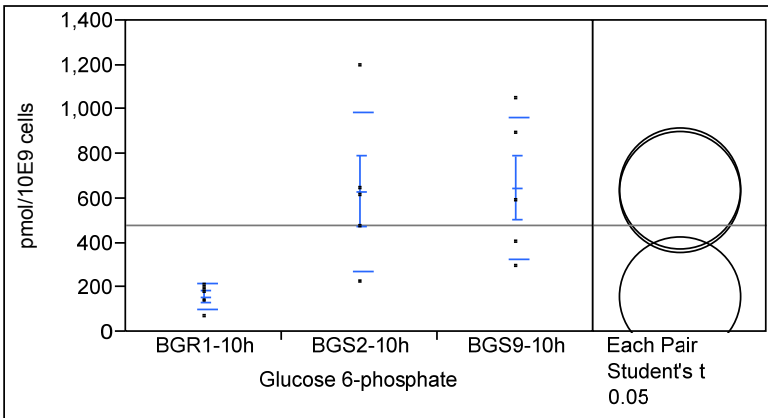

| Strain         | Number of replicates | Mean    | Standard deviation | Connecting Letters | p-value against control |
|----------------|----------------------|---------|--------------------|--------------------|-------------------------|
| BGR1-10 h (LB) | 5                    | 159.400 | 55.662             | B                  |                         |
| BGS2-10 h (LB) | 5                    | 632.800 | 356.830            | A                  | 0.0197                  |
| BGS9-10 h (LB) | 5                    | 646.600 | 319.587            | A                  | 0.0171                  |

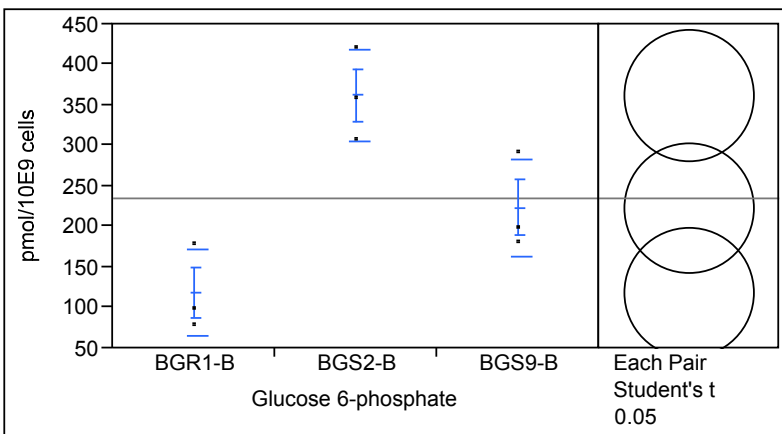

| Strain          | Number of replicates | Mean    | Standard deviation | Connecting Letters | p-value against control |
|-----------------|----------------------|---------|--------------------|--------------------|-------------------------|
| BGR1-10 h (BLB) | 3                    | 119.333 | 53.4821            | B                  |                         |
| BGS2-10 h (BLB) | 3                    | 362.333 | 57.0731            | A                  | 0.0019                  |
| BGS9-10 h (BLB) | 3                    | 224.000 | 59.5735            | B                  | 0.0647                  |

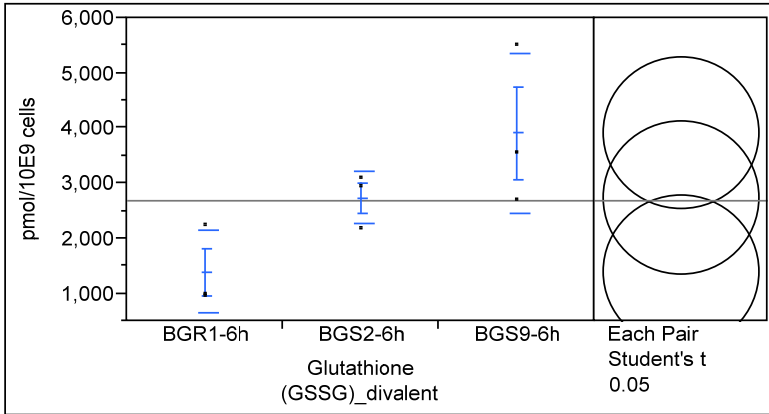

| Strain        | Number of replicates | Mean    | Standard deviation | Connecting Letters | p-value against control |
|---------------|----------------------|---------|--------------------|--------------------|-------------------------|
| BGR1-6 h (LB) | 3                    | 1399.33 | 739.31             | B                  |                         |
| BGS2-6 h (LB) | 3                    | 2741.67 | 479.18             | AB                 | 0.1439                  |
| BGS9-6 h (LB) | 3                    | 3917.67 | 1447.79            | A                  | 0.0198                  |

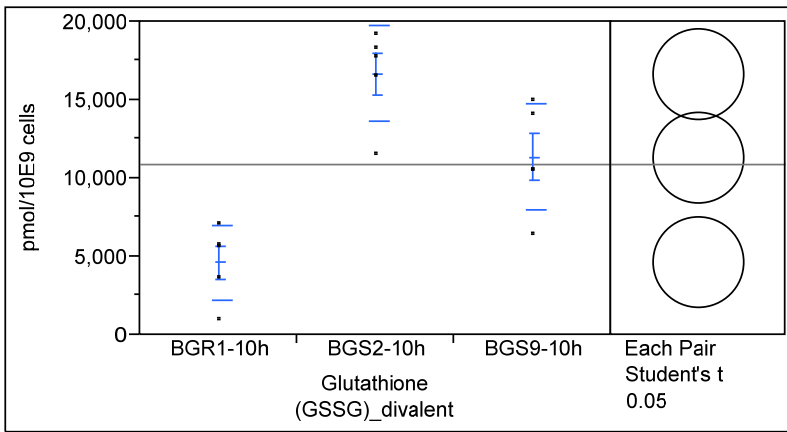

| Strain         | Number of replicates | Mean    | Standard deviation | Connecting Letters | p-value against control |
|----------------|----------------------|---------|--------------------|--------------------|-------------------------|
| BGR1-10 h (LB) | 5                    | 4629.8  | 2379.85            | C                  |                         |
| BGS2-10 h (LB) | 5                    | 16696.2 | 3034.30            | A                  | <.0001                  |
| BGS9-10 h (LB) | 5                    | 11361.2 | 3396.58            | B                  | 0.0037                  |

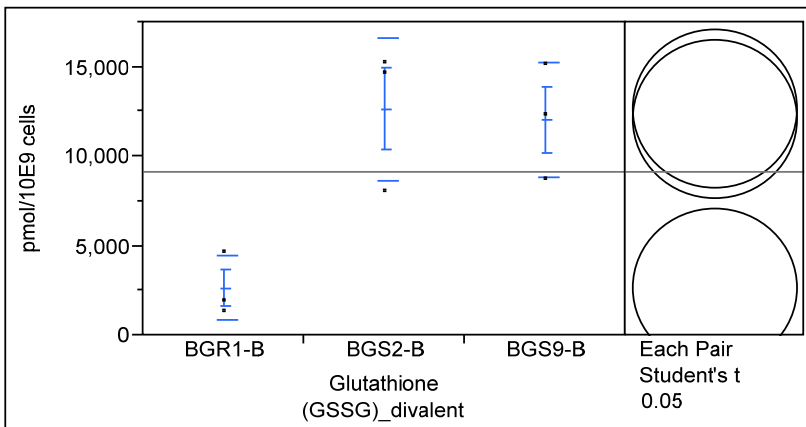

| Strain          | Number of replicates | Mean    | Standard deviation | Connecting Letters | p-value against control |
|-----------------|----------------------|---------|--------------------|--------------------|-------------------------|
| BGR1-10 h (BLB) | 3                    | 2667.7  | 1787.57            | B                  |                         |
| BGS2-10 h (BLB) | 3                    | 12677.7 | 3986.66            | A                  | 0.0078                  |
| BGS9-10 h (BLB) | 3                    | 12091.7 | 3213.69            | A                  | 0.0103                  |

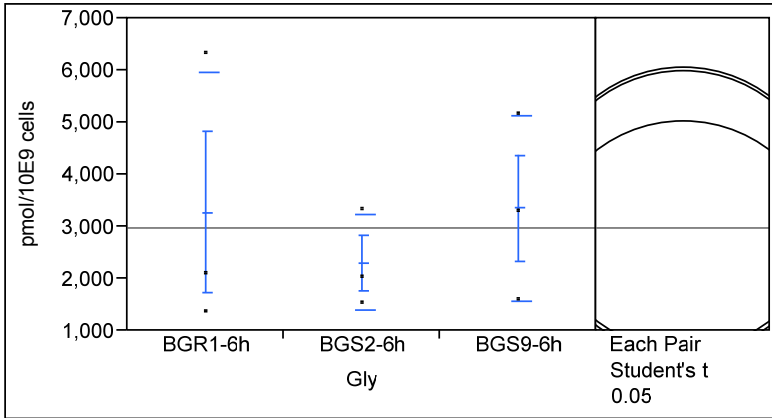

| Strain        | Number of replicates | Mean    | Standard deviation | Connecting Letters | p-value against control |
|---------------|----------------------|---------|--------------------|--------------------|-------------------------|
| BGR1-6 h (LB) | 3                    | 3274.67 | 2677.26            | A                  |                         |
| BGS2-6 h (LB) | 3                    | 2302.33 | 916.64             | A                  | 0.5598                  |
| BGS9-6 h (LB) | 3                    | 3355.00 | 1777.41            | A                  | 0.9610                  |

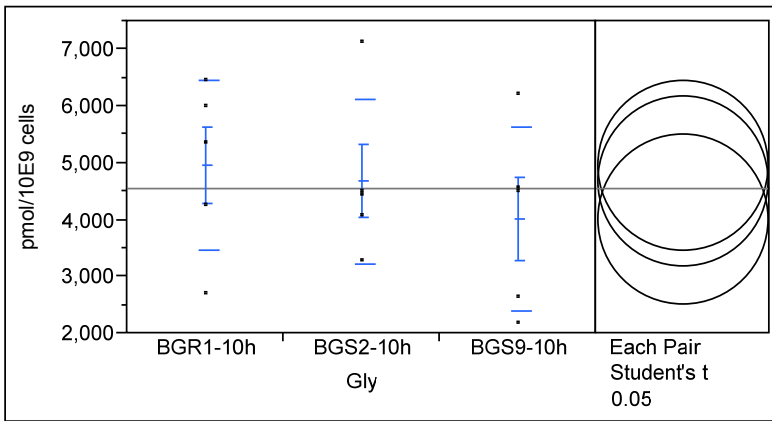

| Strain         | Number of replicates | Mean    | Standard deviation | Connecting Letters | p-value against control |
|----------------|----------------------|---------|--------------------|--------------------|-------------------------|
| BGR1-10 h (LB) | 5                    | 4958.60 | 1503.81            | A                  |                         |
| BGS2-10 h (LB) | 5                    | 4684.40 | 1449.01            | A                  | 0.7814                  |
| BGS9-10 h (LB) | 5                    | 4021.60 | 1624.59            | A                  | 0.3513                  |

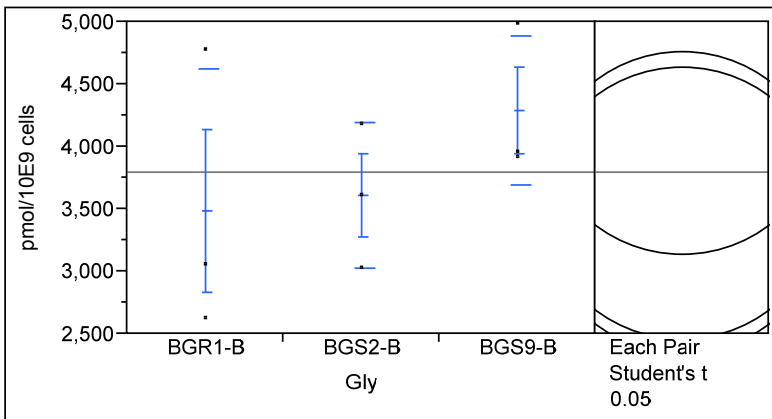

| Strain          | Number of replicates | Mean    | Standard deviation | Connecting Letters | p-value against control |
|-----------------|----------------------|---------|--------------------|--------------------|-------------------------|
| BGR1-10 h (BLB) | 3                    | 3489.00 | 1133.52            | A                  |                         |
| BGS2-10 h (BLB) | 3                    | 3611.33 | 578.01             | A                  | 0.8599                  |
| BGS9-10 h (BLB) | 3                    | 4292.00 | 603.12             | A                  | 0.2719                  |

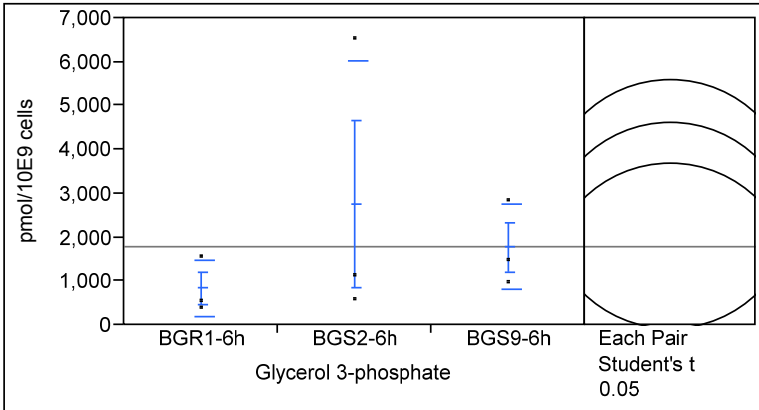

| Strain        | Number of replicates | Mean    | Standard deviation | Connecting Letters | p-value against control |
|---------------|----------------------|---------|--------------------|--------------------|-------------------------|
| BGR1-6 h (LB) | 3                    | 837.00  | 629.75             | A                  |                         |
| BGS2-6 h (LB) | 3                    | 2752.33 | 3293.35            | A                  | 0.2886                  |
| BGS9-6 h (LB) | 3                    | 1775.67 | 969.86             | A                  | 0.5891                  |

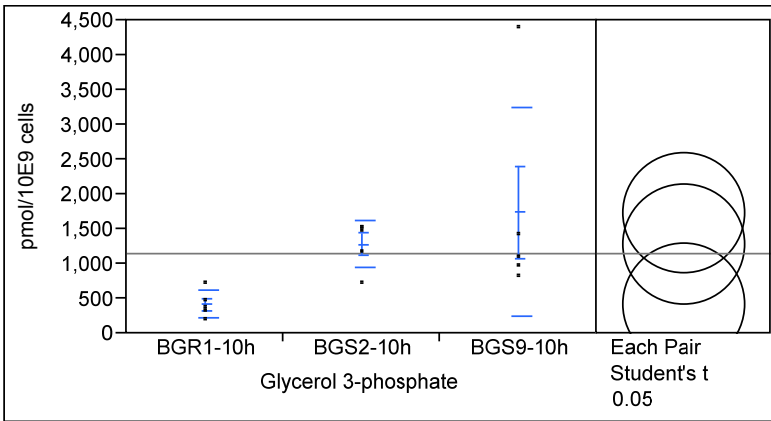

| Strain         | Number of replicates | Mean    | Standard deviation | Connecting Letters | p-value against control |
|----------------|----------------------|---------|--------------------|--------------------|-------------------------|
| BGR1-10 h (LB) | 5                    | 418.20  | 194.44             | B                  |                         |
| BGS2-10 h (LB) | 5                    | 1286.40 | 340.59             | AB                 | 0.1510                  |
| BGS9-10 h (LB) | 5                    | 1740.20 | 1499.74            | A                  | 0.0377                  |

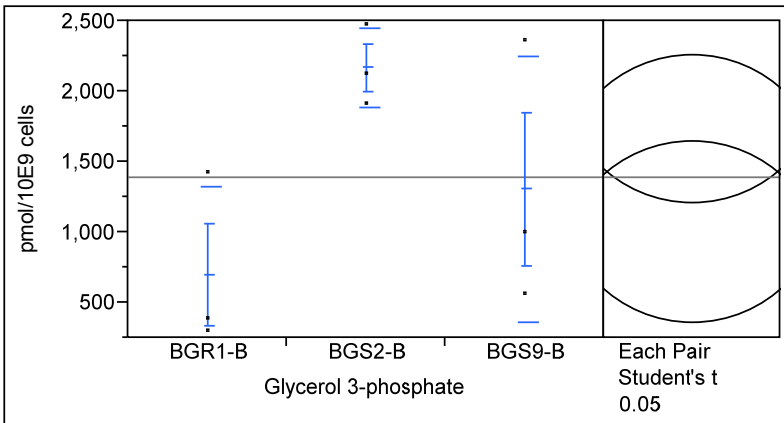

| Strain          | Number of replicates | Mean    | Standard deviation | Connecting Letters | p-value against control |
|-----------------|----------------------|---------|--------------------|--------------------|-------------------------|
| BGR1-10 h (BLB) | 3                    | 698.33  | 625.665            | B                  |                         |
| BGS2-10 h (BLB) | 3                    | 2169.00 | 285.790            | A                  | 0.0368                  |
| BGS9-10 h (BLB) | 3                    | 1309.00 | 941.806            | AB                 | 0.3092                  |

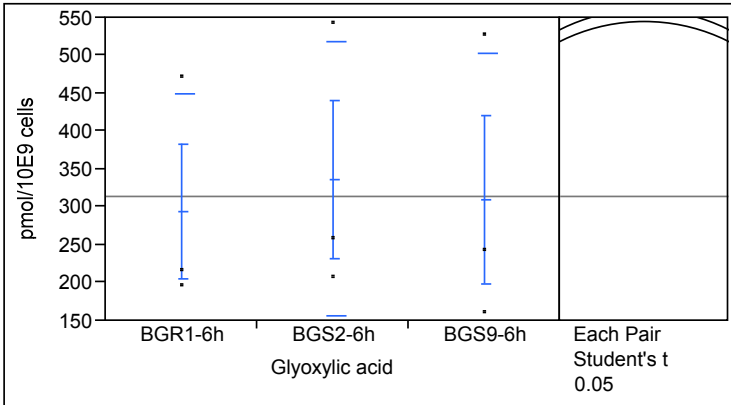

| Strain        | Number of replicates | Mean    | Standard deviation | Connecting Letters | p-value against control |
|---------------|----------------------|---------|--------------------|--------------------|-------------------------|
| BGR1-6 h (LB) | 3                    | 295.000 | 154.477            | A                  |                         |
| BGS2-6 h (LB) | 3                    | 337.333 | 180.857            | A                  | 0.7791                  |
| BGS9-6 h (LB) | 3                    | 310.667 | 192.630            | A                  | 0.9171                  |

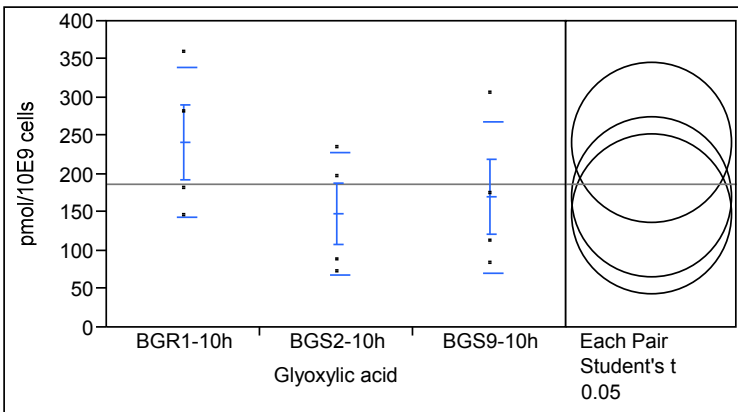

| Strain         | Number of replicates | Mean    | Standard deviation | Connecting Letters | p-value against control |
|----------------|----------------------|---------|--------------------|--------------------|-------------------------|
| BGR1-10 h (LB) | 4                    | 242.750 | 97.5957            | A                  |                         |
| BGS2-10 h (LB) | 4                    | 149.000 | 80.3036            | A                  | 0.1858                  |
| BGS9-10 h (LB) | 4                    | 170.500 | 98.5985            | A                  | 0.2982                  |

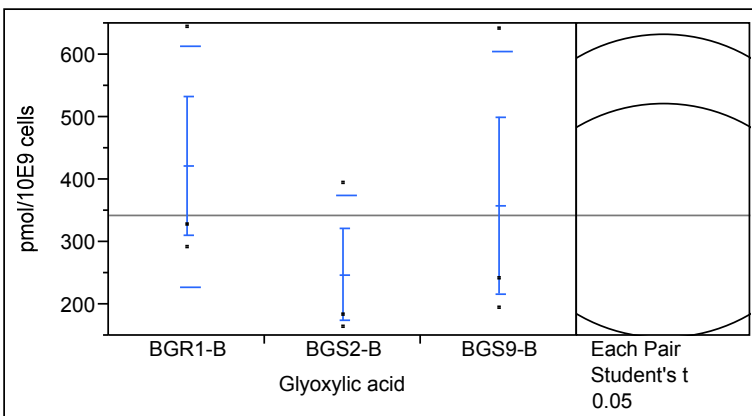

| Strain          | Number of replicates | Mean    | Standard deviation | Connecting Letters | p-value against control |
|-----------------|----------------------|---------|--------------------|--------------------|-------------------------|
| BGR1-10 h (BLB) | 3                    | 421.667 | 193.340            | A                  |                         |
| BGS2-10 h (BLB) | 3                    | 247.667 | 127.084            | A                  | 0.3154                  |
| BGS9-10 h (BLB) | 3                    | 359.333 | 245.060            | A                  | 0.7084                  |

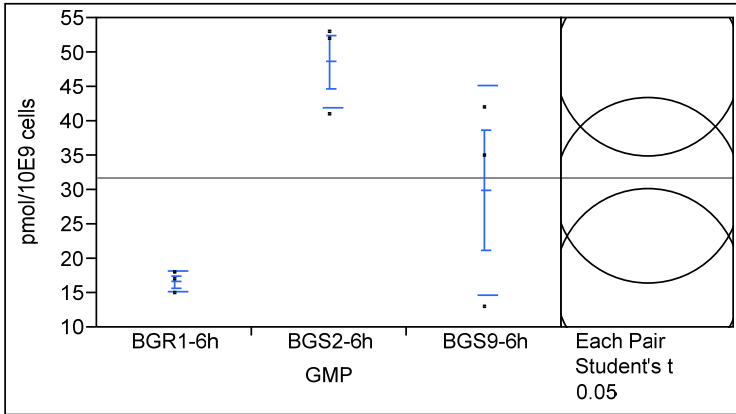

| Strain        | Number of replicates | Mean    | Standard deviation | Connecting Letters | p-value against control |
|---------------|----------------------|---------|--------------------|--------------------|-------------------------|
| BGR1-6 h (LB) | 3                    | 16.6667 | 1.5275             | B                  |                         |
| BGS2-6 h (LB) | 3                    | 48.6667 | 6.6583             | A                  | 0.0064                  |
| BGS9-6 h (LB) | 3                    | 30.0000 | 15.1327            | AB                 | 0.1394                  |

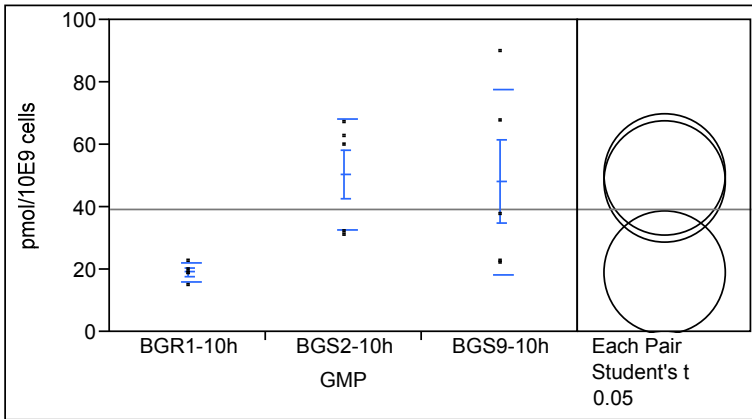

| Strain         | Number of replicates | Mean    | Standard deviation | Connecting Letters | p-value against control |
|----------------|----------------------|---------|--------------------|--------------------|-------------------------|
| BGR1-10 h (LB) | 5                    | 19.2000 | 2.8636             | B                  |                         |
| BGS2-10 h (LB) | 5                    | 50.6000 | 17.6153            | A                  | 0.0294                  |
| BGS9-10 h (LB) | 5                    | 48.2000 | 29.8530            | A                  | 0.0414                  |

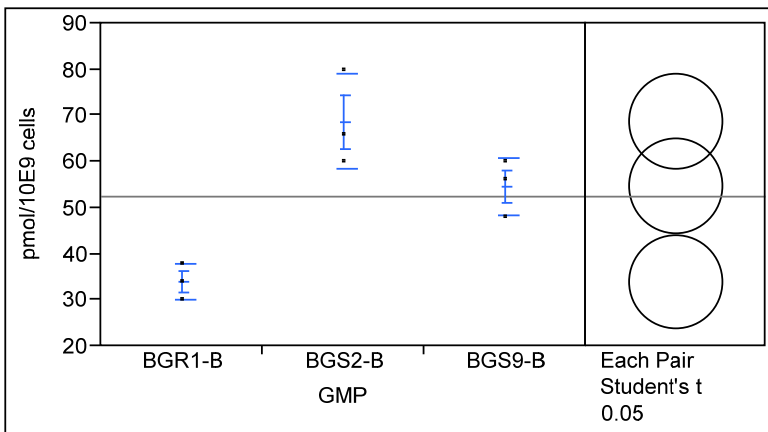

| Strain          | Number of replicates | Mean    | Standard deviation | Connecting Letters | p-value against control |
|-----------------|----------------------|---------|--------------------|--------------------|-------------------------|
| BGR1-10 h (BLB) | 3                    | 34.0000 | 4.0000             | B                  |                         |
| BGS2-10 h (BLB) | 3                    | 68.6667 | 10.2632            | A                  | 0.0011                  |
| BGS9-10 h (BLB) | 3                    | 54.6667 | 6.1101             | A                  | 0.0131                  |



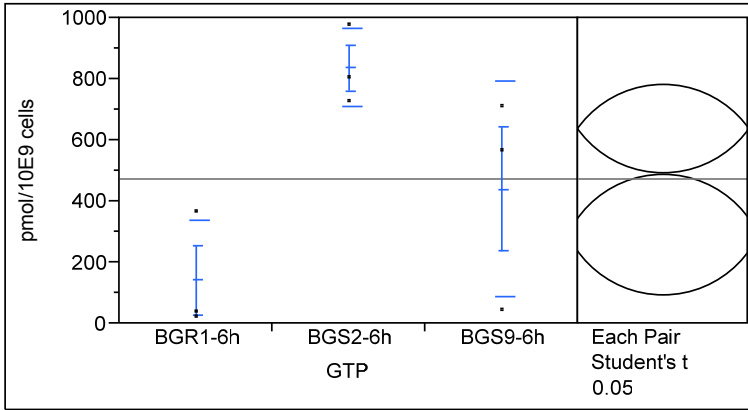

| Strain        | Number of replicates | Mean    | Standard deviation | Connecting Letters | p-value against control |
|---------------|----------------------|---------|--------------------|--------------------|-------------------------|
| BGR1-6 h (LB) | 3                    | 143.333 | 195.577            | B                  |                         |
| BGS2-6 h (LB) | 3                    | 837.333 | 128.974            | A                  | 0.0131                  |
| BGS9-6 h (LB) | 3                    | 440.333 | 351.968            | AB                 | 0.1868                  |

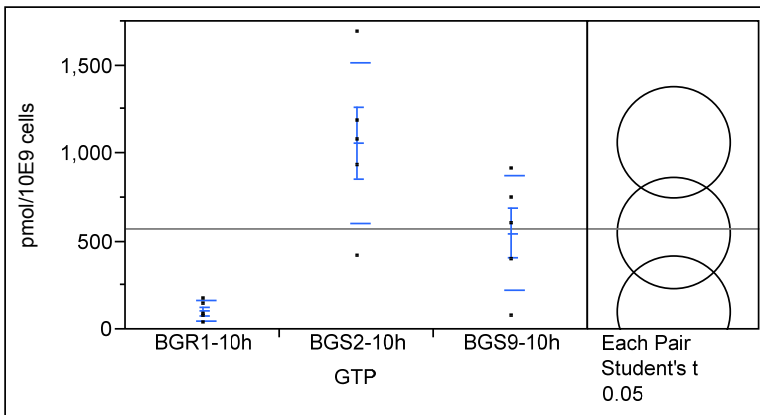

| Strain         | Number of replicates | Mean    | Standard deviation | Connecting Letters | p-value against control |
|----------------|----------------------|---------|--------------------|--------------------|-------------------------|
| BGR1-10 h (LB) | 5                    | 105.40  | 55.279             | B                  |                         |
| BGS2-10 h (LB) | 5                    | 1062.00 | 459.416            | A                  | 0.0006                  |
| BGS9-10 h (LB) | 5                    | 549.20  | 322.927            | B                  | 0.0523                  |

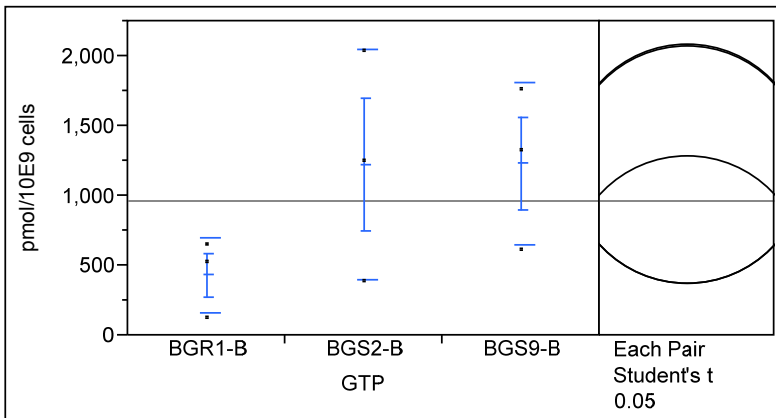

| Strain          | Number of replicates | Mean    | Standard deviation | Connecting Letters | p-value against control |
|-----------------|----------------------|---------|--------------------|--------------------|-------------------------|
| BGR1-10 h (BLB) | 3                    | 433.67  | 272.225            | A                  |                         |
| BGS2-10 h (BLB) | 3                    | 1226.33 | 825.373            | A                  | 0.1590                  |
| BGS9-10 h (BLB) | 3                    | 1232.67 | 581.644            | A                  | 0.1562                  |

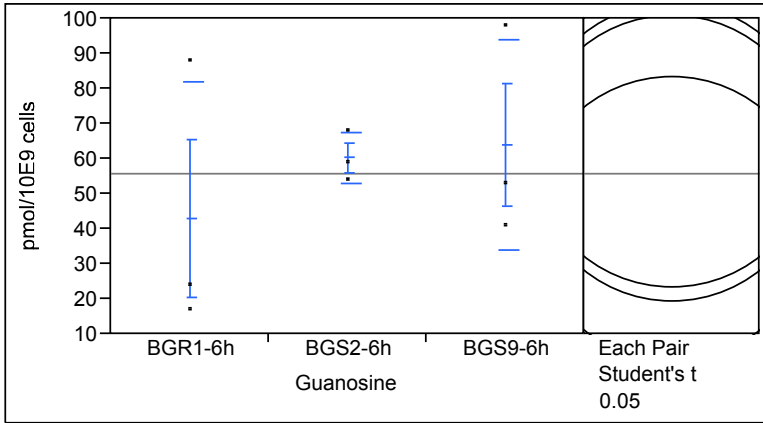

| Strain        | Number of replicates | Mean    | Standard deviation | Connecting Letters | $\rho$ -value against control |
|---------------|----------------------|---------|--------------------|--------------------|-------------------------------|
| BGR1-6 h (LB) | 3                    | 43.0000 | 39.1280            | A                  |                               |
| BGS2-6 h (LB) | 3                    | 60.3333 | 7.0946             | A                  | 0.4885                        |
| BGS9-6 h (LB) | 3                    | 64.0000 | 30.0500            | A                  | 0.4059                        |

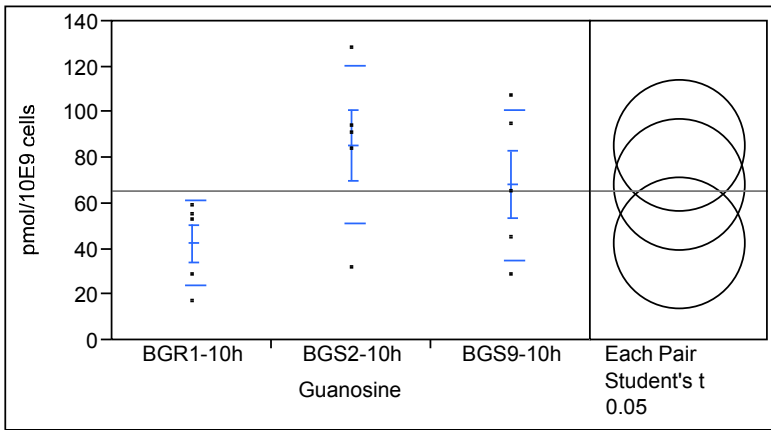

| Strain         | Number of replicates | Mean    | Standard deviation | Connecting Letters | $\rho$ -value against control |
|----------------|----------------------|---------|--------------------|--------------------|-------------------------------|
| BGR1-10 h (LB) | 5                    | 42.6000 | 18.5149            | B                  |                               |
| BGS2-10 h (LB) | 5                    | 85.8000 | 34.5427            | A                  | 0.0392                        |
| BGS9-10 h (LB) | 5                    | 68.2000 | 32.8207            | AB                 | 0.1953                        |

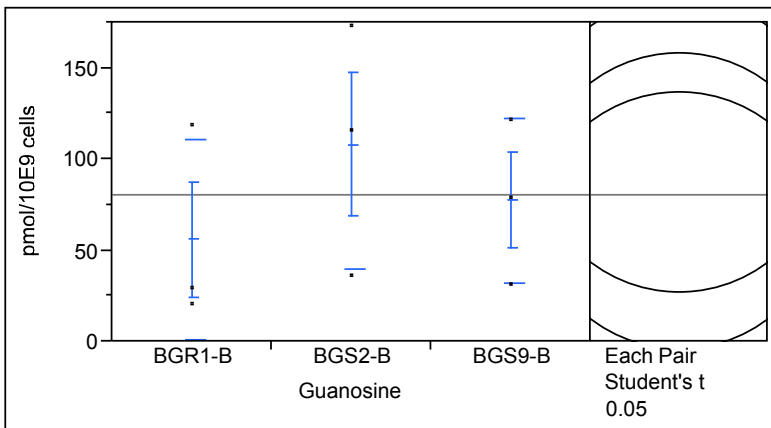

| Strain          | Number of replicates | Mean    | Standard deviation | Connecting Letters | $\rho$ -value against control |
|-----------------|----------------------|---------|--------------------|--------------------|-------------------------------|
| BGR1-10 h (BLB) | 3                    | 56.000  | 54.7449            | A                  |                               |
| BGS2-10 h (BLB) | 3                    | 108.333 | 68.8210            | A                  | 0.3051                        |
| BGS9-10 h (BLB) | 3                    | 77.333  | 45.5229            | A                  | 0.6637                        |

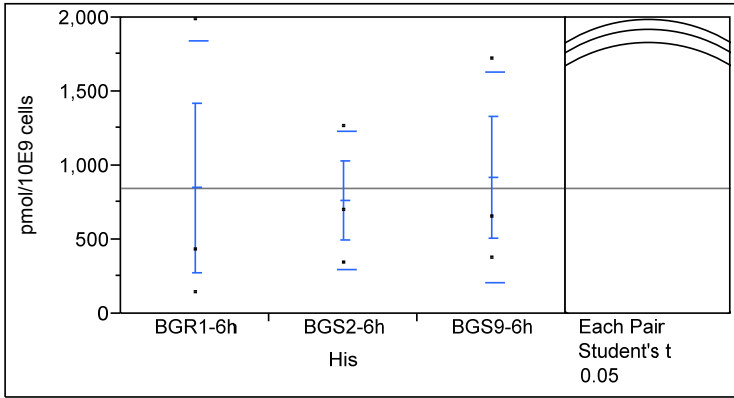

| Strain        | Number of replicates | Mean    | Standard deviation | Connecting Letters | p-value against control |
|---------------|----------------------|---------|--------------------|--------------------|-------------------------|
| BGR1-6 h (LB) | 3                    | 853.333 | 990.941            | A                  |                         |
| BGS2-6 h (LB) | 3                    | 769.333 | 464.511            | A                  | 0.8958                  |
| BGS9-6 h (LB) | 3                    | 919.667 | 709.303            | A                  | 0.9176                  |

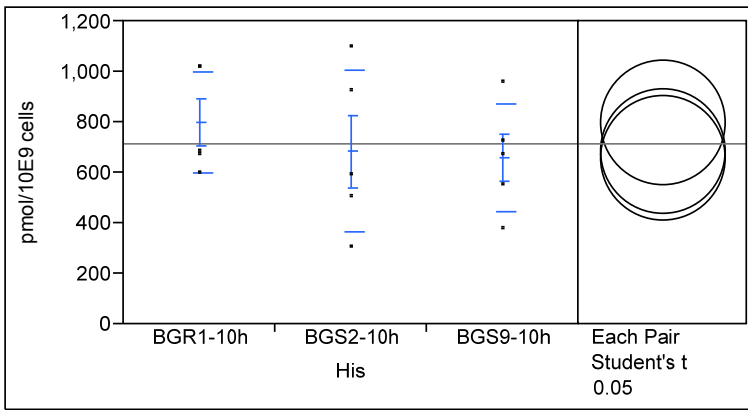

| Strain         | Number of replicates | Mean    | Standard deviation | Connecting Letters | p-value against control |
|----------------|----------------------|---------|--------------------|--------------------|-------------------------|
| BGR1-10 h (LB) | 5                    | 800.000 | 202.561            | A                  |                         |
| BGS2-10 h (LB) | 5                    | 686.400 | 320.997            | A                  | 0.4888                  |
| BGS9-10 h (LB) | 5                    | 659.400 | 213.807            | A                  | 0.3941                  |

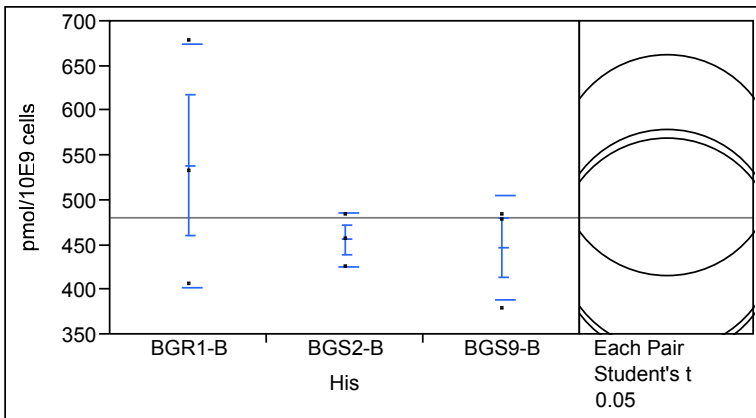

| Strain          | Number of replicates | Mean    | Standard deviation | Connecting Letters | p-value against control |
|-----------------|----------------------|---------|--------------------|--------------------|-------------------------|
| BGR1-10 h (BLB) | 3                    | 539.000 | 136.099            | A                  |                         |
| BGS2-10 h (BLB) | 3                    | 456.000 | 29.513             | A                  | 0.2879                  |
| BGS9-10 h (BLB) | 3                    | 447.333 | 58.389             | A                  | 0.2453                  |

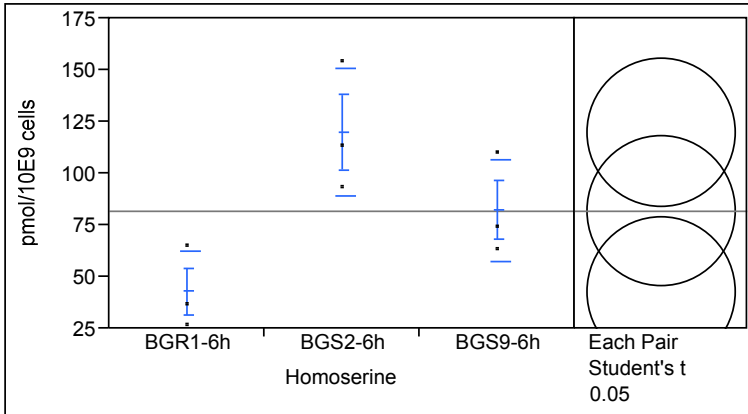

| Strain        | Number of replicates | Mean    | Standard deviation | Connecting Letters | p-value against control |
|---------------|----------------------|---------|--------------------|--------------------|-------------------------|
| BGR1-6 h (LB) | 3                    | 43.000  | 19.6977            | B                  |                         |
| BGS2-6 h (LB) | 3                    | 120.000 | 31.0966            | A                  | 0.0102                  |
| BGS9-6 h (LB) | 3                    | 82.333  | 24.5832            | AB                 | 0.1084                  |

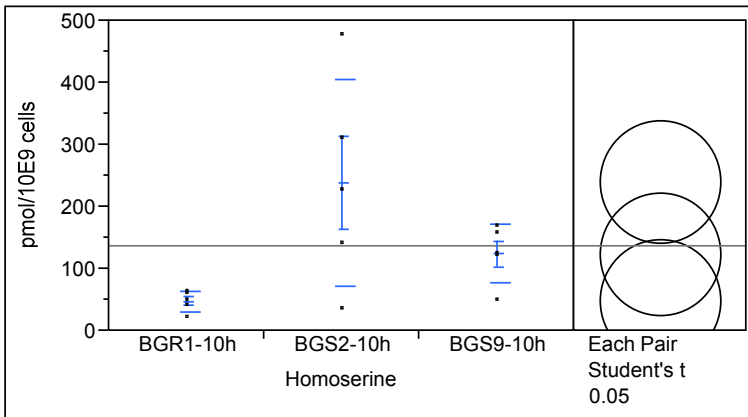

| Strain         | Number of replicates | Mean    | Standard deviation | Connecting Letters | p-value against control |
|----------------|----------------------|---------|--------------------|--------------------|-------------------------|
| BGR1-10 h (LB) | 5                    | 48.400  | 16.742             | B                  |                         |
| BGS2-10 h (LB) | 5                    | 239.200 | 167.595            | A                  | 0.0113                  |
| BGS9-10 h (LB) | 5                    | 124.600 | 47.168             | AB                 | 0.2559                  |

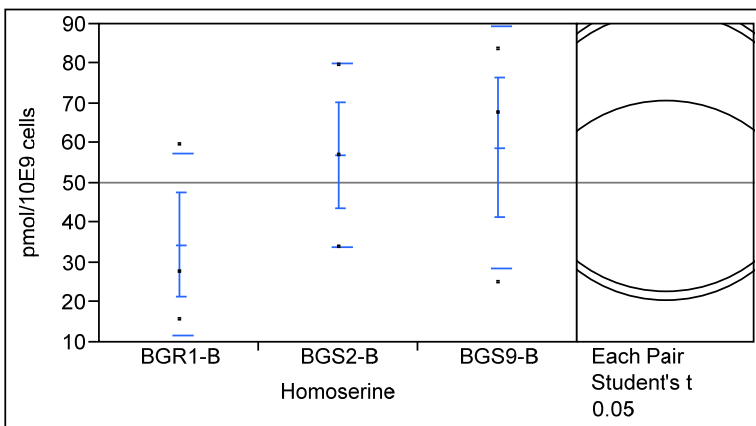

| Strain          | Number of replicates | Mean    | Standard deviation | Connecting Letters | p-value against control |
|-----------------|----------------------|---------|--------------------|--------------------|-------------------------|
| BGR1-10 h (BLB) | 3                    | 34.6667 | 22.7450            | A                  |                         |
| BGS2-10 h (BLB) | 3                    | 57.0000 | 23.0000            | A                  | 0.3277                  |
| BGS9-10 h (BLB) | 3                    | 59.0000 | 30.5123            | A                  | 0.2898                  |

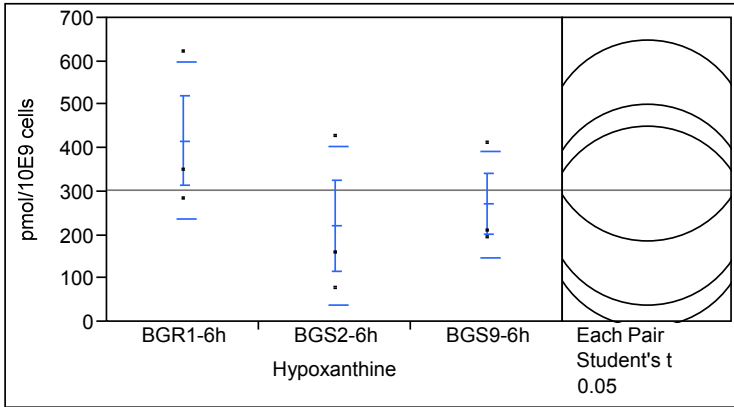

| Strain        | Number of replicates | Mean    | Standard deviation | Connecting Letters | p-value against control |
|---------------|----------------------|---------|--------------------|--------------------|-------------------------|
| BGR1-6 h (LB) | 3                    | 418.000 | 179.911            | A                  |                         |
| BGS2-6 h (LB) | 3                    | 221.333 | 182.659            | A                  | 0.1922                  |
| BGS9-6 h (LB) | 3                    | 271.333 | 122.083            | A                  | 0.3153                  |

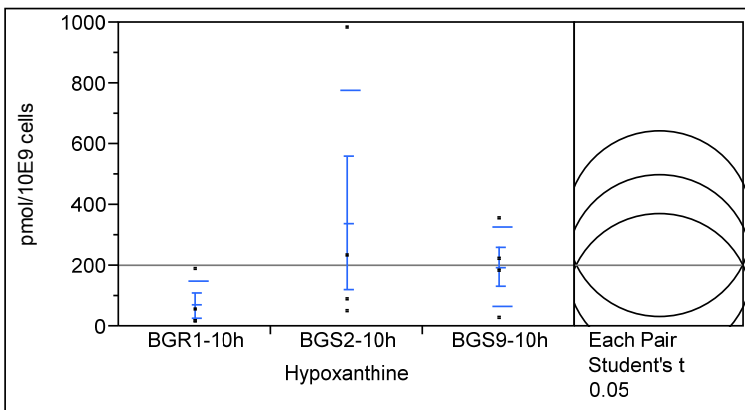

| Strain         | Number of replicates | Mean    | Standard deviation | Connecting Letters | p-value against control |
|----------------|----------------------|---------|--------------------|--------------------|-------------------------|
| BGR1-10 h (LB) | 4                    | 69.750  | 82.855             | A                  |                         |
| BGS2-10 h (LB) | 4                    | 339.750 | 437.879            | A                  | 0.1887                  |
| BGS9-10 h (LB) | 4                    | 197.000 | 132.788            | A                  | 0.5195                  |

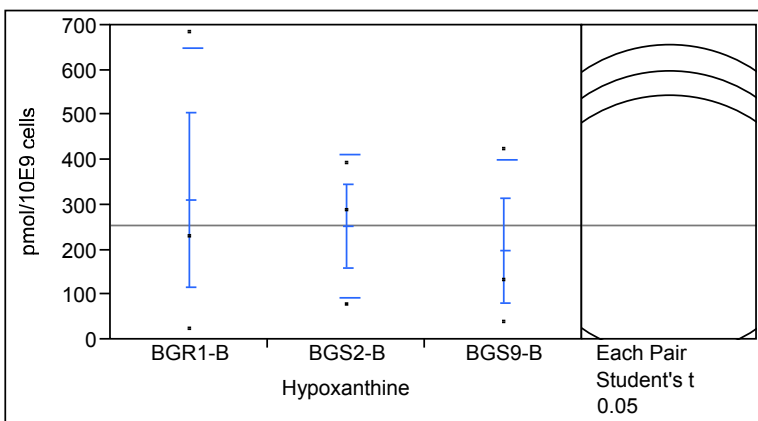

| Strain          | Number of replicates | Mean    | Standard deviation | Connecting Letters | p-value against control |
|-----------------|----------------------|---------|--------------------|--------------------|-------------------------|
| BGR1-10 h (BLB) | 3                    | 311.667 | 338.349            | A                  |                         |
| BGS2-10 h (BLB) | 3                    | 252.667 | 158.973            | A                  | 0.7782                  |
| BGS9-10 h (BLB) | 3                    | 199.000 | 201.522            | A                  | 0.5940                  |

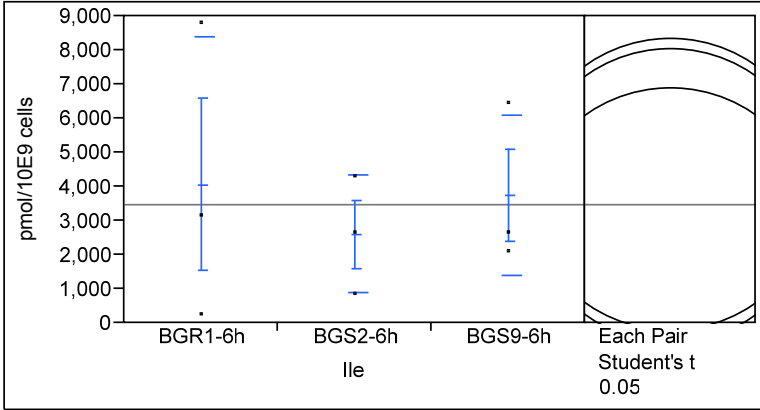

| Strain        | Number of replicates | Mean    | Standard deviation | Connecting Letters | p-value against control |
|---------------|----------------------|---------|--------------------|--------------------|-------------------------|
| BGR1-6 h (LB) | 3                    | 4070.33 | 4353.38            | A                  |                         |
| BGS2-6 h (LB) | 3                    | 2607.67 | 1724.34            | A                  | 0.5759                  |
| BGS9-6 h (LB) | 3                    | 3753.00 | 2369.98            | A                  | 0.9021                  |

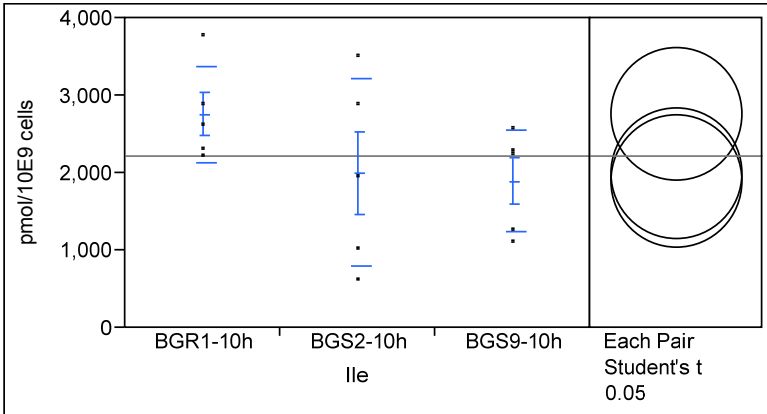

| Strain         | Number of replicates | Mean    | Standard deviation | Connecting Letters | p-value against control |
|----------------|----------------------|---------|--------------------|--------------------|-------------------------|
| BGR1-10 h (LB) | 5                    | 2765.20 | 622.86             | A                  |                         |
| BGS2-10 h (LB) | 5                    | 2002.00 | 1211.71            | A                  | 0.1928                  |
| BGS9-10 h (LB) | 5                    | 1896.80 | 662.13             | A                  | 0.1424                  |

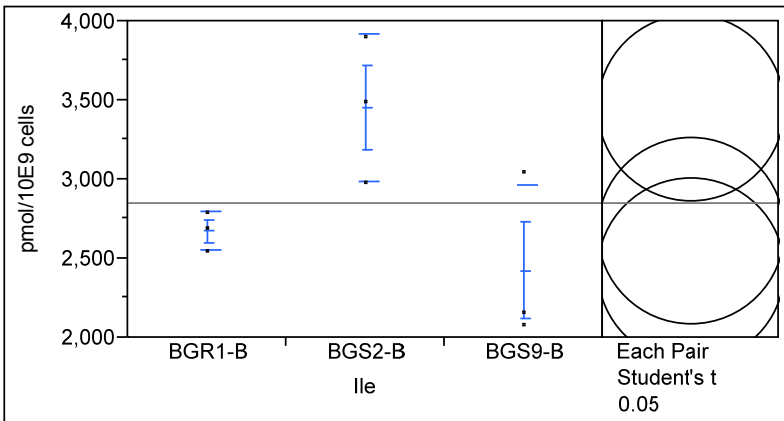

| Strain          | Number of replicates | Mean    | Standard deviation | Connecting Letters | p-value against control |
|-----------------|----------------------|---------|--------------------|--------------------|-------------------------|
| BGR1-10 h (BLB) | 3                    | 2675.67 | 124.536            | AB                 |                         |
| BGS2-10 h (BLB) | 3                    | 3453.67 | 466.241            | A                  | 0.0620                  |
| BGS9-10 h (BLB) | 3                    | 2427.33 | 535.698            | B                  | 0.4925                  |

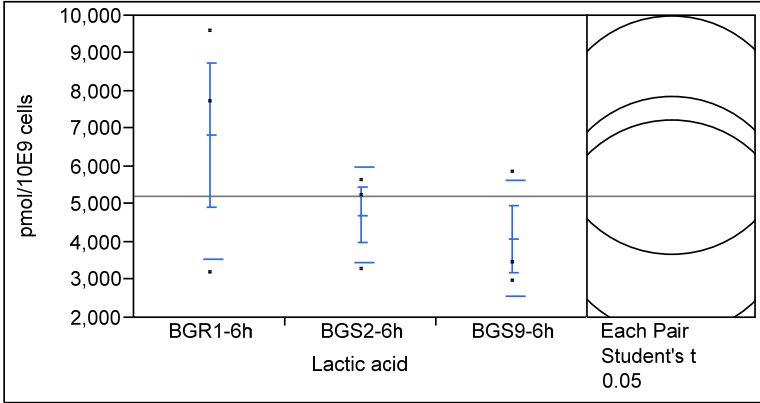

| Strain        | Number of replicates | Mean    | Standard deviation | Connecting Letters | p-value against control |
|---------------|----------------------|---------|--------------------|--------------------|-------------------------|
| BGR1-6 h (LB) | 3                    | 6844.33 | 3297.36            | A                  |                         |
| BGS2-6 h (LB) | 3                    | 4717.67 | 1270.30            | A                  | 0.2859                  |
| BGS9-6 h (LB) | 3                    | 4105.67 | 1533.08            | A                  | 0.1822                  |

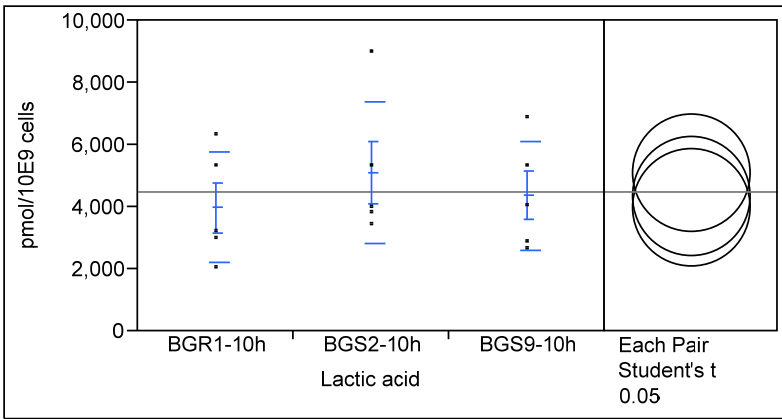

| Strain         | Number of replicates | Mean    | Standard deviation | Connecting Letters | p-value against control |
|----------------|----------------------|---------|--------------------|--------------------|-------------------------|
| BGR1-10 h (LB) | 5                    | 3986.20 | 1775.18            | A                  |                         |
| BGS2-10 h (LB) | 5                    | 5116.20 | 2280.02            | A                  | 0.3782                  |
| BGS9-10 h (LB) | 5                    | 4370.00 | 1756.97            | A                  | 0.7613                  |

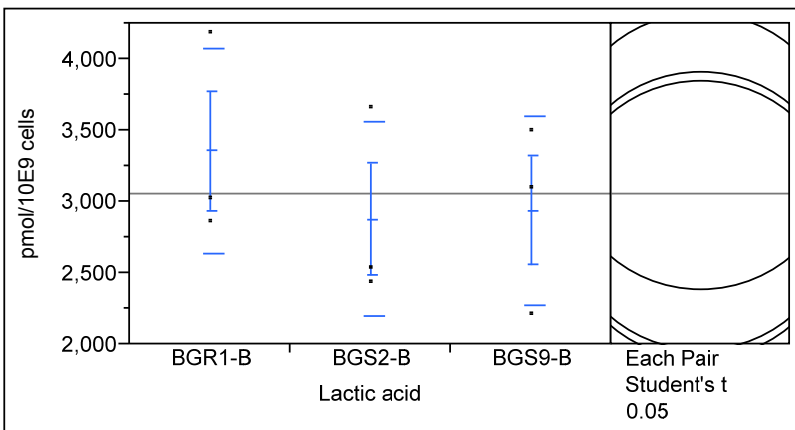

| Strain          | Number of replicates | Mean    | Standard deviation | Connecting Letters | p-value against control |
|-----------------|----------------------|---------|--------------------|--------------------|-------------------------|
| BGR1-10 h (BLB) | 3                    | 3359.33 | 720.595            | A                  |                         |
| BGS2-10 h (BLB) | 3                    | 2876.67 | 680.013            | A                  | 0.4230                  |
| BGS9-10 h (BLB) | 3                    | 2938.00 | 661.127            | A                  | 0.4814                  |

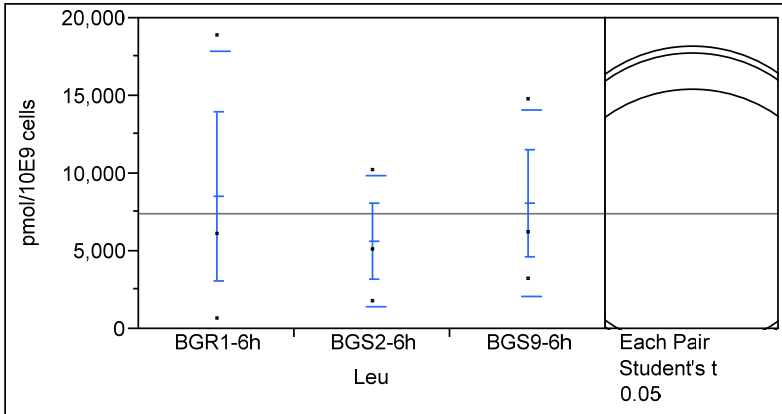

| Strain        | Number of replicates | Mean    | Standard deviation | Connecting Letters | p-value against control |
|---------------|----------------------|---------|--------------------|--------------------|-------------------------|
| BGR1-6 h (LB) | 3                    | 8550.67 | 9384.00            | A                  |                         |
| BGS2-6 h (LB) | 3                    | 5674.00 | 4265.59            | A                  | 0.6269                  |
| BGS9-6 h (LB) | 3                    | 8076.00 | 5982.08            | A                  | 0.9354                  |

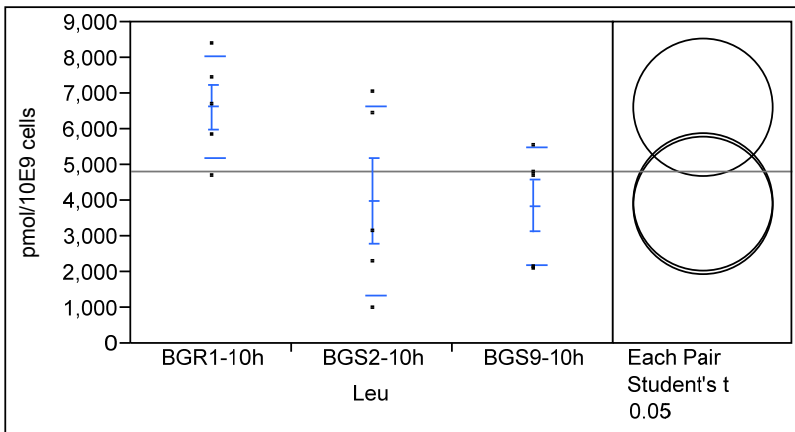

| Strain         | Number of replicates | Mean    | Standard deviation | Connecting Letters | p-value against control |
|----------------|----------------------|---------|--------------------|--------------------|-------------------------|
| BGR1-10 h (LB) | 5                    | 6628.20 | 1426.82            | A                  |                         |
| BGS2-10 h (LB) | 5                    | 3993.80 | 2652.64            | AB                 | 0.0569                  |
| BGS9-10 h (LB) | 5                    | 3854.40 | 1630.90            | B                  | 0.0466                  |

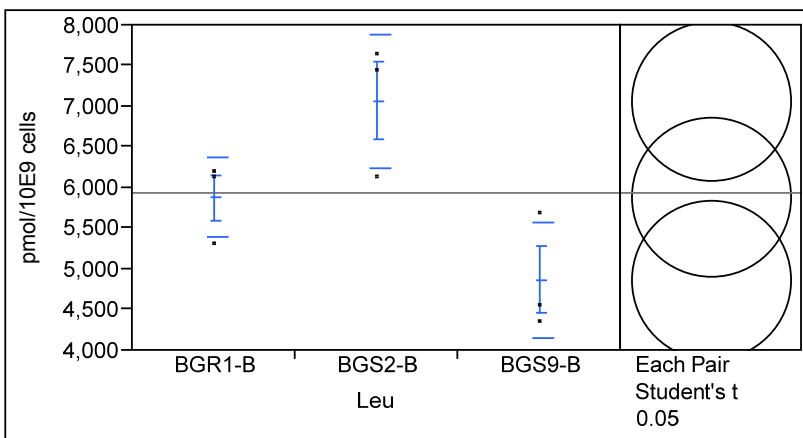

| Strain          | Number of replicates | Mean    | Standard deviation | Connecting Letters | p-value against control |
|-----------------|----------------------|---------|--------------------|--------------------|-------------------------|
| BGR1-10 h (BLB) | 3                    | 5881.00 | 489.763            | AB                 |                         |
| BGS2-10 h (BLB) | 3                    | 7072.67 | 823.151            | A                  | 0.0788                  |
| BGS9-10 h (BLB) | 3                    | 4871.33 | 715.076            | B                  | 0.1233                  |



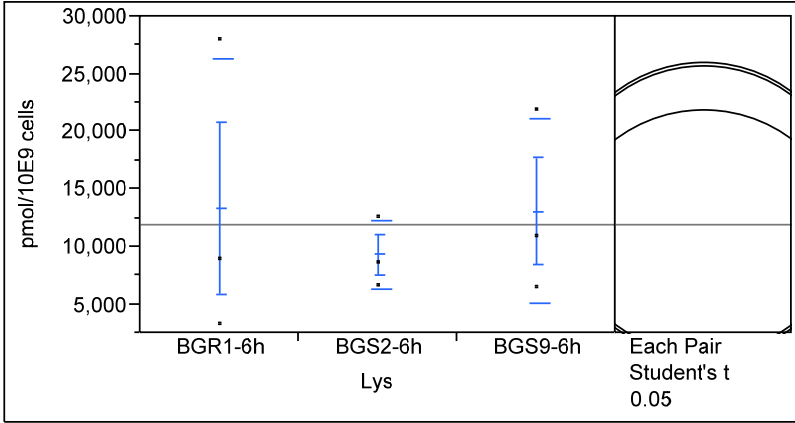

| Strain        | Number of replicates | Mean    | Standard deviation | Connecting Letters | p-value against control |
|---------------|----------------------|---------|--------------------|--------------------|-------------------------|
| BGR1-6 h (LB) | 3                    | 13388.3 | 12930.4            | A                  |                         |
| BGS2-6 h (LB) | 3                    | 9316.7  | 3021.8             | A                  | 0.5977                  |
| BGS9-6 h (LB) | 3                    | 13079.7 | 8006.5             | A                  | 0.9677                  |

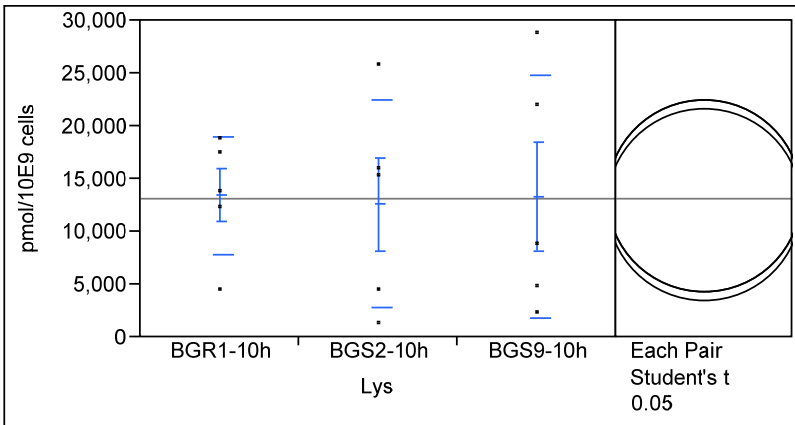

| Strain         | Number of replicates | Mean    | Standard deviation | Connecting Letters | p-value against control |
|----------------|----------------------|---------|--------------------|--------------------|-------------------------|
| BGR1-10 h (LB) | 5                    | 13452.4 | 5626.7             | A                  |                         |
| BGS2-10 h (LB) | 5                    | 12605.6 | 9853.0             | A                  | 0.8882                  |
| BGS9-10 h (LB) | 5                    | 13391.4 | 11499.8            | A                  | 0.9919                  |

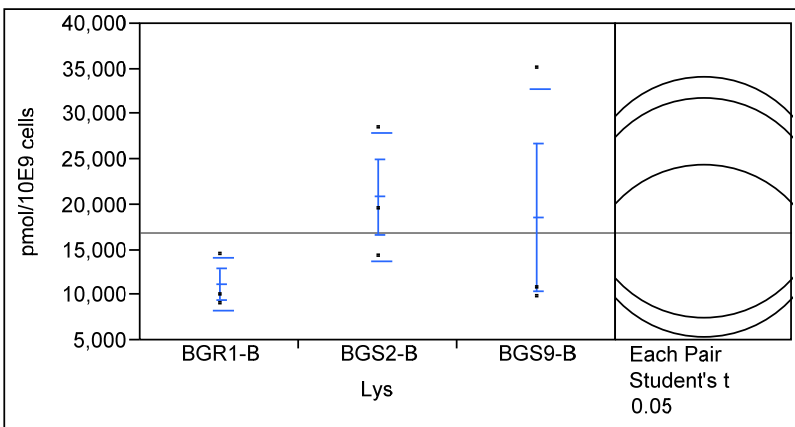

| Strain          | Number of replicates | Mean    | Standard deviation | Connecting Letters | p-value against control |
|-----------------|----------------------|---------|--------------------|--------------------|-------------------------|
| BGR1-10 h (BLB) | 3                    | 11220.3 | 2878.7             | A                  |                         |
| BGS2-10 h (BLB) | 3                    | 20854.3 | 7152.4             | A                  | 0.2549                  |
| BGS9-10 h (BLB) | 3                    | 18600.3 | 14289.0            | A                  | 0.3722                  |

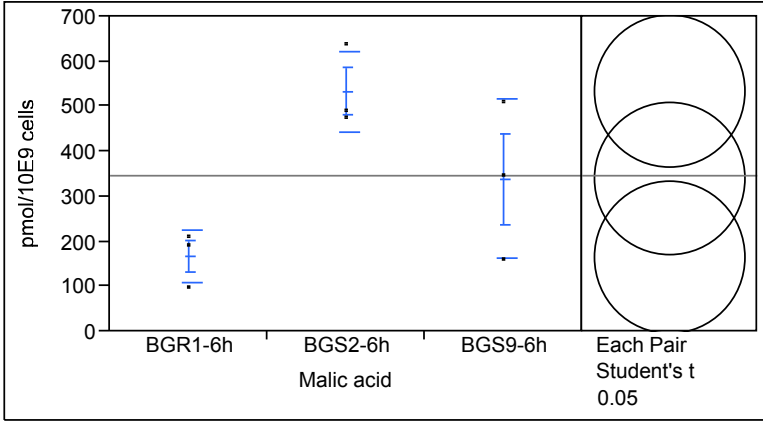

| Strain        | Number of replicates | Mean    | Standard deviation | Connecting Letters | p-value against control |
|---------------|----------------------|---------|--------------------|--------------------|-------------------------|
| BGR1-6 h (LB) | 3                    | 166.333 | 59.164             | B                  |                         |
| BGS2-6 h (LB) | 3                    | 533.667 | 89.846             | A                  | 0.0092                  |
| BGS9-6 h (LB) | 3                    | 339.333 | 176.160            | AB                 | 0.1257                  |

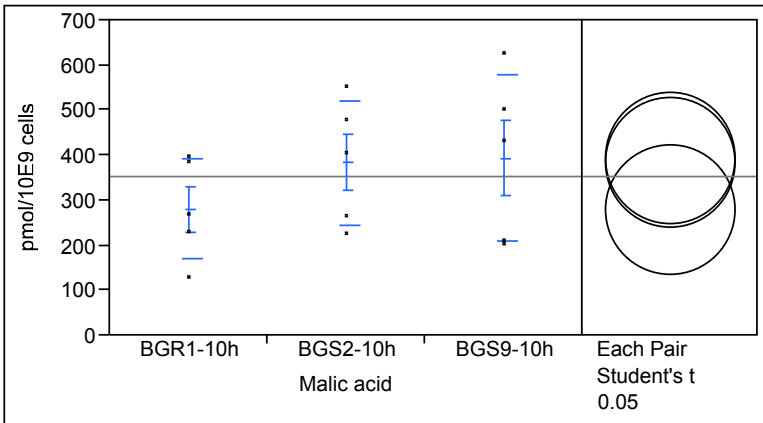

| Strain         | Number of replicates | Mean    | Standard deviation | Connecting Letters | p-value against control |
|----------------|----------------------|---------|--------------------|--------------------|-------------------------|
| BGR1-10 h (LB) | 5                    | 281.000 | 111.741            | A                  |                         |
| BGS2-10 h (LB) | 5                    | 384.800 | 138.004            | A                  | 0.2895                  |
| BGS9-10 h (LB) | 5                    | 394.600 | 185.147            | A                  | 0.2486                  |

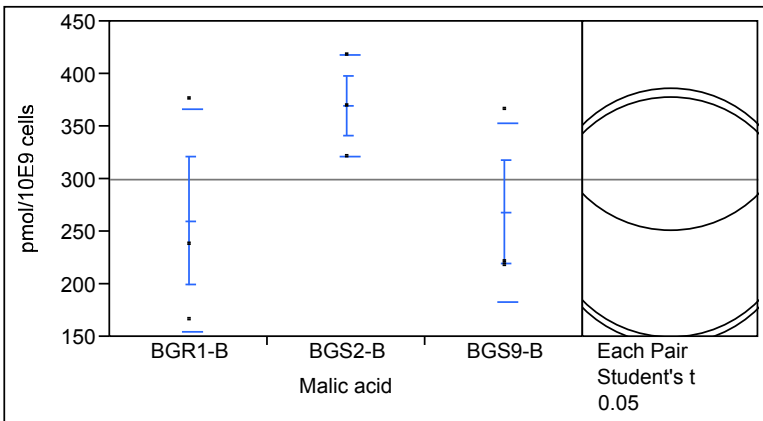

| Strain          | Number of replicates | Mean    | Standard deviation | Connecting Letters | p-value against control |
|-----------------|----------------------|---------|--------------------|--------------------|-------------------------|
| BGR1-10 h (BLB) | 3                    | 260.667 | 106.171            | A                  |                         |
| BGS2-10 h (BLB) | 3                    | 370.000 | 49.000             | A                  | 0.1600                  |
| BGS9-10 h (BLB) | 3                    | 268.667 | 85.172             | A                  | 0.9104                  |

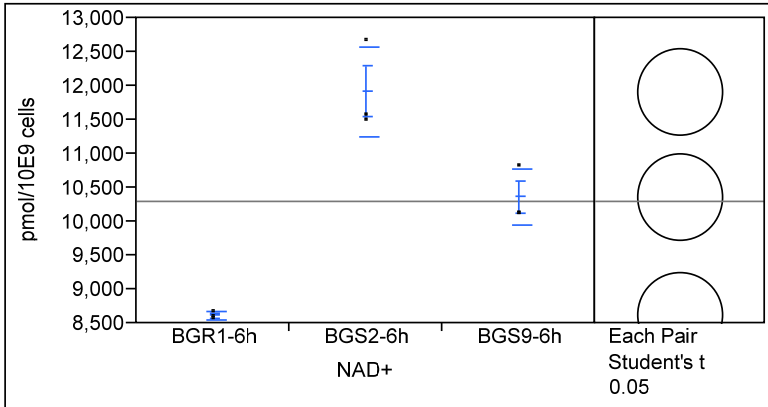

| Strain        | Number of replicates | Mean    | Standard deviation | Connecting Letters | p-value against control |
|---------------|----------------------|---------|--------------------|--------------------|-------------------------|
| BGR1-6 h (LB) | 3                    | 8617.0  | 60.058             | C                  |                         |
| BGS2-6 h (LB) | 3                    | 11914.7 | 652.228            | A                  | <.0001                  |
| BGS9-6 h (LB) | 3                    | 10364.7 | 404.734            | B                  | 0.0030                  |

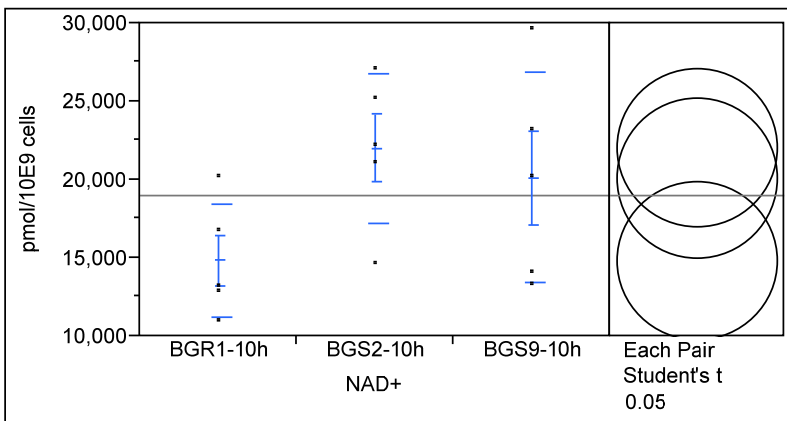

| Strain         | Number of replicates | Mean    | Standard deviation | Connecting Letters | p-value against control |
|----------------|----------------------|---------|--------------------|--------------------|-------------------------|
| BGR1-10 h (LB) | 5                    | 14836.4 | 3652.73            | B                  |                         |
| BGS2-10 h (LB) | 5                    | 22038.2 | 4770.59            | A                  | 0.0494                  |
| BGS9-10 h (LB) | 5                    | 20125.6 | 6732.54            | AB                 | 0.1344                  |

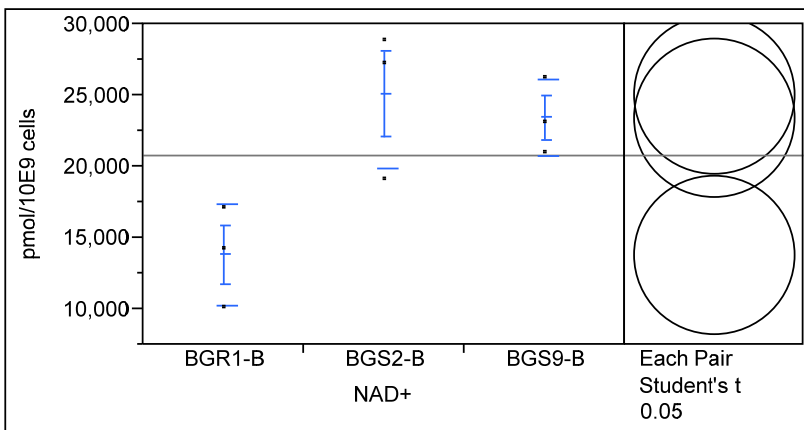

| Strain          | Number of replicates | Mean    | Standard deviation | Connecting Letters | p-value against control |
|-----------------|----------------------|---------|--------------------|--------------------|-------------------------|
| BGR1-10 h (BLB) | 3                    | 13816.0 | 3570.76            | B                  |                         |
| BGS2-10 h (BLB) | 3                    | 25081.0 | 5216.38            | A                  | 0.0131                  |
| BGS9-10 h (BLB) | 3                    | 23451.0 | 2669.36            | A                  | 0.0247                  |

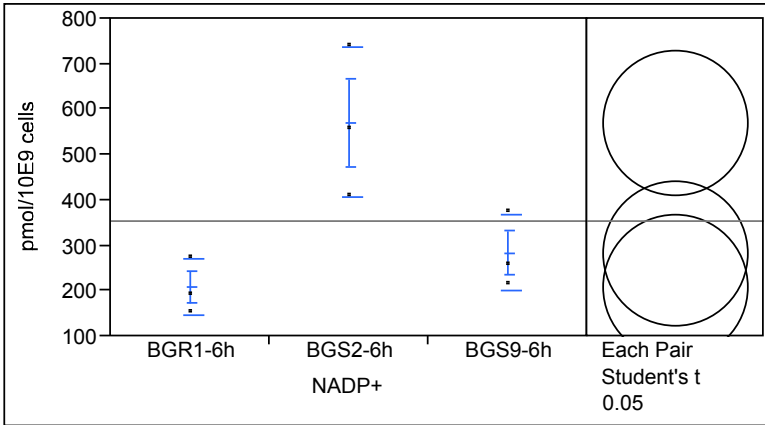

| Strain        | Number of replicates | Mean    | Standard deviation | Connecting Letters | p-value against control |
|---------------|----------------------|---------|--------------------|--------------------|-------------------------|
| BGR1-6 h (LB) | 3                    | 208.000 | 61.579             | B                  |                         |
| BGS2-6 h (LB) | 3                    | 570.667 | 165.258            | A                  | 0.0075                  |
| BGS9-6 h (LB) | 3                    | 284.000 | 82.656             | B                  | 0.4395                  |

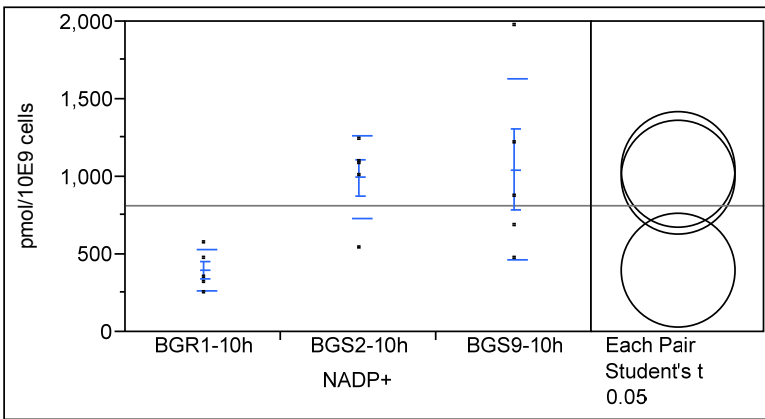

| Strain         | Number of replicates | Mean    | Standard deviation | Connecting Letters | p-value against control |
|----------------|----------------------|---------|--------------------|--------------------|-------------------------|
| BGR1-10 h (LB) | 5                    | 400.00  | 130.658            | B                  |                         |
| BGS2-10 h (LB) | 5                    | 998.20  | 264.867            | A                  | 0.0283                  |
| BGS9-10 h (LB) | 5                    | 1049.40 | 587.197            | A                  | 0.0191                  |

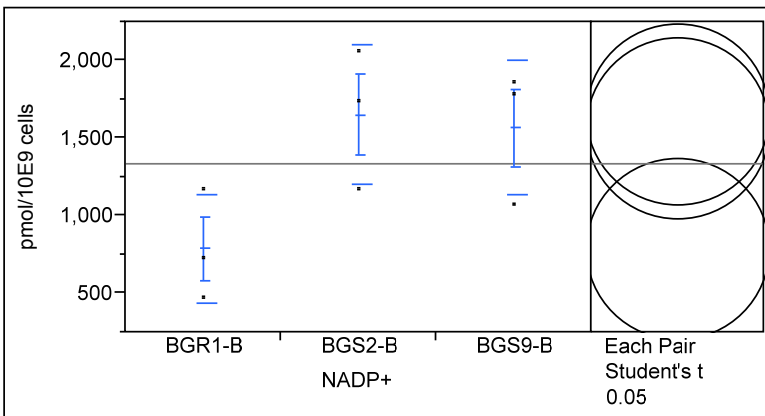

| Strain          | Number of replicates | Mean    | Standard deviation | Connecting Letters | p-value against control |
|-----------------|----------------------|---------|--------------------|--------------------|-------------------------|
| BGR1-10 h (BLB) | 3                    | 789.33  | 352.925            | B                  |                         |
| BGS2-10 h (BLB) | 3                    | 1655.00 | 449.287            | A                  | 0.0427                  |
| BGS9-10 h (BLB) | 3                    | 1569.67 | 431.801            | AB                 | 0.0601                  |

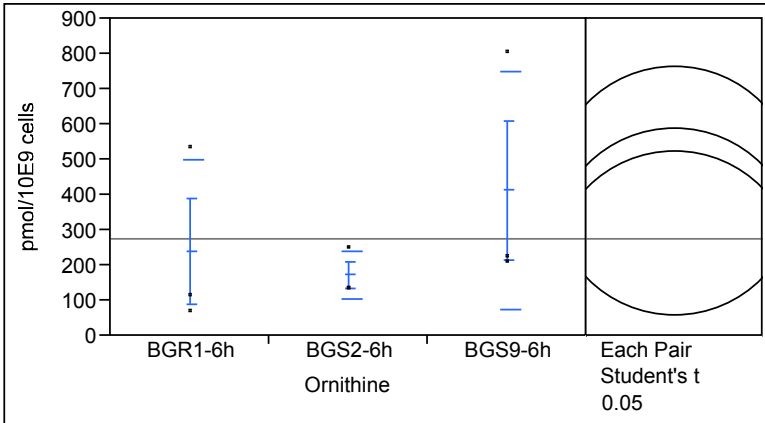

| Strain        | Number of replicates | Mean    | Standard deviation | Connecting Letters | p-value against control |
|---------------|----------------------|---------|--------------------|--------------------|-------------------------|
| BGR1-6 h (LB) | 3                    | 240.333 | 258.039            | A                  |                         |
| BGS2-6 h (LB) | 3                    | 173.667 | 67.002             | A                  | 0.7537                  |
| BGS9-6 h (LB) | 3                    | 412.667 | 338.122            | A                  | 0.4284                  |

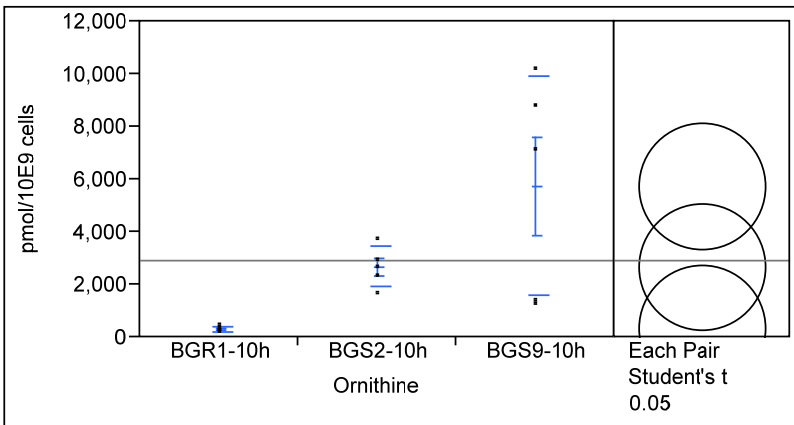

| Strain         | Number of replicates | Mean    | Standard deviation | Connecting Letters | p-value against control |
|----------------|----------------------|---------|--------------------|--------------------|-------------------------|
| BGR1-10 h (LB) | 5                    | 310.80  | 99.83              | B                  |                         |
| BGS2-10 h (LB) | 5                    | 2668.60 | 766.75             | AB                 | 0.1552                  |
| BGS9-10 h (LB) | 5                    | 5760.00 | 4185.57            | A                  | 0.0043                  |

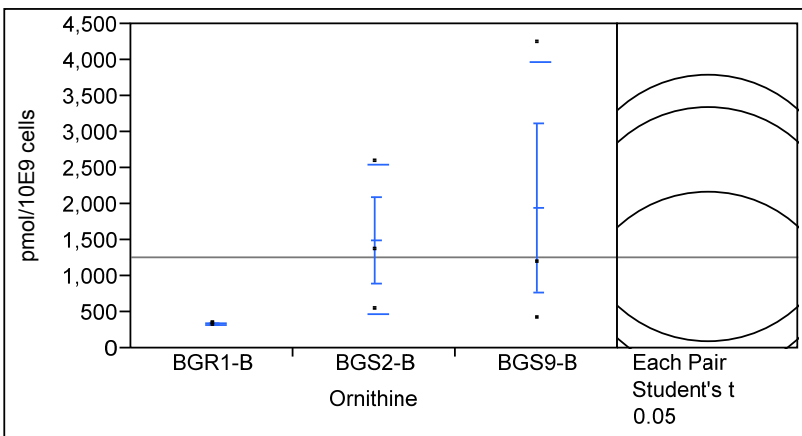

| Strain          | Number of replicates | Mean    | Standard deviation | Connecting Letters | p-value against control |
|-----------------|----------------------|---------|--------------------|--------------------|-------------------------|
| BGR1-10 h (BLB) | 3                    | 336.67  | 10.97              | A                  |                         |
| BGS2-10 h (BLB) | 3                    | 1506.33 | 1035.66            | A                  | 0.3159                  |
| BGS9-10 h (BLB) | 3                    | 1950.67 | 2017.77            | A                  | 0.1819                  |

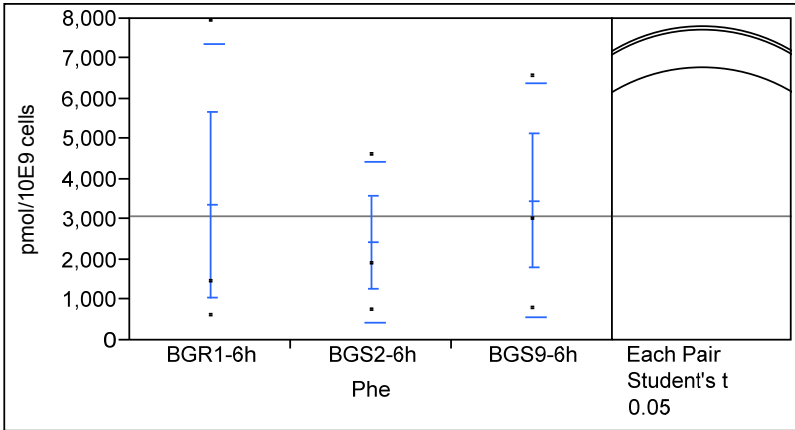

| Strain        | Number of replicates | Mean    | Standard deviation | Connecting Letters | p-value against control |
|---------------|----------------------|---------|--------------------|--------------------|-------------------------|
| BGR1-6 h (LB) | 3                    | 3362.00 | 4006.43            | A                  |                         |
| BGS2-6 h (LB) | 3                    | 2431.00 | 1999.22            | A                  | 0.7243                  |
| BGS9-6 h (LB) | 3                    | 3481.33 | 2911.74            | A                  | 0.9637                  |

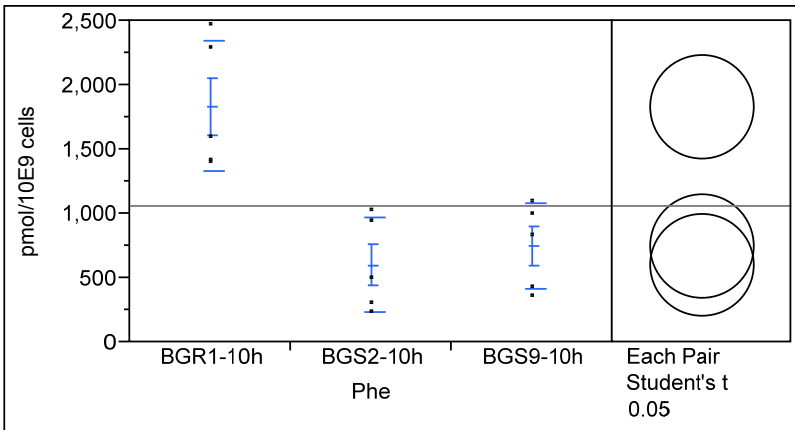

| Strain         | Number of replicates | Mean    | Standard deviation | Connecting Letters | p-value against control |
|----------------|----------------------|---------|--------------------|--------------------|-------------------------|
| BGR1-10 h (LB) | 5                    | 1835.00 | 507.590            | A                  |                         |
| BGS2-10 h (LB) | 5                    | 602.40  | 366.880            | B                  | 0.0005                  |
| BGS9-10 h (LB) | 5                    | 747.60  | 334.024            | B                  | 0.0012                  |

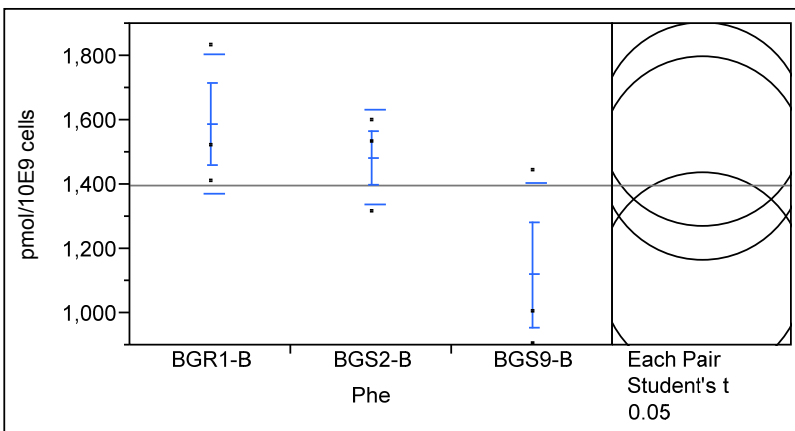

| Strain          | Number of replicates | Mean    | Standard deviation | Connecting Letters | p-value against control |
|-----------------|----------------------|---------|--------------------|--------------------|-------------------------|
| BGR1-10 h (BLB) | 3                    | 1589.33 | 218.660            | A                  |                         |
| BGS2-10 h (BLB) | 3                    | 1484.33 | 146.936            | AB                 | 0.5887                  |
| BGS9-10 h (BLB) | 3                    | 1119.67 | 287.683            | B                  | 0.0433                  |

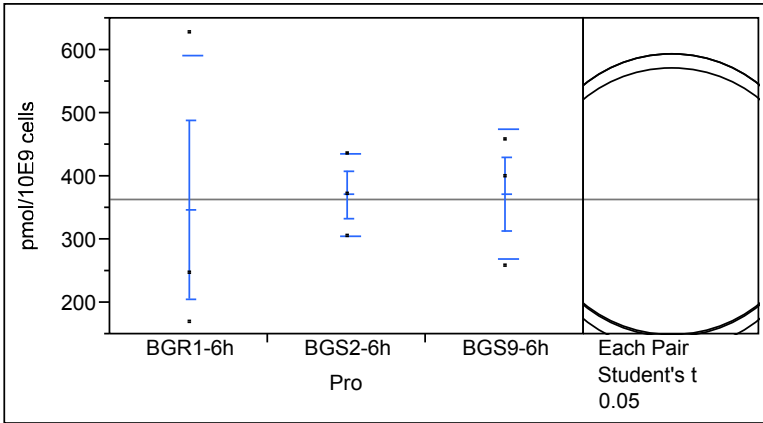

| Strain        | Number of replicates | Mean    | Standard deviation | Connecting Letters | p-value against control |
|---------------|----------------------|---------|--------------------|--------------------|-------------------------|
| BGR1-6 h (LB) | 3                    | 348.000 | 244.829            | A                  |                         |
| BGS2-6 h (LB) | 3                    | 371.333 | 65.501             | A                  | 0.8622                  |
| BGS9-6 h (LB) | 3                    | 372.000 | 102.211            | A                  | 0.8583                  |

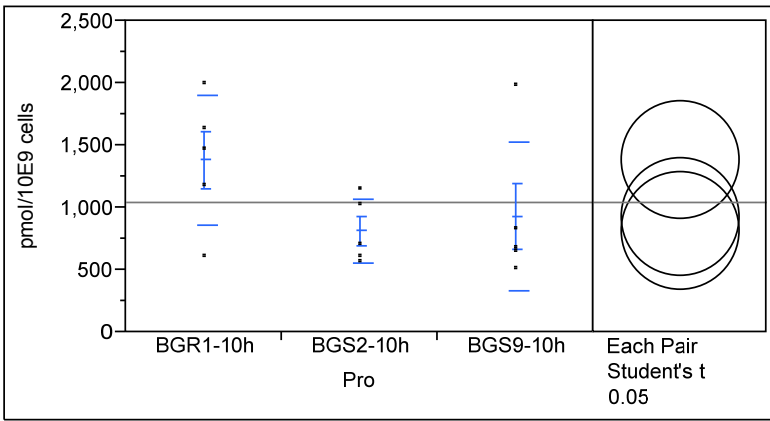

| Strain         | Number of replicates | Mean    | Standard deviation | Connecting Letters | p-value against control |
|----------------|----------------------|---------|--------------------|--------------------|-------------------------|
| BGR1-10 h (LB) | 5                    | 1385.00 | 520.846            | A                  |                         |
| BGS2-10 h (LB) | 5                    | 816.40  | 259.335            | A                  | 0.0866                  |
| BGS9-10 h (LB) | 5                    | 930.20  | 597.985            | A                  | 0.1613                  |

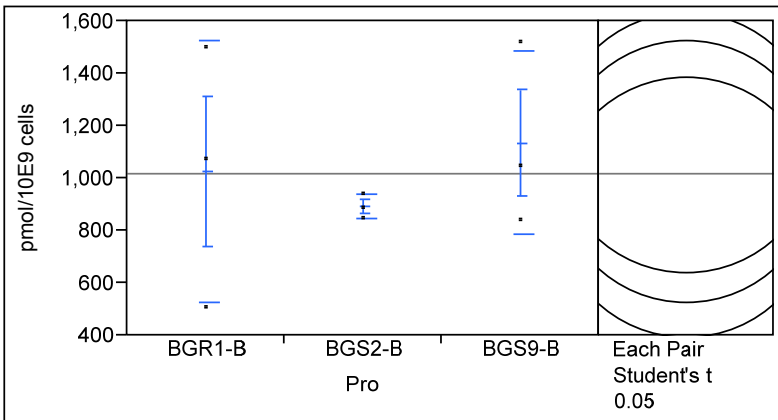

| Strain          | Number of replicates | Mean    | Standard deviation | Connecting Letters | p-value against control |
|-----------------|----------------------|---------|--------------------|--------------------|-------------------------|
| BGR1-10 h (BLB) | 3                    | 1027.33 | 497.506            | A                  |                         |
| BGS2-10 h (BLB) | 3                    | 891.67  | 46.522             | A                  | 0.6538                  |
| BGS9-10 h (BLB) | 3                    | 1134.67 | 349.923            | A                  | 0.7218                  |

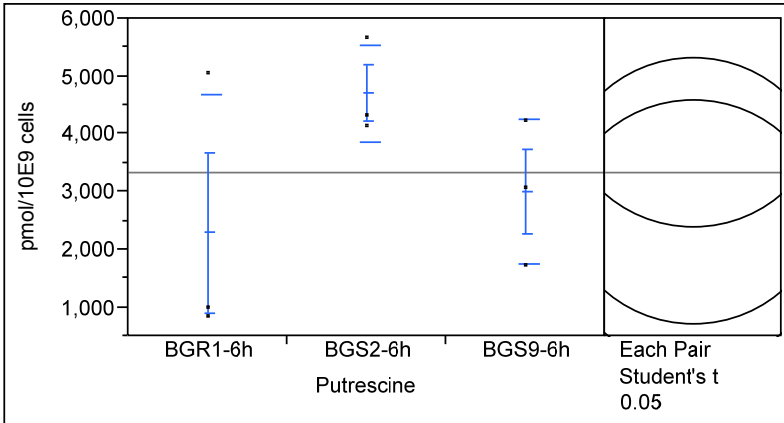

| Strain        | Number of replicates | Mean    | Standard deviation | Connecting Letters | p-value against control |
|---------------|----------------------|---------|--------------------|--------------------|-------------------------|
| BGR1-6 h (LB) | 3                    | 2287.67 | 2391.16            | A                  |                         |
| BGS2-6 h (LB) | 3                    | 4710.00 | 840.35             | A                  | 0.1193                  |
| BGS9-6 h (LB) | 3                    | 3008.00 | 1259.47            | A                  | 0.6087                  |

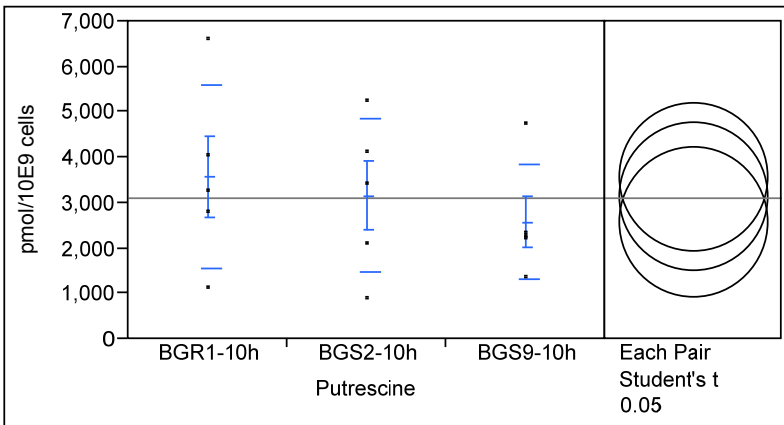

| Strain         | Number of replicates | Mean    | Standard deviation | Connecting Letters | p-value against control |
|----------------|----------------------|---------|--------------------|--------------------|-------------------------|
| BGR1-10 h (LB) | 5                    | 3576.60 | 2008.78            | A                  |                         |
| BGS2-10 h (LB) | 5                    | 3160.00 | 1700.60            | A                  | 0.7028                  |
| BGS9-10 h (LB) | 5                    | 2580.40 | 1263.58            | A                  | 0.3685                  |

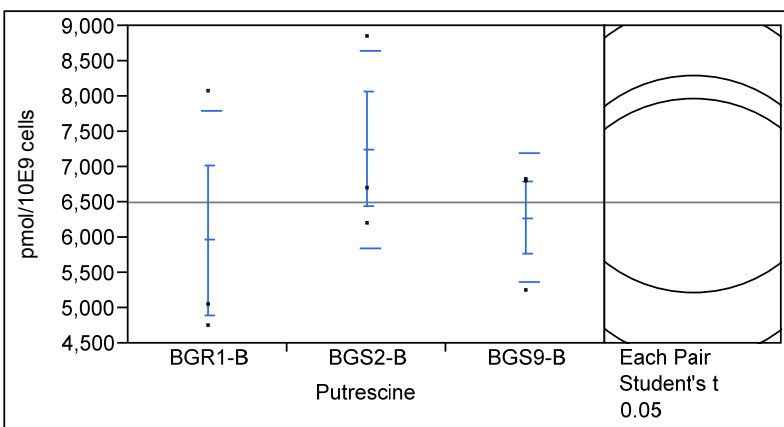

| Strain          | Number of replicates | Mean    | Standard deviation | Connecting Letters | p-value against control |
|-----------------|----------------------|---------|--------------------|--------------------|-------------------------|
| BGR1-10 h (BLB) | 3                    | 5963.67 | 1838.48            | A                  |                         |
| BGS2-10 h (BLB) | 3                    | 7256.67 | 1401.21            | A                  | 0.3112                  |
| BGS9-10 h (BLB) | 3                    | 6287.00 | 900.76             | A                  | 0.7915                  |



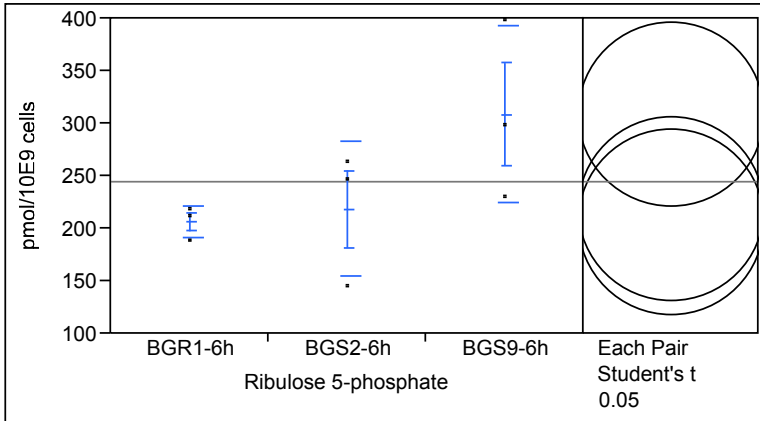

| Strain        | Number of replicates | Mean    | Standard deviation | Connecting Letters | p-value against control |
|---------------|----------------------|---------|--------------------|--------------------|-------------------------|
| BGR1-6 h (LB) | 3                    | 206.667 | 15.6950            | A                  |                         |
| BGS2-6 h (LB) | 3                    | 218.667 | 64.3610            | A                  | 0.8204                  |
| BGS9-6 h (LB) | 3                    | 309.000 | 84.4452            | A                  | 0.0896                  |

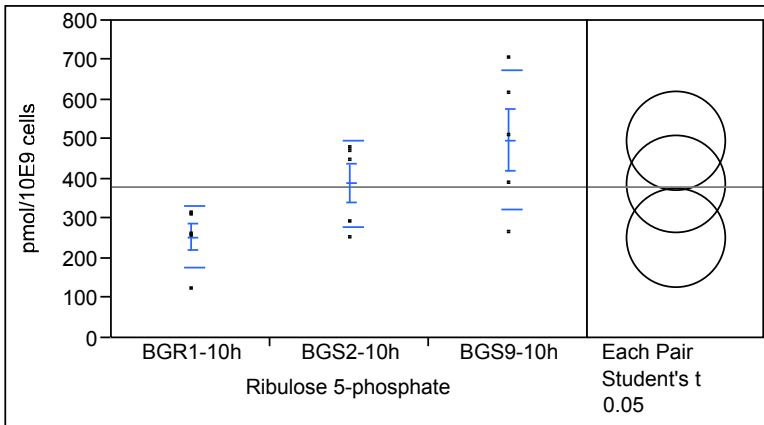

| Strain         | Number of replicates | Mean    | Standard deviation | Connecting Letters | p-value against control |
|----------------|----------------------|---------|--------------------|--------------------|-------------------------|
| BGR1-10 h (LB) | 5                    | 254.400 | 76.768             | B                  |                         |
| BGS2-10 h (LB) | 5                    | 389.200 | 108.682            | AB                 | 0.1192                  |
| BGS9-10 h (LB) | 5                    | 499.000 | 175.231            | A                  | 0.0102                  |

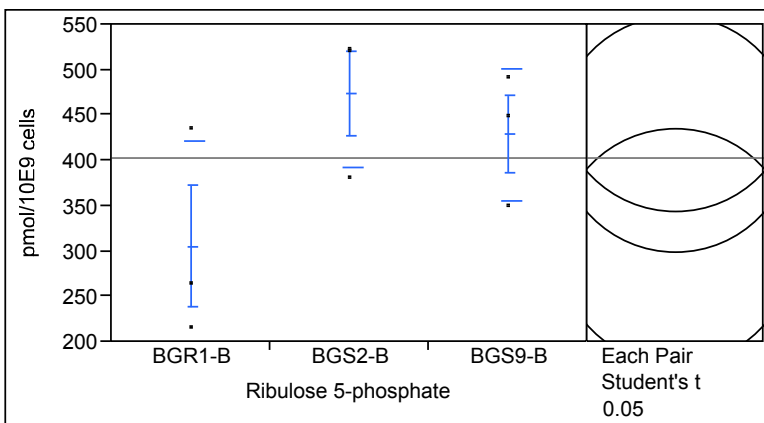

| Strain          | Number of replicates | Mean    | Standard deviation | Connecting Letters | p-value against control |
|-----------------|----------------------|---------|--------------------|--------------------|-------------------------|
| BGR1-10 h (BLB) | 3                    | 305.333 | 115.889            | A                  |                         |
| BGS2-10 h (BLB) | 3                    | 474.333 | 81.697             | A                  | 0.0655                  |
| BGS9-10 h (BLB) | 3                    | 429.333 | 72.817             | A                  | 0.1500                  |

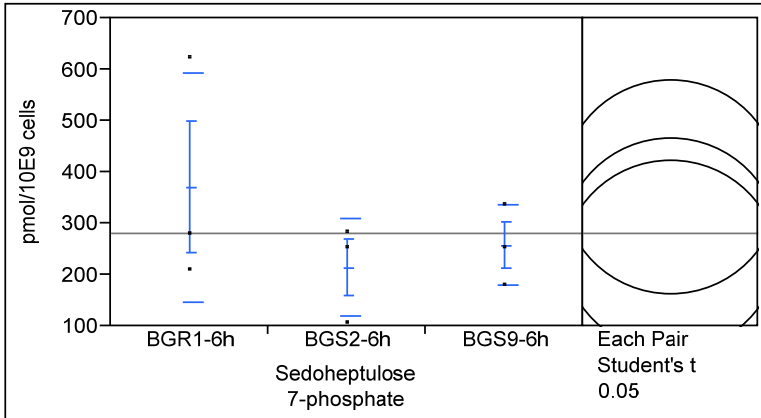

| Strain        | Number of replicates | Mean    | Standard deviation | Connecting Letters | p-value against control |
|---------------|----------------------|---------|--------------------|--------------------|-------------------------|
| BGR1-6 h (LB) | 3                    | 371.000 | 222.738            | A                  |                         |
| BGS2-6 h (LB) | 3                    | 214.333 | 95.259             | A                  | 0.2397                  |
| BGS9-6 h (LB) | 3                    | 257.333 | 78.590             | A                  | 0.3803                  |

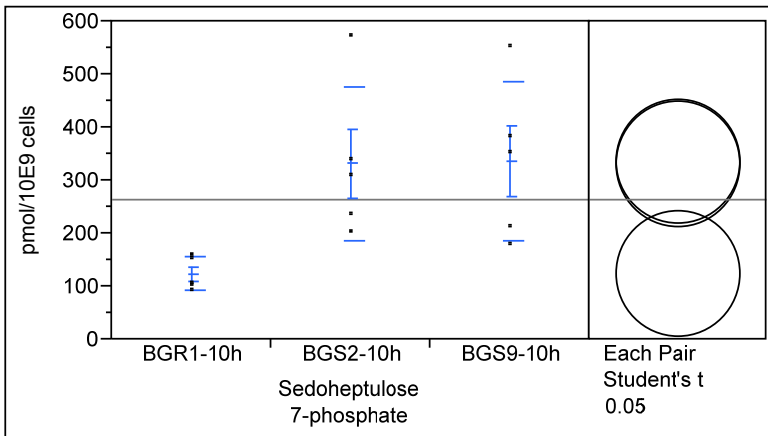

| Strain         | Number of replicates | Mean    | Standard deviation | Connecting Letters | p-value against control |
|----------------|----------------------|---------|--------------------|--------------------|-------------------------|
| BGR1-10 h (LB) | 5                    | 123.600 | 31.453             | B                  |                         |
| BGS2-10 h (LB) | 5                    | 332.000 | 144.964            | A                  | 0.0187                  |
| BGS9-10 h (LB) | 5                    | 336.600 | 148.717            | A                  | 0.0167                  |

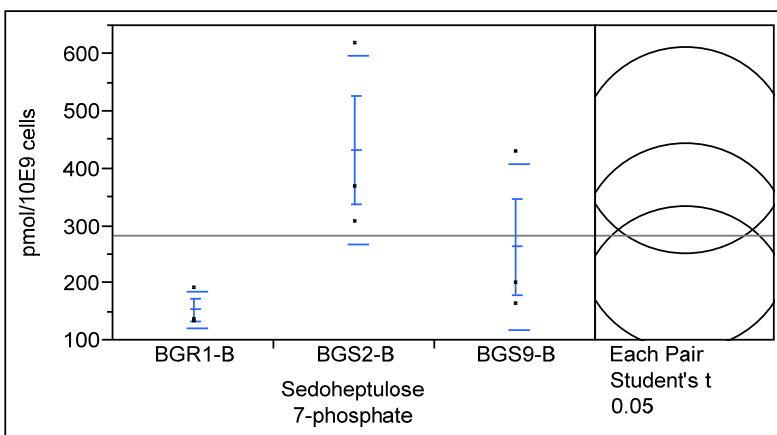

| Strain          | Number of replicates | Mean    | Standard deviation | Connecting Letters | p-value against control |
|-----------------|----------------------|---------|--------------------|--------------------|-------------------------|
| BGR1-10 h (BLB) | 3                    | 154.000 | 32.924             | B                  |                         |
| BGS2-10 h (BLB) | 3                    | 432.000 | 164.612            | A                  | 0.0375                  |
| BGS9-10 h (BLB) | 3                    | 264.333 | 144.659            | AB                 | 0.3315                  |

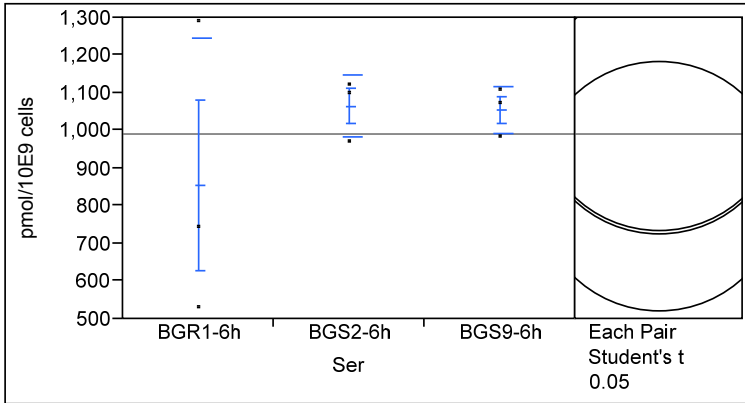

| Strain        | Number of replicates | Mean    | Standard deviation | Connecting Letters | p-value against control |
|---------------|----------------------|---------|--------------------|--------------------|-------------------------|
| BGR1-6 h (LB) | 3                    | 854.67  | 391.480            | A                  |                         |
| BGS2-6 h (LB) | 3                    | 1065.33 | 81.715             | A                  | 0.3121                  |
| BGS9-6 h (LB) | 3                    | 1056.33 | 63.658             | A                  | 0.3314                  |

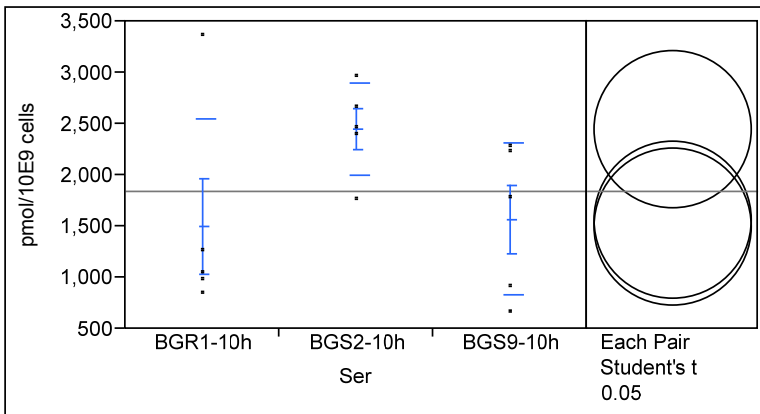

| Strain         | Number of replicates | Mean    | Standard deviation | Connecting Letters | p-value against control |
|----------------|----------------------|---------|--------------------|--------------------|-------------------------|
| BGR1-10 h (LB) | 5                    | 1503.20 | 1052.18            | A                  |                         |
| BGS2-10 h (LB) | 5                    | 2452.00 | 444.36             | A                  | 0.0810                  |
| BGS9-10 h (LB) | 5                    | 1574.40 | 745.04             | A                  | 0.8887                  |

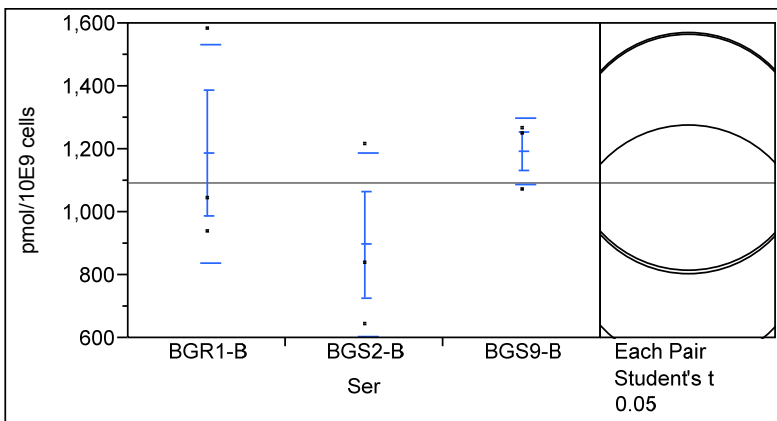

| Strain          | Number of replicates | Mean    | Standard deviation | Connecting Letters | p-value against control |
|-----------------|----------------------|---------|--------------------|--------------------|-------------------------|
| BGR1-10 h (BLB) | 3                    | 1188.00 | 346.866            | A                  |                         |
| BGS2-10 h (BLB) | 3                    | 899.00  | 291.979            | A                  | 0.2363                  |
| BGS9-10 h (BLB) | 3                    | 1194.67 | 107.361            | A                  | 0.9768                  |

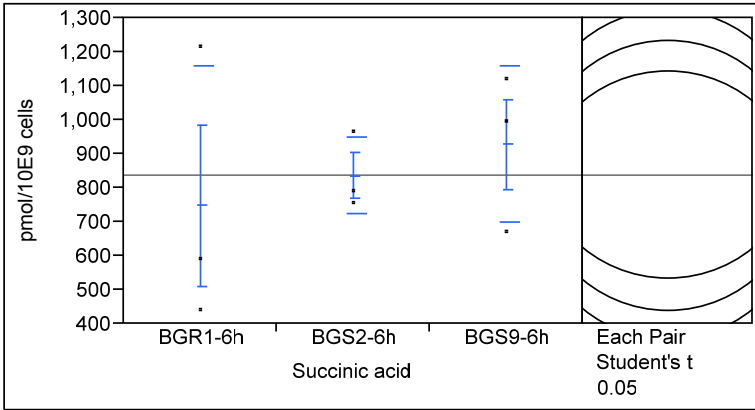

| Strain        | Number of replicates | Mean    | Standard deviation | Connecting Letters | p-value against control |
|---------------|----------------------|---------|--------------------|--------------------|-------------------------|
| BGR1-6 h (LB) | 3                    | 749.000 | 411.605            | A                  |                         |
| BGS2-6 h (LB) | 3                    | 837.000 | 114.175            | A                  | 0.7138                  |
| BGS9-6 h (LB) | 3                    | 928.667 | 230.498            | A                  | 0.4622                  |

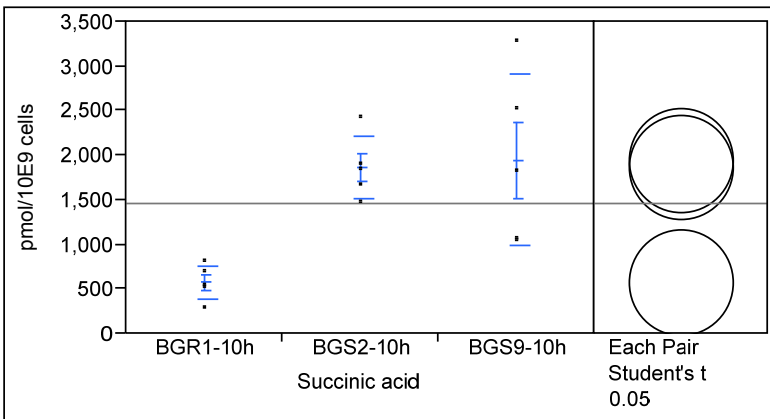

| Strain         | Number of replicates | Mean    | Standard deviation | Connecting Letters | p-value against control |
|----------------|----------------------|---------|--------------------|--------------------|-------------------------|
| BGR1-10 h (LB) | 5                    | 574.40  | 193.470            | B                  |                         |
| BGS2-10 h (LB) | 5                    | 1868.00 | 356.852            | A                  | 0.0054                  |
| BGS9-10 h (LB) | 5                    | 1947.60 | 964.073            | A                  | 0.0037                  |

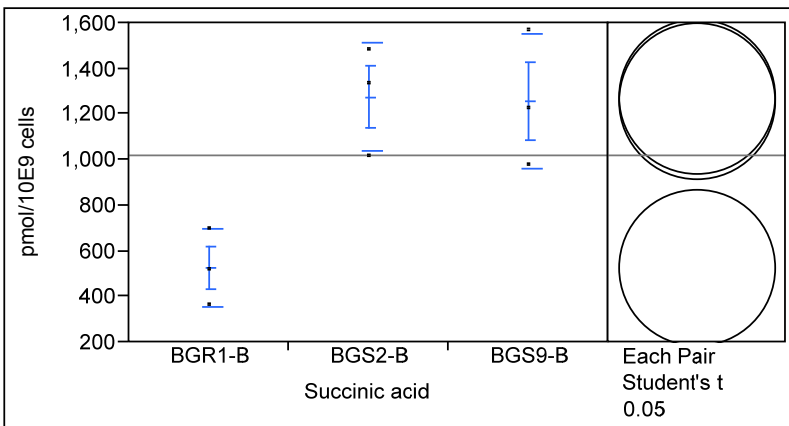

| Strain          | Number of replicates | Mean    | Standard deviation | Connecting Letters | p-value against control |
|-----------------|----------------------|---------|--------------------|--------------------|-------------------------|
| BGR1-10 h (BLB) | 3                    | 526.67  | 168.099            | B                  |                         |
| BGS2-10 h (BLB) | 3                    | 1275.33 | 239.091            | A                  | 0.0089                  |
| BGS9-10 h (BLB) | 3                    | 1258.00 | 297.138            | A                  | 0.0098                  |

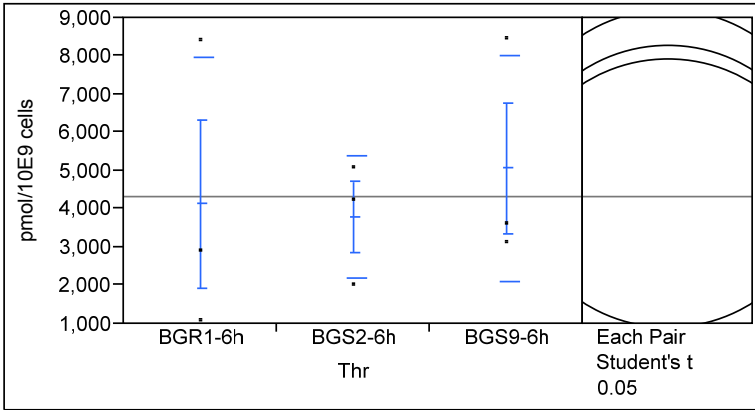

| Strain        | Number of replicates | Mean    | Standard deviation | Connecting Letters | p-value against control |
|---------------|----------------------|---------|--------------------|--------------------|-------------------------|
| BGR1-6 h (LB) | 3                    | 4133.67 | 3828.58            | A                  |                         |
| BGS2-6 h (LB) | 3                    | 3797.33 | 1583.44            | A                  | 0.8930                  |
| BGS9-6 h (LB) | 3                    | 5068.33 | 2944.23            | A                  | 0.7099                  |

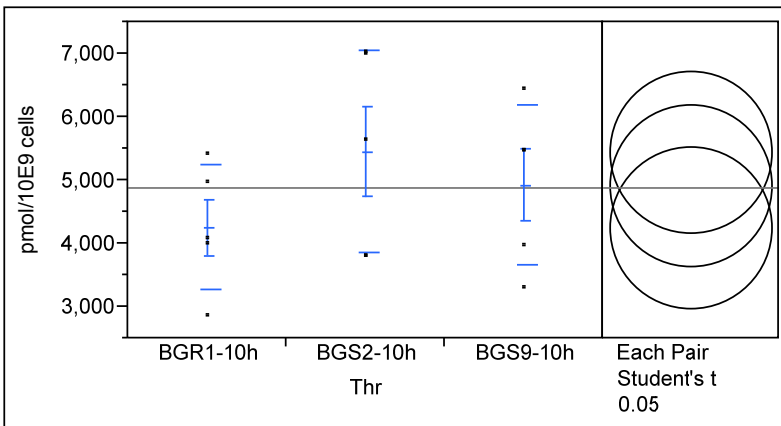

| Strain         | Number of replicates | Mean    | Standard deviation | Connecting Letters | p-value against control |
|----------------|----------------------|---------|--------------------|--------------------|-------------------------|
| BGR1-10 h (LB) | 5                    | 4259.80 | 989.70             | A                  |                         |
| BGS2-10 h (LB) | 5                    | 5454.40 | 1605.10            | A                  | 0.1759                  |
| BGS9-10 h (LB) | 5                    | 4927.00 | 1271.89            | A                  | 0.4374                  |

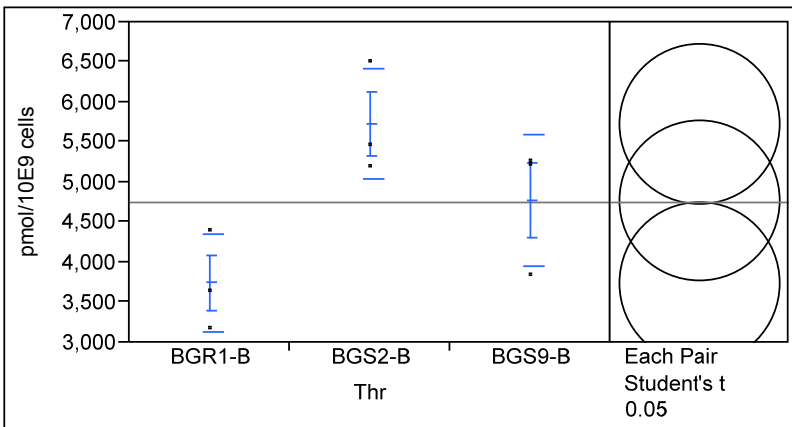

| Strain          | Number of replicates | Mean    | Standard deviation | Connecting Letters | p-value against control |
|-----------------|----------------------|---------|--------------------|--------------------|-------------------------|
| BGR1-10 h (BLB) | 3                    | 3746.00 | 610.224            | B                  |                         |
| BGS2-10 h (BLB) | 3                    | 5728.33 | 693.574            | A                  | 0.0142                  |
| BGS9-10 h (BLB) | 3                    | 4779.00 | 812.470            | AB                 | 0.1252                  |

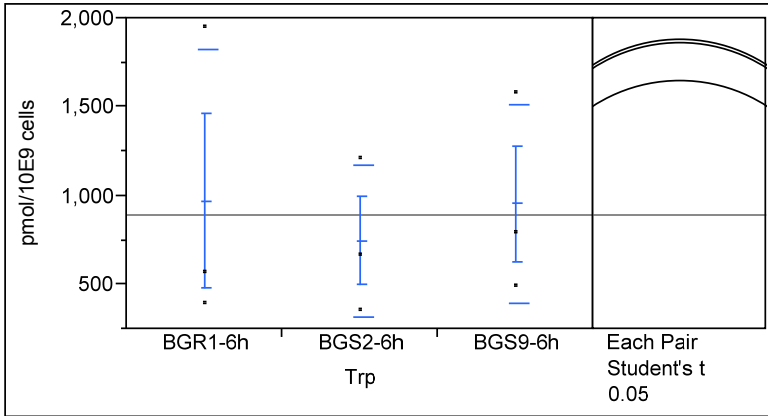

| Strain        | Number of replicates | Mean    | Standard deviation | Connecting Letters | p-value against control |
|---------------|----------------------|---------|--------------------|--------------------|-------------------------|
| BGR1-6 h (LB) | 3                    | 974.000 | 854.978            | A                  |                         |
| BGS2-6 h (LB) | 3                    | 747.333 | 430.967            | A                  | 0.6799                  |
| BGS9-6 h (LB) | 3                    | 957.333 | 560.420            | A                  | 0.9756                  |

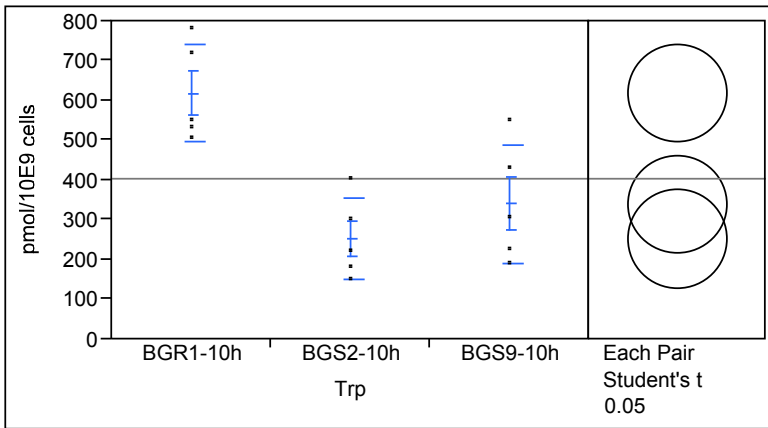

| Strain         | Number of replicates | Mean    | Standard deviation | Connecting Letters | p-value against control |
|----------------|----------------------|---------|--------------------|--------------------|-------------------------|
| BGR1-10 h (LB) | 5                    | 619.800 | 123.532            | A                  |                         |
| BGS2-10 h (LB) | 5                    | 253.000 | 102.608            | B                  | 0.0006                  |
| BGS9-10 h (LB) | 5                    | 340.400 | 148.781            | B                  | 0.0044                  |

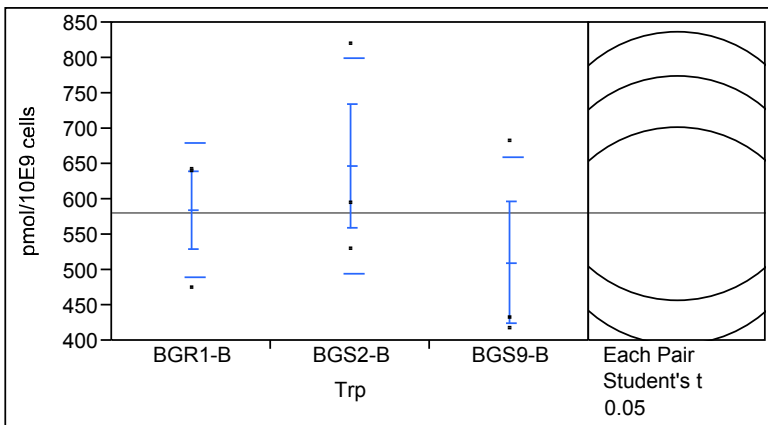

| Strain          | Number of replicates | Mean    | Standard deviation | Connecting Letters | p-value against control |
|-----------------|----------------------|---------|--------------------|--------------------|-------------------------|
| BGR1-10 h (BLB) | 3                    | 585.000 | 96.141             | A                  |                         |
| BGS2-10 h (BLB) | 3                    | 647.333 | 152.179            | A                  | 0.5922                  |
| BGS9-10 h (BLB) | 3                    | 511.000 | 149.171            | A                  | 0.5269                  |

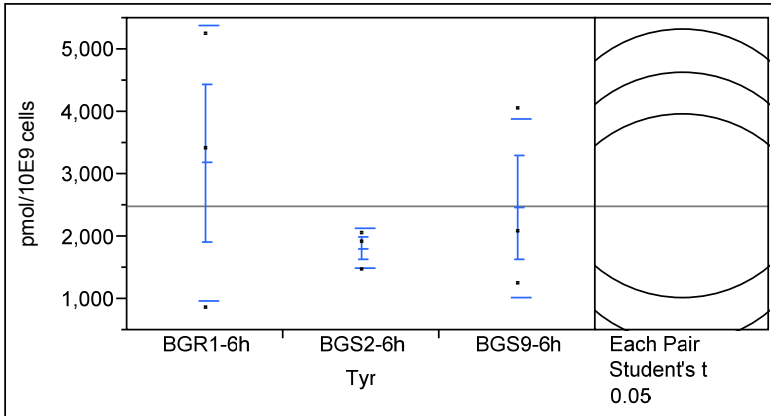

| Strain        | Number of replicates | Mean    | Standard deviation | Connecting Letters | p-value against control |
|---------------|----------------------|---------|--------------------|--------------------|-------------------------|
| BGR1-6 h (LB) | 3                    | 3180.67 | 2207.42            | A                  |                         |
| BGS2-6 h (LB) | 3                    | 1819.33 | 310.97             | A                  | 0.3176                  |
| BGS9-6 h (LB) | 3                    | 2469.00 | 1431.82            | A                  | 0.5895                  |

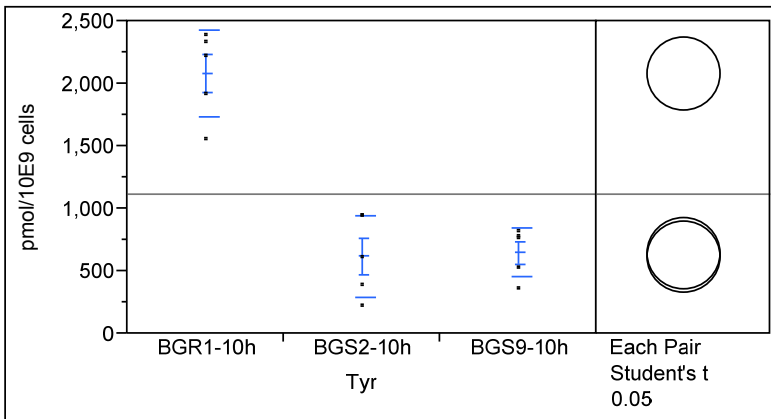

| Strain         | Number of replicates | Mean    | Standard deviation | Connecting Letters | p-value against control |
|----------------|----------------------|---------|--------------------|--------------------|-------------------------|
| BGR1-10 h (LB) | 5                    | 2083.40 | 344.288            | A                  |                         |
| BGS2-10 h (LB) | 5                    | 620.20  | 321.882            | B                  | <.0001                  |
| BGS9-10 h (LB) | 5                    | 647.60  | 194.387            | B                  | <.0001                  |

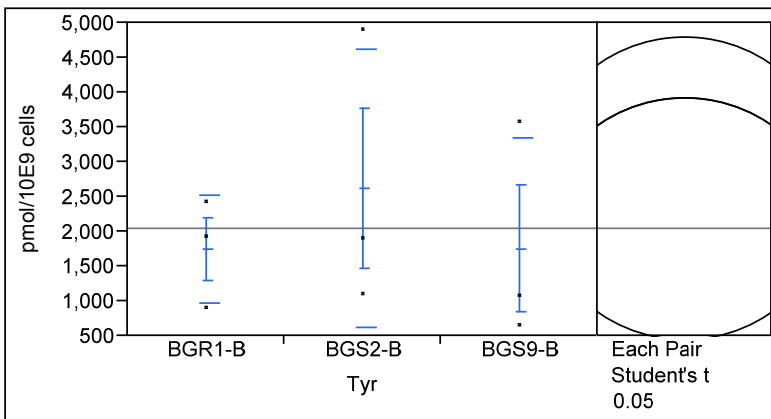

| Strain          | Number of replicates | Mean    | Standard deviation | Connecting Letters | p-value against control |
|-----------------|----------------------|---------|--------------------|--------------------|-------------------------|
| BGR1-10 h (BLB) | 3                    | 1754.00 | 770.21             | A                  |                         |
| BGS2-10 h (BLB) | 3                    | 2630.00 | 2004.22            | A                  | 0.5115                  |
| BGS9-10 h (BLB) | 3                    | 1761.33 | 1576.67            | A                  | 0.9955                  |

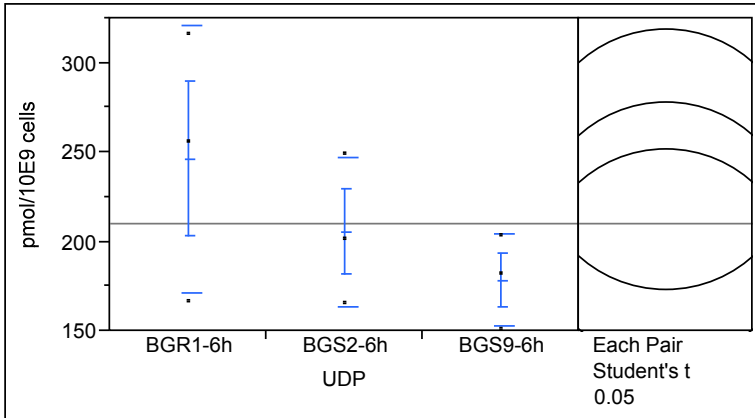

| Strain        | Number of replicates | Mean    | Standard deviation | Connecting Letters | p-value against control |
|---------------|----------------------|---------|--------------------|--------------------|-------------------------|
| BGR1-6 h (LB) | 3                    | 246.333 | 74.9689            | A                  |                         |
| BGS2-6 h (LB) | 3                    | 205.667 | 41.6213            | A                  | 0.3731                  |
| BGS9-6 h (LB) | 3                    | 178.667 | 26.1598            | A                  | 0.1605                  |

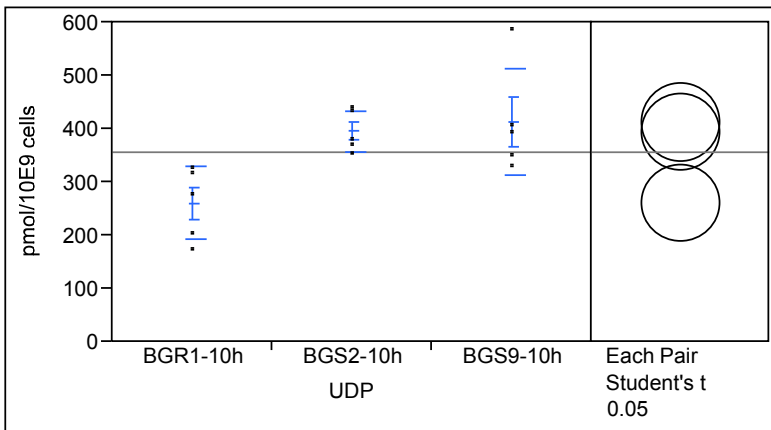

| Strain         | Number of replicates | Mean    | Standard deviation | Connecting Letters | p-value against control |
|----------------|----------------------|---------|--------------------|--------------------|-------------------------|
| BGR1-10 h (LB) | 5                    | 260.400 | 68.259             | B                  |                         |
| BGS2-10 h (LB) | 5                    | 395.400 | 37.766             | A                  | 0.0136                  |
| BGS9-10 h (LB) | 5                    | 413.400 | 101.350            | A                  | 0.0066                  |

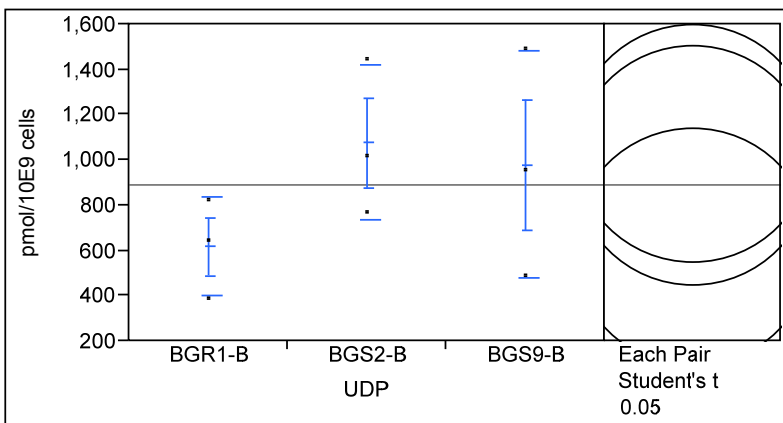

| Strain          | Number of replicates | Mean    | Standard deviation | Connecting Letters | p-value against control |
|-----------------|----------------------|---------|--------------------|--------------------|-------------------------|
| BGR1-10 h (BLB) | 3                    | 617.67  | 218.482            | A                  |                         |
| BGS2-10 h (BLB) | 3                    | 1076.67 | 343.523            | A                  | 0.1824                  |
| BGS9-10 h (BLB) | 3                    | 978.33  | 501.480            | A                  | 0.2810                  |



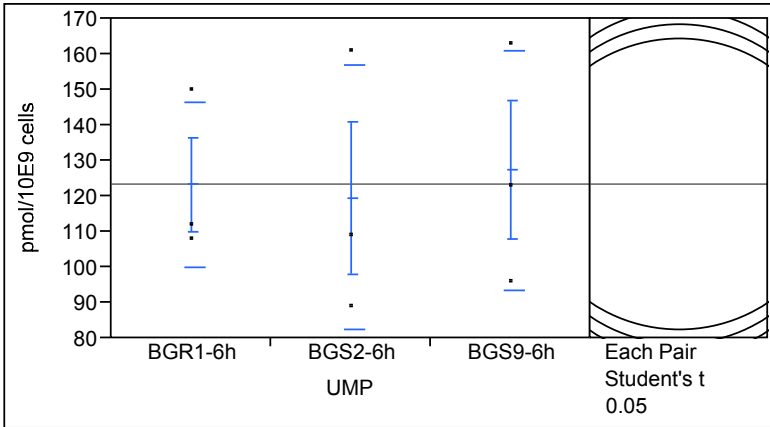

| Strain        | Number of replicates | Mean    | Standard deviation | Connecting Letters | p-value against control |
|---------------|----------------------|---------|--------------------|--------------------|-------------------------|
| BGR1-6 h (LB) | 3                    | 123.333 | 23.1805            | A                  |                         |
| BGS2-6 h (LB) | 3                    | 119.667 | 37.1663            | A                  | 0.8927                  |
| BGS9-6 h (LB) | 3                    | 127.333 | 33.7095            | A                  | 0.8830                  |

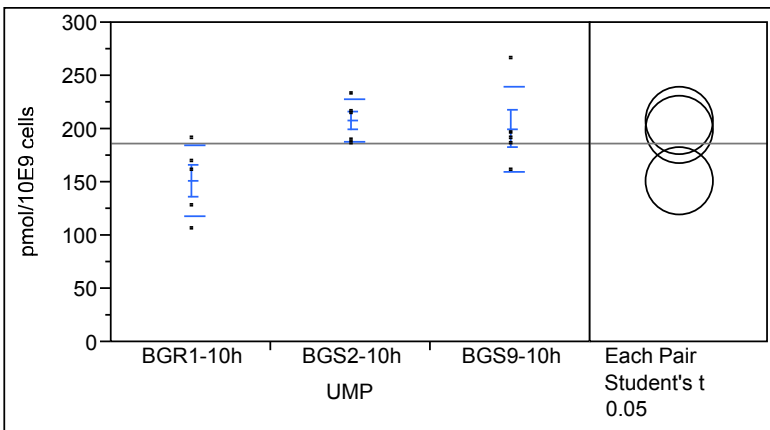

| Strain         | Number of replicates | Mean    | Standard deviation | Connecting Letters | p-value against control |
|----------------|----------------------|---------|--------------------|--------------------|-------------------------|
| BGR1-10 h (LB) | 5                    | 151.400 | 33.7979            | B                  |                         |
| BGS2-10 h (LB) | 5                    | 208.000 | 19.6596            | A                  | 0.0165                  |
| BGS9-10 h (LB) | 5                    | 200.400 | 39.6396            | A                  | 0.0329                  |

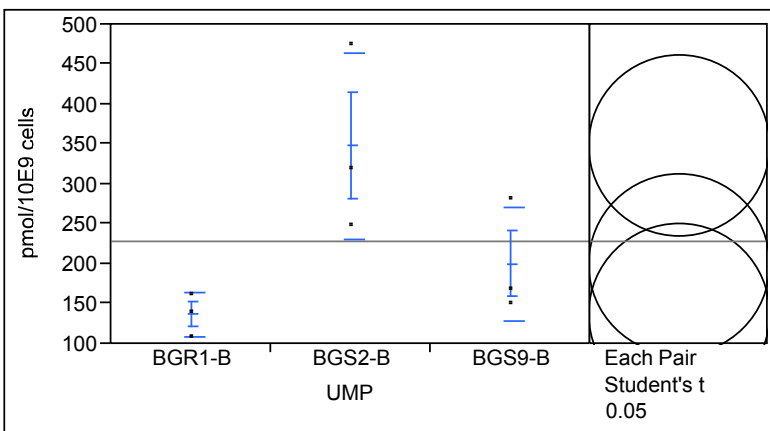

| Strain          | Number of replicates | Mean    | Standard deviation | Connecting Letters | p-value against control |
|-----------------|----------------------|---------|--------------------|--------------------|-------------------------|
| BGR1-10 h (BLB) | 3                    | 137.000 | 27.221             | B                  |                         |
| BGS2-10 h (BLB) | 3                    | 348.333 | 116.432            | A                  | 0.0180                  |
| BGS9-10 h (BLB) | 3                    | 200.667 | 70.890             | AB                 | 0.3688                  |

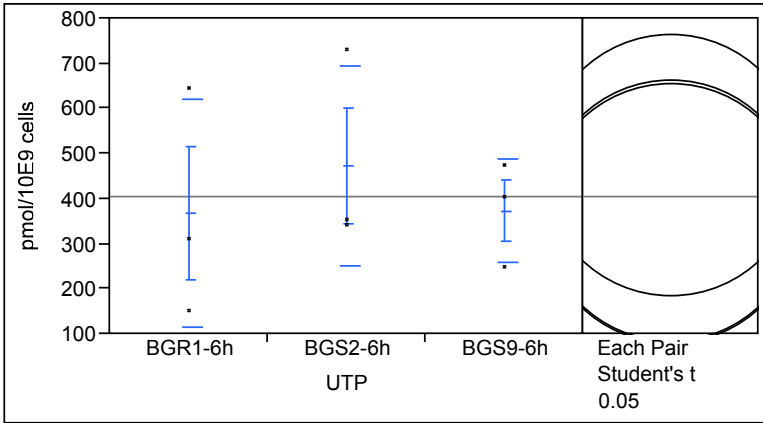

| Strain        | Number of replicates | Mean    | Standard deviation | Connecting Letters | p-value against control |
|---------------|----------------------|---------|--------------------|--------------------|-------------------------|
| BGR1-6 h (LB) | 3                    | 368.333 | 252.603            | A                  |                         |
| BGS2-6 h (LB) | 3                    | 474.000 | 220.905            | A                  | 0.5511                  |
| BGS9-6 h (LB) | 3                    | 374.000 | 115.948            | A                  | 0.9741                  |

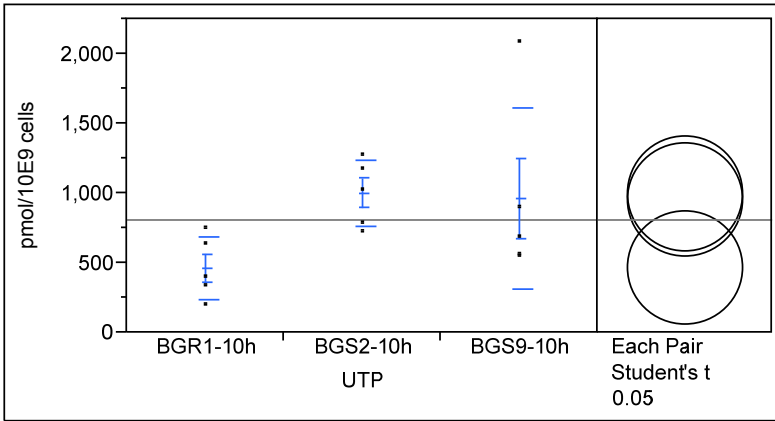

| Strain         | Number of replicates | Mean    | Standard deviation | Connecting Letters | p-value against control |
|----------------|----------------------|---------|--------------------|--------------------|-------------------------|
| BGR1-10 h (LB) | 5                    | 466.00  | 223.231            | A                  |                         |
| BGS2-10 h (LB) | 5                    | 1000.20 | 237.370            | A                  | 0.0664                  |
| BGS9-10 h (LB) | 5                    | 960.40  | 647.257            | A                  | 0.0863                  |

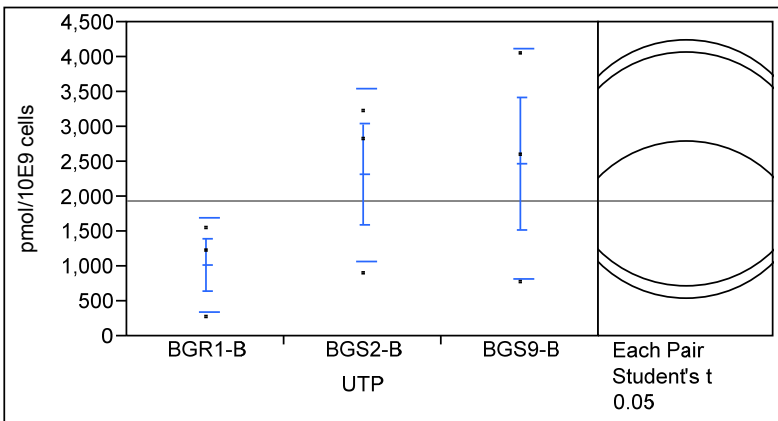

| Strain          | Number of replicates | Mean    | Standard deviation | Connecting Letters | p-value against control |
|-----------------|----------------------|---------|--------------------|--------------------|-------------------------|
| BGR1-10 h (BLB) | 3                    | 1024.33 | 664.55             | A                  |                         |
| BGS2-10 h (BLB) | 3                    | 2321.33 | 1240.99            | A                  | 0.2505                  |
| BGS9-10 h (BLB) | 3                    | 2478.67 | 1642.27            | A                  | 0.2037                  |

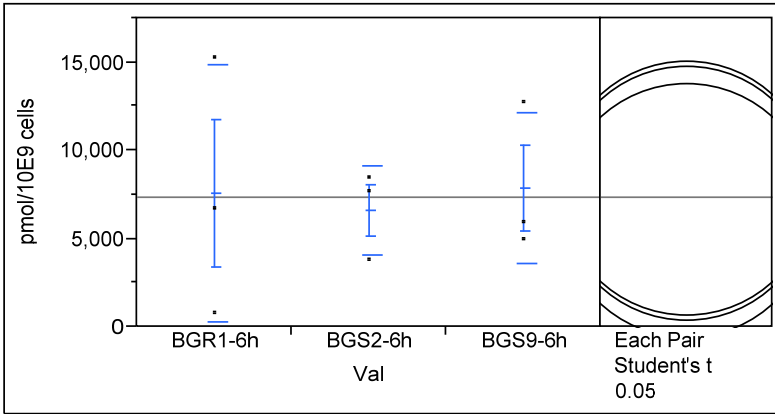

| Strain        | Number of replicates | Mean    | Standard deviation | Connecting Letters | p-value against control |
|---------------|----------------------|---------|--------------------|--------------------|-------------------------|
| BGR1-6 h (LB) | 3                    | 7591.00 | 7290.72            | A                  |                         |
| BGS2-6 h (LB) | 3                    | 6603.00 | 2495.84            | A                  | 0.8199                  |
| BGS9-6 h (LB) | 3                    | 7879.00 | 4268.19            | A                  | 0.9470                  |

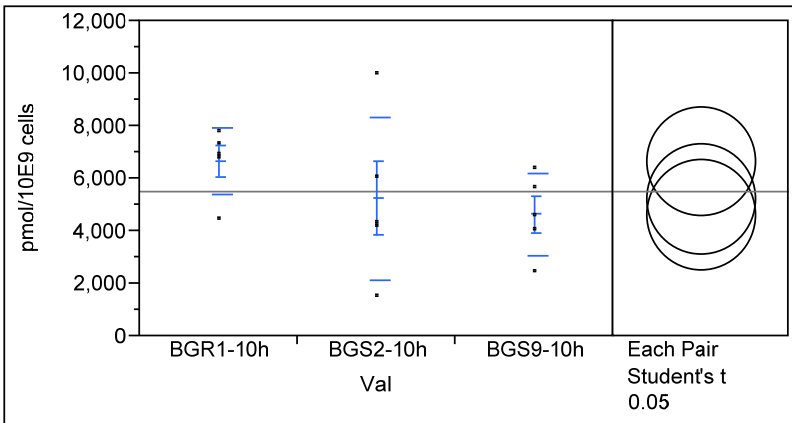

| Strain         | Number of replicates | Mean    | Standard deviation | Connecting Letters | p-value against control |
|----------------|----------------------|---------|--------------------|--------------------|-------------------------|
| BGR1-10 h (LB) | 5                    | 6662.20 | 1278.16            | A                  |                         |
| BGS2-10 h (LB) | 5                    | 5236.40 | 3128.30            | A                  | 0.3135                  |
| BGS9-10 h (LB) | 5                    | 4633.40 | 1535.44            | A                  | 0.1603                  |

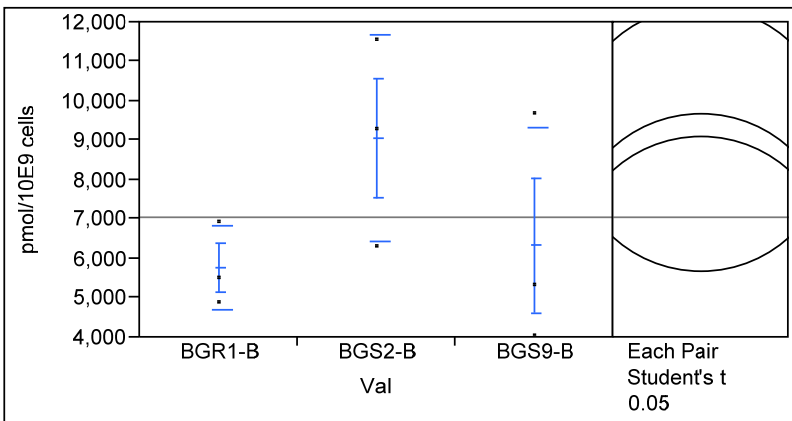

| Strain          | Number of replicates | Mean    | Standard deviation | Connecting Letters | p-value against control |
|-----------------|----------------------|---------|--------------------|--------------------|-------------------------|
| BGR1-10 h (BLB) | 3                    | 5769.00 | 1063.90            | A                  |                         |
| BGS2-10 h (BLB) | 3                    | 9051.67 | 2624.88            | A                  | 0.1405                  |
| BGS9-10 h (BLB) | 3                    | 6349.33 | 2967.26            | A                  | 0.7742                  |

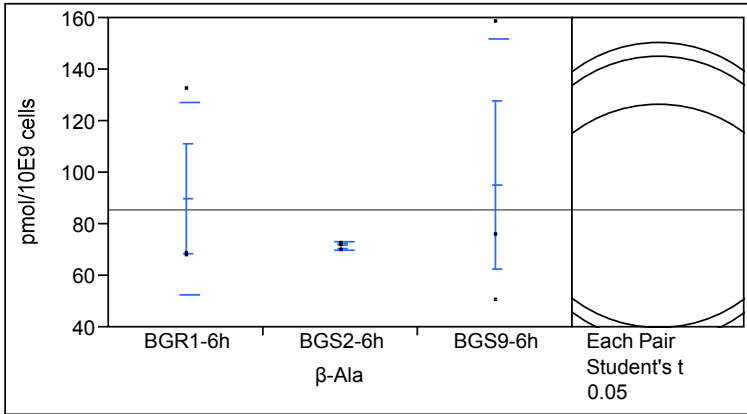

| Strain        | Number of replicates | Mean    | Standard deviation | Connecting Letters | p-value against control |
|---------------|----------------------|---------|--------------------|--------------------|-------------------------|
| BGR1-6 h (LB) | 3                    | 90.0000 | 37.2424            | A                  |                         |
| BGS2-6 h (LB) | 3                    | 71.6667 | 1.5275             | A                  | 0.5866                  |
| BGS9-6 h (LB) | 3                    | 95.3333 | 56.5361            | A                  | 0.8728                  |

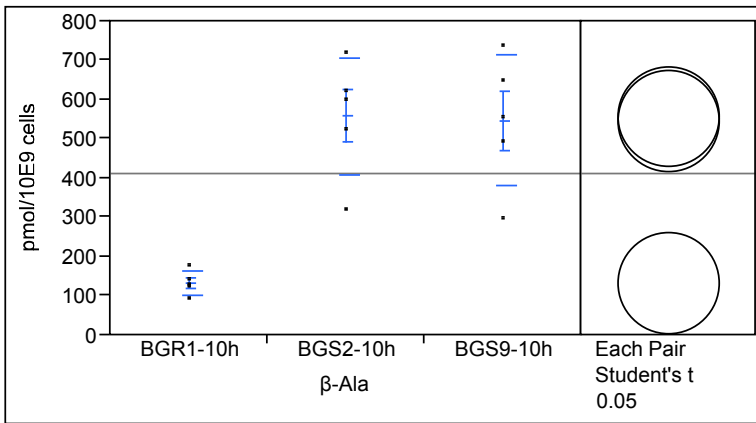

| Strain         | Number of replicates | Mean    | Standard deviation | Connecting Letters | p-value against control |
|----------------|----------------------|---------|--------------------|--------------------|-------------------------|
| BGR1-10 h (LB) | 5                    | 133.200 | 31.276             | B                  |                         |
| BGS2-10 h (LB) | 5                    | 558.200 | 149.416            | A                  | 0.0002                  |
| BGS9-10 h (LB) | 5                    | 547.200 | 167.086            | A                  | 0.0003                  |

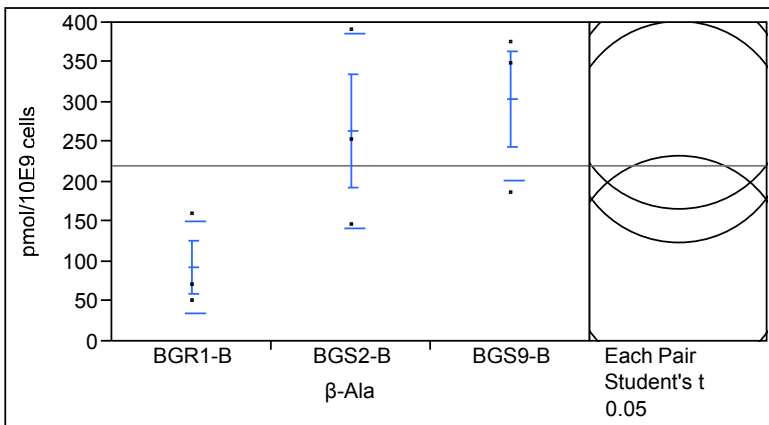

| Strain          | Number of replicates | Mean    | Standard deviation | Connecting Letters | p-value against control |
|-----------------|----------------------|---------|--------------------|--------------------|-------------------------|
| BGR1-10 h (BLB) | 3                    | 93.667  | 57.457             | B                  |                         |
| BGS2-10 h (BLB) | 3                    | 264.000 | 122.870            | AB                 | 0.0777                  |
| BGS9-10 h (BLB) | 3                    | 304.333 | 102.442            | A                  | 0.0391                  |

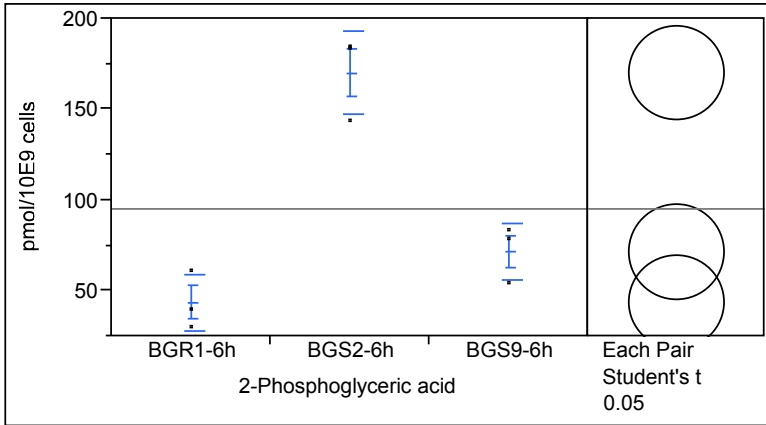

| Strain        | Number of replicates | Mean    | Standard deviation | Connecting Letters | p-value against control |
|---------------|----------------------|---------|--------------------|--------------------|-------------------------|
| BGR1-6 h (LB) | 3                    | 43.667  | 15.8219            | B                  |                         |
| BGS2-6 h (LB) | 3                    | 170.333 | 22.8108            | A                  | 0.0001                  |
| BGS9-6 h (LB) | 3                    | 71.667  | 15.5027            | B                  | 0.1110                  |

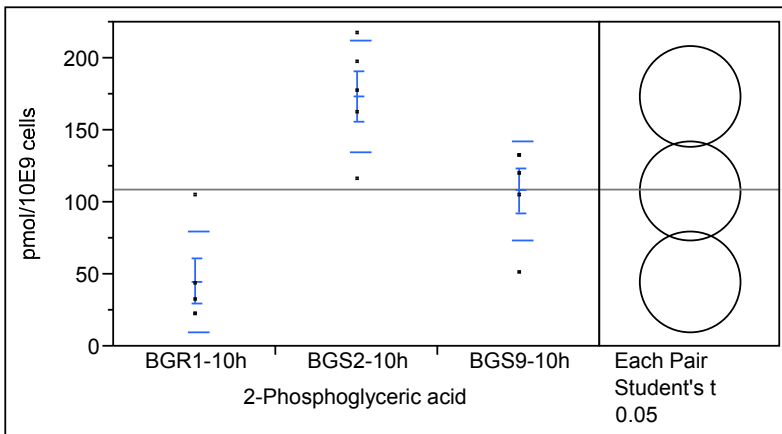

| Strain         | Number of replicates | Mean    | Standard deviation | Connecting Letters | p-value against control |
|----------------|----------------------|---------|--------------------|--------------------|-------------------------|
| BGR1-10 h (LB) | 5                    | 45.200  | 34.6511            | C                  |                         |
| BGS2-10 h (LB) | 5                    | 174.000 | 38.5422            | A                  | <.0001                  |
| BGS9-10 h (LB) | 5                    | 108.200 | 33.9220            | B                  | 0.0165                  |

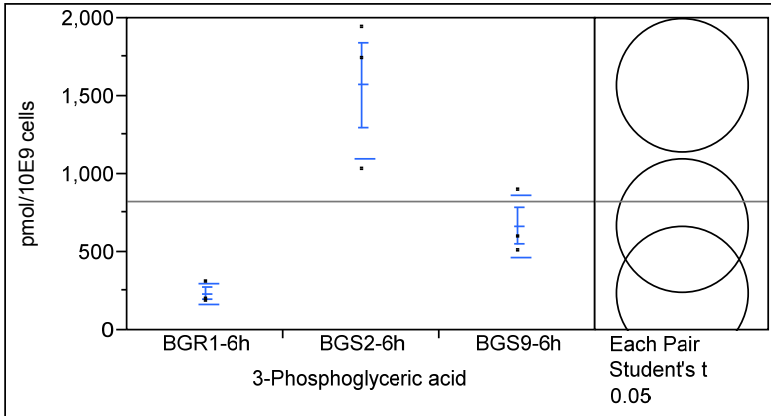

| Strain        | Number of replicates | Mean    | Standard deviation | Connecting Letters | $p$ -value against control |
|---------------|----------------------|---------|--------------------|--------------------|----------------------------|
| BGR1-6 h (LB) | 3                    | 236.33  | 69.212             | B                  |                            |
| BGS2-6 h (LB) | 3                    | 1573.00 | 477.067            | A                  | 0.0016                     |
| BGS9-6 h (LB) | 3                    | 668.67  | 202.179            | B                  | 0.1299                     |

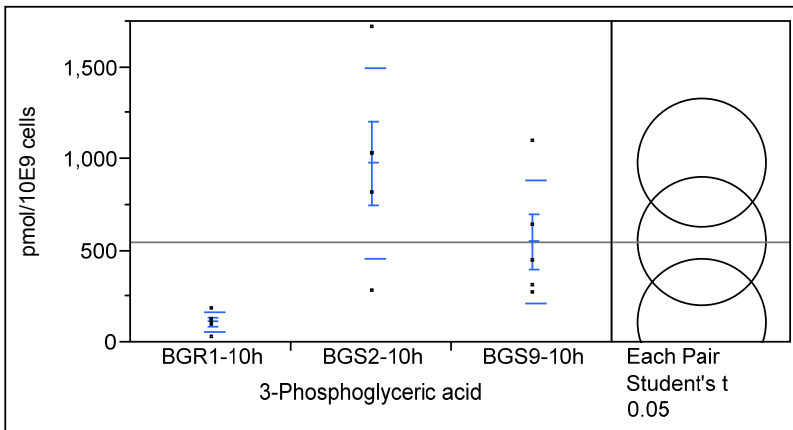

| Strain         | Number of replicates | Mean    | Standard deviation | Connecting Letters | $p$ -value against control |
|----------------|----------------------|---------|--------------------|--------------------|----------------------------|
| BGR1-10 h (LB) | 5                    | 112.600 | 55.527             | B                  |                            |
| BGS2-10 h (LB) | 5                    | 978.200 | 518.608            | A                  | 0.0024                     |
| BGS9-10 h (LB) | 5                    | 551.600 | 335.789            | AB                 | 0.0765                     |

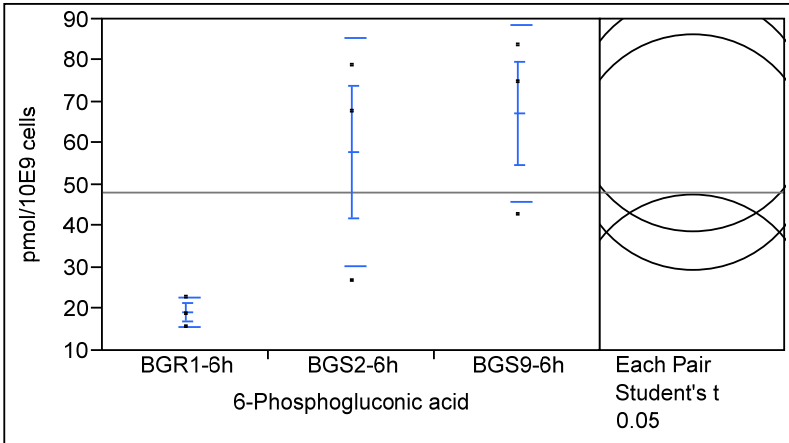

| Strain        | Number of replicates | Mean    | Standard deviation | Connecting Letters | p-value against control |
|---------------|----------------------|---------|--------------------|--------------------|-------------------------|
| BGR1-6 h (LB) | 3                    | 19.3333 | 3.5119             | B                  |                         |
| BGS2-6 h (LB) | 3                    | 58.0000 | 27.4044            | AB                 | 0.0578                  |
| BGS9-6 h (LB) | 3                    | 67.3333 | 21.5484            | A                  | 0.0271                  |

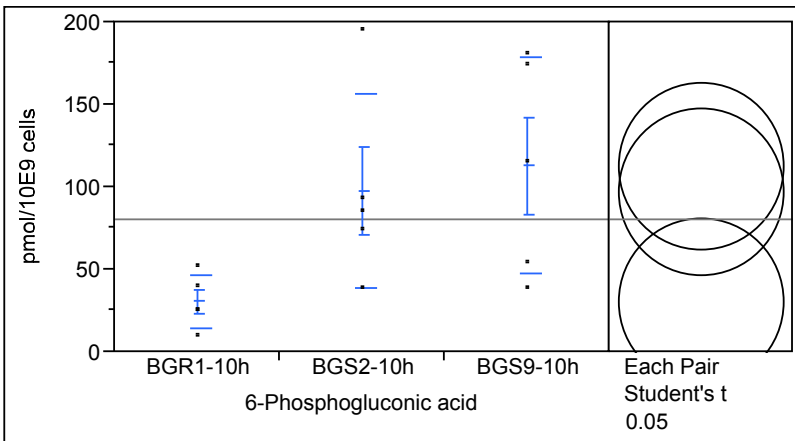

| Strain         | Number of replicates | Mean    | Standard deviation | Connecting Letters | p-value against control |
|----------------|----------------------|---------|--------------------|--------------------|-------------------------|
| BGR1-10 h (LB) | 5                    | 30.780  | 15.9450            | B                  |                         |
| BGS2-10 h (LB) | 5                    | 97.600  | 58.7988            | AB                 | 0.0639                  |
| BGS9-10 h (LB) | 5                    | 113.200 | 65.7967            | A                  | 0.0270                  |

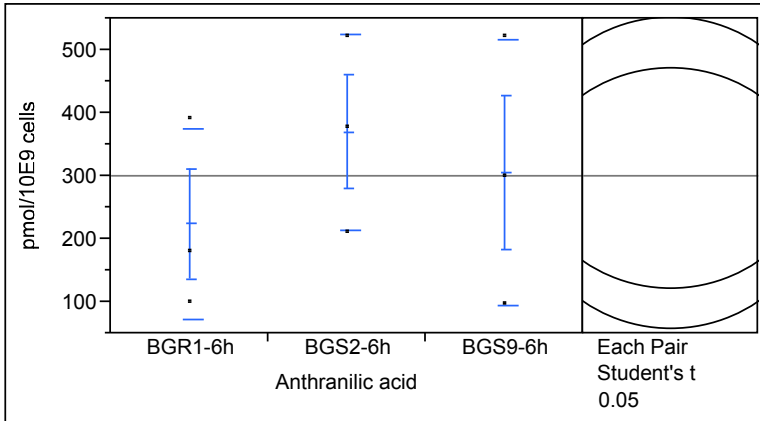

| Strain        | Number of replicates | Mean    | Standard deviation | Connecting Letters | <i>p</i> -value against control |
|---------------|----------------------|---------|--------------------|--------------------|---------------------------------|
| BGR1-6 h (LB) | 3                    | 224.667 | 151.302            | A                  |                                 |
| BGS2-6 h (LB) | 3                    | 370.667 | 155.597            | A                  | 0.3463                          |
| BGS9-6 h (LB) | 3                    | 306.000 | 211.587            | A                  | 0.5899                          |

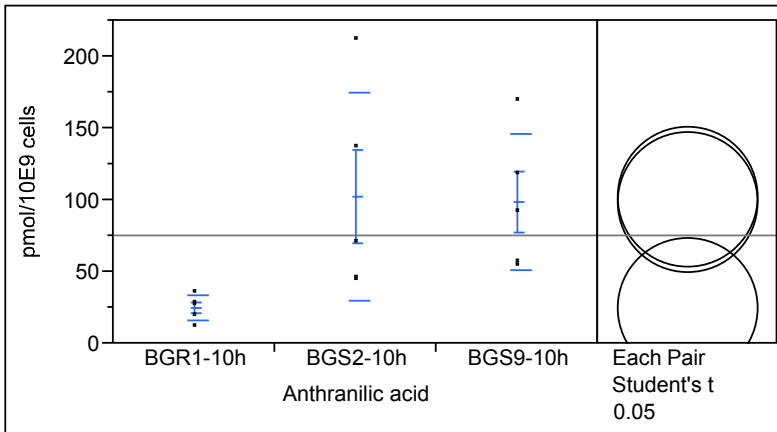

| Strain         | Number of replicates | Mean    | Standard deviation | Connecting Letters | <i>p</i> -value against control |
|----------------|----------------------|---------|--------------------|--------------------|---------------------------------|
| BGR1-10 h (LB) | 5                    | 25.200  | 8.8713             | B                  |                                 |
| BGS2-10 h (LB) | 5                    | 102.400 | 72.0090            | A                  | 0.0315                          |
| BGS9-10 h (LB) | 5                    | 98.800  | 47.7148            | A                  | 0.0387                          |



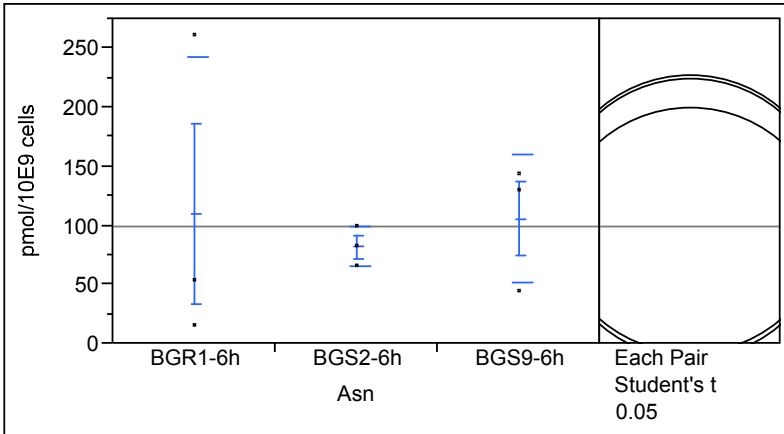

| Strain        | Number of replicates | Mean    | Standard deviation | Connecting Letters | p-value against control |
|---------------|----------------------|---------|--------------------|--------------------|-------------------------|
| BGR1-6 h (LB) | 3                    | 110.000 | 133.000            | A                  |                         |
| BGS2-6 h (LB) | 3                    | 82.000  | 17.000             | A                  | 0.6955                  |
| BGS9-6 h (LB) | 3                    | 106.000 | 54.148             | A                  | 0.9551                  |

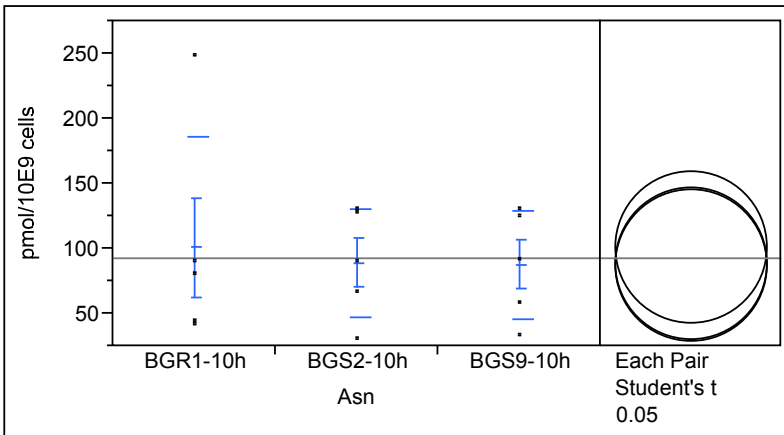

| Strain         | Number of replicates | Mean    | Standard deviation | Connecting Letters | p-value against control |
|----------------|----------------------|---------|--------------------|--------------------|-------------------------|
| BGR1-10 h (LB) | 5                    | 101.000 | 85.4430            | A                  |                         |
| BGS2-10 h (LB) | 5                    | 89.000  | 42.1189            | A                  | 0.7573                  |
| BGS9-10 h (LB) | 5                    | 88.000  | 41.5512            | A                  | 0.7379                  |

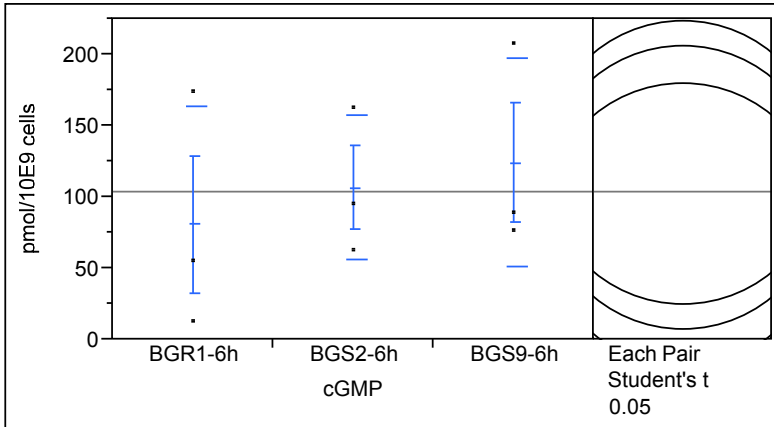

| Strain        | Number of replicates | Mean    | Standard deviation | Connecting Letters | p-value against control |
|---------------|----------------------|---------|--------------------|--------------------|-------------------------|
| BGR1-6 h (LB) | 3                    | 80.667  | 83.5125            | A                  |                         |
| BGS2-6 h (LB) | 3                    | 106.667 | 50.5206            | A                  | 0.6664                  |
| BGS9-6 h (LB) | 3                    | 124.333 | 72.7484            | A                  | 0.4755                  |

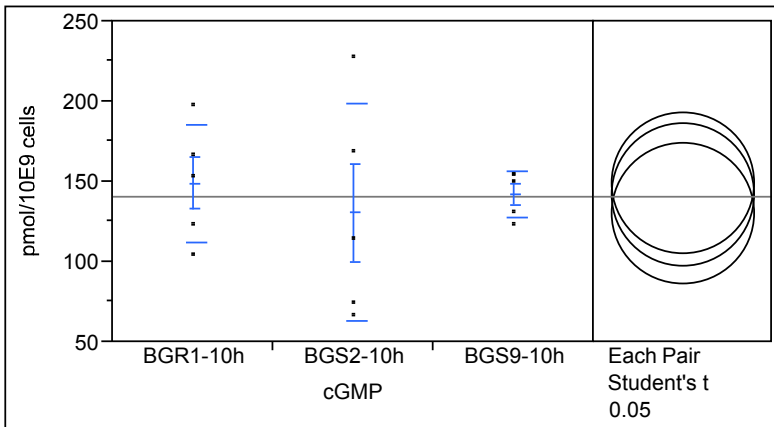

| Strain         | Number of replicates | Mean    | Standard deviation | Connecting Letters | p-value against control |
|----------------|----------------------|---------|--------------------|--------------------|-------------------------|
| BGR1-10 h (LB) | 5                    | 149.200 | 36.5814            | A                  |                         |
| BGS2-10 h (LB) | 5                    | 130.600 | 67.7739            | A                  | 0.5279                  |
| BGS9-10 h (LB) | 5                    | 142.400 | 14.4326            | A                  | 0.8162                  |

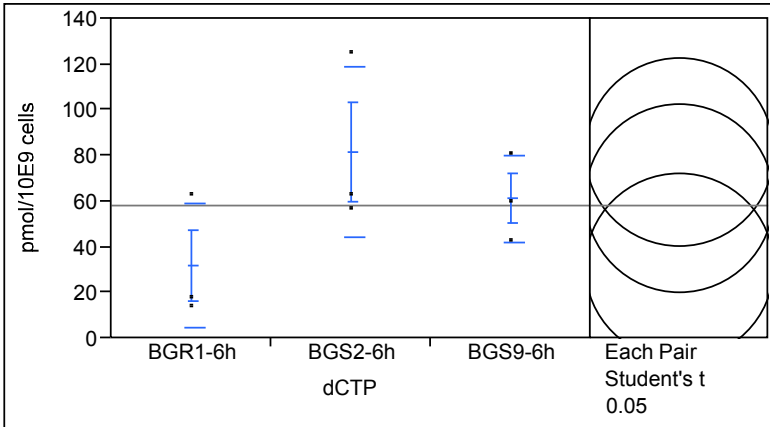

| Strain        | Number of replicates | Mean    | Standard deviation | Connecting Letters | p-value against control |
|---------------|----------------------|---------|--------------------|--------------------|-------------------------|
| BGR1-6 h (LB) | 3                    | 31.6667 | 27.2091            | A                  |                         |
| BGS2-6 h (LB) | 3                    | 81.6667 | 37.6475            | A                  | 0.0791                  |
| BGS9-6 h (LB) | 3                    | 61.3333 | 19.0351            | A                  | 0.2566                  |

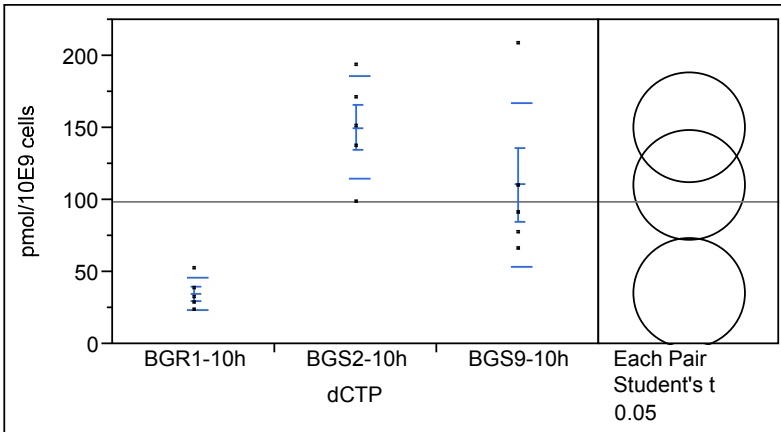

| Strain         | Number of replicates | Mean    | Standard deviation | Connecting Letters | p-value against control |
|----------------|----------------------|---------|--------------------|--------------------|-------------------------|
| BGR1-10 h (LB) | 5                    | 35.400  | 11.2383            | B                  |                         |
| BGS2-10 h (LB) | 5                    | 150.600 | 35.7813            | A                  | 0.0006                  |
| BGS9-10 h (LB) | 5                    | 110.800 | 57.2687            | A                  | 0.0107                  |

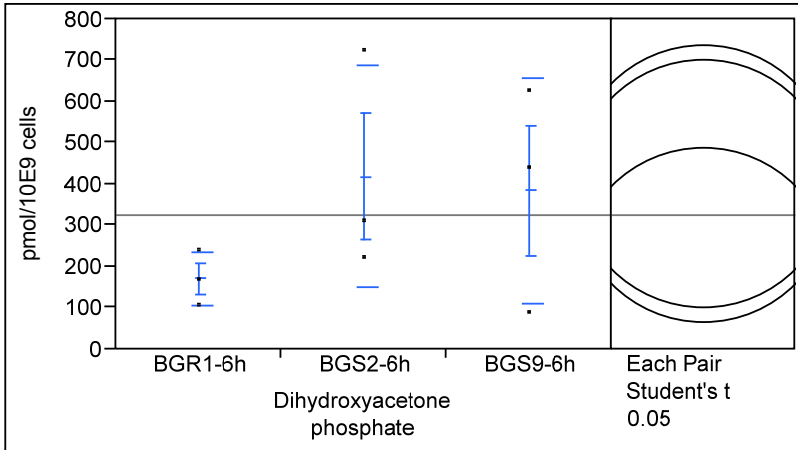

| Strain        | Number of replicates | Mean    | Standard deviation | Connecting Letters | p-value against control |
|---------------|----------------------|---------|--------------------|--------------------|-------------------------|
| BGR1-6 h (LB) | 3                    | 171.667 | 66.040             | A                  |                         |
| BGS2-6 h (LB) | 3                    | 419.667 | 268.398            | A                  | 0.2246                  |
| BGS9-6 h (LB) | 3                    | 385.333 | 273.134            | A                  | 0.2877                  |

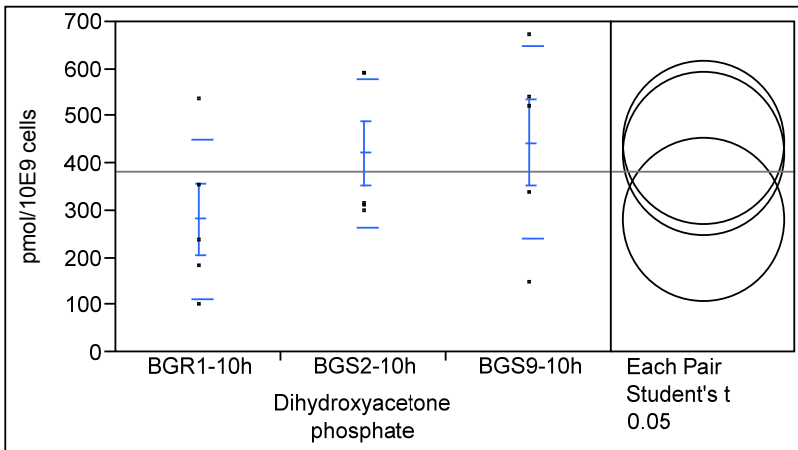

| Strain         | Number of replicates | Mean    | Standard deviation | Connecting Letters | p-value against control |
|----------------|----------------------|---------|--------------------|--------------------|-------------------------|
| BGR1-10 h (LB) | 5                    | 283.000 | 168.901            | A                  |                         |
| BGS2-10 h (LB) | 5                    | 422.000 | 155.751            | A                  | 0.2392                  |
| BGS9-10 h (LB) | 5                    | 444.800 | 204.114            | A                  | 0.1749                  |

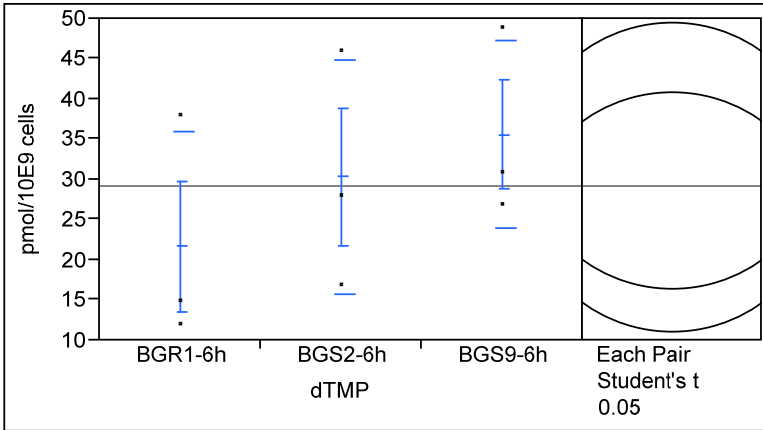

| Strain        | Number of replicates | Mean    | Standard deviation | Connecting Letters | p-value against control |
|---------------|----------------------|---------|--------------------|--------------------|-------------------------|
| BGR1-6 h (LB) | 3                    | 21.6667 | 14.2244            | A                  |                         |
| BGS2-6 h (LB) | 3                    | 30.3333 | 14.6401            | A                  | 0.4644                  |
| BGS9-6 h (LB) | 3                    | 35.6667 | 11.7189            | A                  | 0.2539                  |

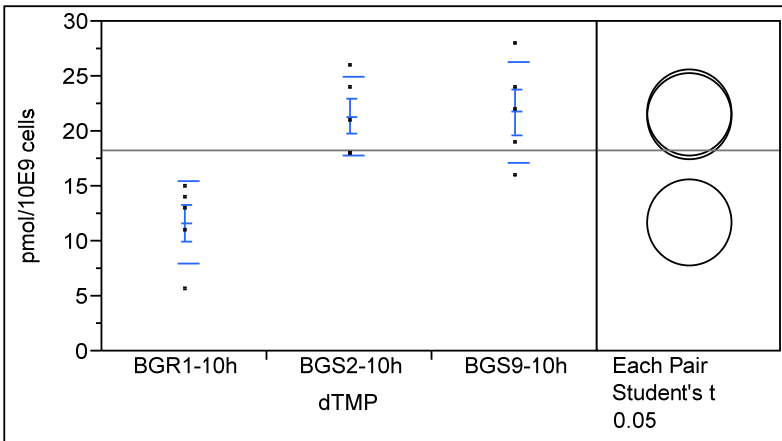

| Strain         | Number of replicates | Mean    | Standard deviation | Connecting Letters | p-value against control |
|----------------|----------------------|---------|--------------------|--------------------|-------------------------|
| BGR1-10 h (LB) | 5                    | 11.7200 | 3.72720            | B                  |                         |
| BGS2-10 h (LB) | 5                    | 21.4000 | 3.57771            | A                  | 0.0024                  |
| BGS9-10 h (LB) | 5                    | 21.8000 | 4.60435            | A                  | 0.0018                  |

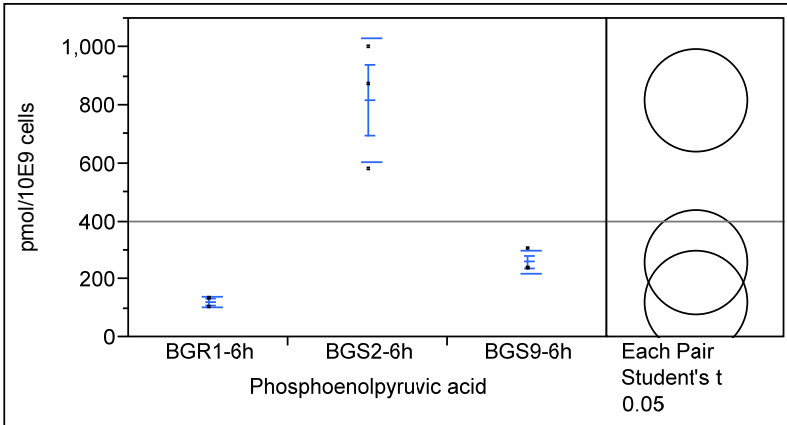

| Strain        | Number of replicates | Mean    | Standard deviation | Connecting Letters | p-value against control |
|---------------|----------------------|---------|--------------------|--------------------|-------------------------|
| BGR1-6 h (LB) | 3                    | 122.000 | 18.193             | B                  |                         |
| BGS2-6 h (LB) | 3                    | 819.000 | 215.237            | A                  | 0.0005                  |
| BGS9-6 h (LB) | 3                    | 260.000 | 37.242             | B                  | 0.2301                  |

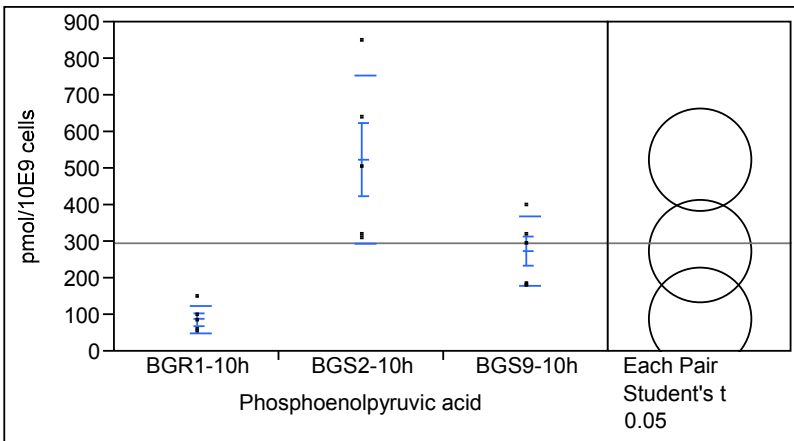

| Strain         | Number of replicates | Mean    | Standard deviation | Connecting Letters | p-value against control |
|----------------|----------------------|---------|--------------------|--------------------|-------------------------|
| BGR1-10 h (LB) | 5                    | 89.200  | 38.252             | B                  |                         |
| BGS2-10 h (LB) | 5                    | 525.000 | 227.824            | A                  | 0.0004                  |
| BGS9-10 h (LB) | 5                    | 275.400 | 92.967             | B                  | 0.0631                  |

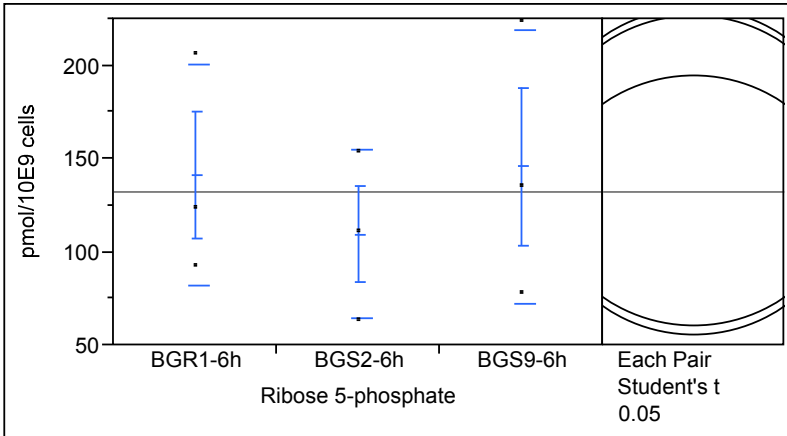

| Strain        | Number of replicates | Mean    | Standard deviation | Connecting Letters | p-value against control |
|---------------|----------------------|---------|--------------------|--------------------|-------------------------|
| BGR1-6 h (LB) | 3                    | 141.333 | 58.9435            | A                  |                         |
| BGS2-6 h (LB) | 3                    | 109.667 | 45.0148            | A                  | 0.5438                  |
| BGS9-6 h (LB) | 3                    | 146.000 | 73.5119            | A                  | 0.9276                  |

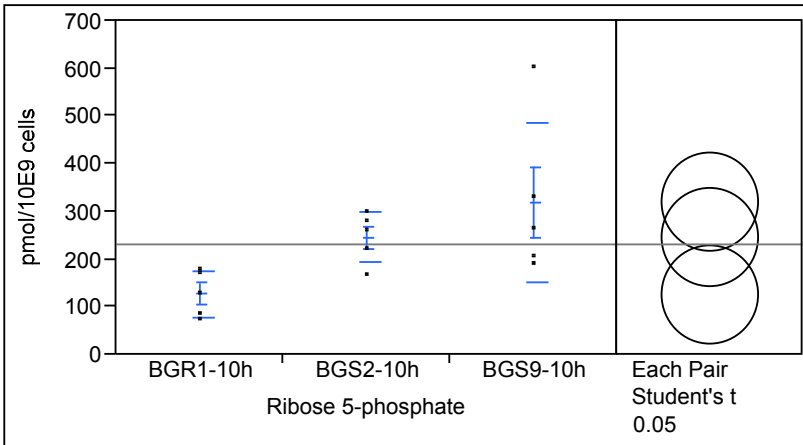

| Strain         | Number of replicates | Mean    | Standard deviation | Connecting Letters | p-value against control |
|----------------|----------------------|---------|--------------------|--------------------|-------------------------|
| BGR1-10 h (LB) | 5                    | 128.200 | 48.597             | B                  |                         |
| BGS2-10 h (LB) | 5                    | 246.400 | 52.061             | AB                 | 0.1025                  |
| BGS9-10 h (LB) | 5                    | 319.000 | 168.699            | A                  | 0.0145                  |

**Fig. S5.** Statistical analysis of differences in the levels of intracellular metabolites. Metabolite levels in the wild-type BGR1, the *tofI* mutant BGS2, and the *qsmR* mutant BGS9 grown in LB broth or LB broth (BLB) supplemented with 100 mM HEPES for 6 or 10 h were measured by capillary electrophoresis time-of-flight mass spectrometry. The metabolites measured were as follows. 3-Hydroxybutyric acid, divalent Acetyl CoA, Adenine, Adenosine, ADP, Ala, AMP, Arg, Asp, ATP, Betaine, cAMP, CDP, Choline, Citric acid, Citrulline, CMP, CTP, Cytidine, Cytosine, dATP, dTDP, dTTP, Fructose 6-phosphate, GABA, GDP, Gln, Glu, Gluconic acid, Glucose 1-phosphate, Glucose 6-phosphate, divalent Glutathione (GSSG), Gly, Glycerol 3-phosphate, Glyoxylic acid, GMP, GTP, Guanosine, His, Homoserine, Hypoxanthine, Ile, Lactic acid, Leu, Lys, Malic acid, NAD<sup>+</sup>, NADP<sup>+</sup>, Ornithine, Phe, Pro, Putrescine, Ribulose 5-phosphate, Sedoheptulose 7-phosphate, Ser, Succinic acid, Thr, Trp, Tyr, UDP, UMP, UTP, Val,  $\beta$ -Ala, 2-Phosphoglyceric acid, 3-Phosphoglyceric acid, 6-Phosphogluconic acid, Anthranilic acid, Asn, cGMP, dCTP, Dihydroxyacetone phosphate, dTMP, Phosphoenolpyruvic acid, and Ribose 5-phosphate.

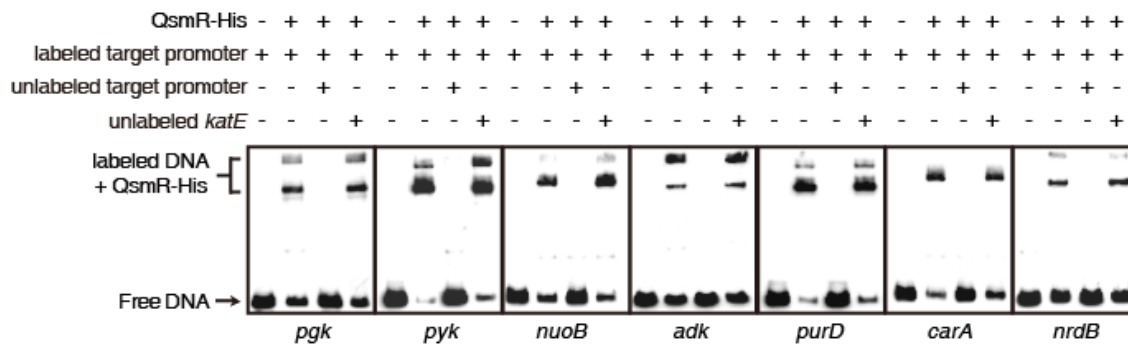

**Fig. S6.** Direct binding of QsmR to the promoter regions of the *pgk*, *pyk*, *nuoB*, *adk*, *purD*, *carA*, and *nrdB* genes.

## SI References

1. Kim J, et al. (2004) Quorum sensing and the LysR-type transcriptional activator ToxR regulate toxoflavin biosynthesis and transport in *Burkholderia glumae*. *Mol Microbiol* 54(4):921-934.
2. Herzberg O, et al. (1996) Swiveling-domain mechanism for enzymatic phosphotransfer between remote reaction sites. *Proc Natl Acad Sci USA* 93(7):2652-2657.
3. Kim J, et al. (2007) Regulation of polar flagellum genes is mediated by quorum sensing and FlhDC in *Burkholderia glumae*. *Mol Microbiol* 64(1):165-179.
